# Supplementary material for: Cobalt-catalysed (4+3)-annulation of oxiranes with 4-vinyl indoles: stereospecific access to fused oxepinoindoles
Source: Royal Society of Chemistry journal article supplement (doi:10.1039/d5cc06979c), 2026-01-01

## Supporting Information

### Cobalt-catalysed (4+3)-annulation of oxiranes with 4-vinyl indoles: stereospecific access to fused oxepinoindoles

#### Table of Contents

|    |                                                                                                                                     |         |
|----|-------------------------------------------------------------------------------------------------------------------------------------|---------|
| 1  | General Information                                                                                                                 | S2      |
| 2  | Crystal Structure and Data of (±)- <b>7</b>                                                                                         | S2-S3   |
| 3  | Optimization of the Reaction Conditions                                                                                             | S4      |
| 4  | General Procedure for the Synthesis of <b>1a-k</b>                                                                                  | S5-S6   |
| 5  | Procedure for the Synthesis of <b>1m</b> , <b>1n</b> , <b>1o</b> and <b>1q</b>                                                      | S7-S11  |
| 6  | General Procedure for the Synthesis of Oxiranes                                                                                     | S11-S12 |
| 7  | Procedure for the Synthesis of <b>2k</b>                                                                                            | S12-S13 |
| 8  | General Procedure for the Synthesis of (±)- <b>3aa-oa</b>                                                                           | S13-S14 |
| 9  | General Procedure for the Enantiospecific Synthesis of <b>3aa'</b> , <b>3af'</b> , <b>3ai'</b> , <b>3ba'</b> and <b>3ha'</b>        | S14     |
| 10 | Characterization Data of (±)- <b>3ab-oa</b> , <b>3aa'</b> , <b>3af'</b> , <b>3ai'</b> , <b>3ba'</b> , <b>3ha'</b> and (±)- <b>4</b> | S14-S30 |
| 11 | HPLC Chromatograms                                                                                                                  | S31-S35 |
| 12 | Scale-up Synthesis of (±)- <b>3af</b> and Post-Synthetic Transformations                                                            | S36-S40 |
| 13 | References                                                                                                                          | S40     |
| 14 | NMR ( <sup>1</sup> H, <sup>13</sup> C and <sup>19</sup> F) Spectra and NOESY spectra of (±)- <b>3ap</b>                             | S41-S86 |

**General Information.** 1*H*-Indole-4-carbaldehyde, styrene, 1,2-epoxybutane, AD-mix- $\alpha$ , Sc(OTf)<sub>3</sub> (99%), Ni(OTf)<sub>2</sub> (96%), Zn(OTf)<sub>2</sub> (98%), Cu(OTf)<sub>2</sub> (98%), FeCl<sub>3</sub> (97%), CoCl<sub>2</sub> (97%), CoCl<sub>2</sub>•6H<sub>2</sub>O (98%), Co(OAc)<sub>2</sub>•4H<sub>2</sub>O (>98%), Pd(PPh<sub>3</sub>)<sub>4</sub> (99%) and oxone were purchased from Aldrich and used as received. (*R*)-Styrene oxide (>96%) was purchased from TCI and used as such. *m*-CPBA was purchased from SRL and used as such. KO<sup>t</sup>Bu (98%) and DABCO (>98%) were purchased from Spectrochem and used as received. K<sub>2</sub>CO<sub>3</sub>, Na<sub>2</sub>CO<sub>3</sub>, Cs<sub>2</sub>CO<sub>3</sub>, NaOAc and DBU were purchased from Merck and used as received. The solvents were dried prior to use according to the standard procedure. SRL silica gel G/GF 254 plates were used for analytical TLC and SRL silica gel (100-200 mesh) was used for column chromatography. NMR (<sup>1</sup>H, <sup>13</sup>C and <sup>19</sup>F) spectra were recorded with Bruker Avance III 600, 500 and 400 MHz spectrometers using CDCl<sub>3</sub> as solvent and Me<sub>4</sub>Si as an internal standard. Chemical shifts ( $\delta$ ) and spin-spin coupling constant (*J*) are reported in ppm and in Hz, respectively, and other data are reported as follows: s = singlet, d = doublet, t = triplet, m = multiplet, q = quartet, dd = doublet of doublets. Melting points were determined using a Büchi B-540 apparatus and are uncorrected. FT-IR spectra were collected on Perkin Elmer IR spectrometer. Q-ToF ESI-MS instrument was used for recording mass spectra. Single crystal X-ray data of ( $\pm$ )-**7** was collected on a Bruker SMART APEX equipped with a CCD area detector using Mo/K $\alpha$  radiation and the structure was solved by direct method using *SHELXL-2018/3* (Göttingen, Germany).

**Sample Preparation for Crystal Growth.** The compound ( $\pm$ )-**7** was dissolved in minimum volume of acetonitrile and kept at room temperature for slow evaporation (3 days). Needle shaped crystal was formed that was subjected to X-ray diffraction analysis.

#### Crystal Structure and Data of ( $\pm$ )-**7**

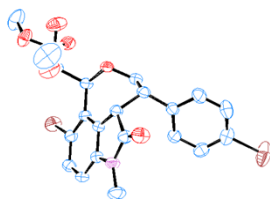

**Figure S1.** ORTEP diagram of Dimethyl 2-(9-bromo-4-(4-bromophenyl)-6-methyl-5-oxo-1,3,4,4a,5,6-hexahydrooxepino[5,4,3-cd]indol-1-yl)malonate ( $\pm$ )-**7** with 50% ellipsoid (CCDC 2481146). H-Omitted for clarity.

|                                                     |                                                                                                                 |
|-----------------------------------------------------|-----------------------------------------------------------------------------------------------------------------|
| Identification code                                 | (±)-7                                                                                                           |
| Empirical formula                                   | 'C <sub>23</sub> H <sub>21</sub> Br <sub>2</sub> NO <sub>6</sub> '                                              |
| Formula weight                                      | 567.23                                                                                                          |
| Crystal habit, colour                               | needle/Colorless                                                                                                |
| Temperature, <i>T</i> /K                            | 296 K                                                                                                           |
| Wavelength, $\lambda$ /Å                            | 0.71073                                                                                                         |
| Crystal system                                      | 'monoclinic'                                                                                                    |
| Space group                                         | 'P 2 <sub>1</sub> /c'                                                                                           |
| Unit cell dimensions                                | a = 10.123(5) Å<br>b = 26.415(11) Å<br>c = 8.733(4) Å<br>$\alpha$ = 90<br>$\beta$ = 103.709(1)<br>$\gamma$ = 90 |
| Volume, <i>V</i> /Å <sup>3</sup>                    | 2268.8(18)                                                                                                      |
| <i>Z</i>                                            | 4                                                                                                               |
| Calculated density, Mg·m <sup>-3</sup>              | 1.661                                                                                                           |
| Absorption coefficient, $\mu$ /mm <sup>-1</sup>     | 3.613                                                                                                           |
| <i>F</i> (000)                                      | 1136                                                                                                            |
| $\theta$ range for data collection                  | 2.21 to 25.37°                                                                                                  |
| Limiting indices                                    | -12 ≤ <i>h</i> ≤ 12, -32 ≤ <i>k</i> ≤ 32, -10 ≤ <i>l</i> ≤ 10                                                   |
| Reflection collected / unique                       | 4297/3524                                                                                                       |
| Completeness to $\theta$                            | 99.7%                                                                                                           |
| Absorption correction                               | None                                                                                                            |
| Max. and min. transmission                          | 0.865 and 0.714                                                                                                 |
| Refinement method                                   | 'SHELXL-2018/3 (Sheldrick, 2015)'                                                                               |
| Data / restraints / parameters                      | 4297/0/292                                                                                                      |
| Goodness-of-fit on <i>F</i> <sup>2</sup>            | 1.093                                                                                                           |
| Final <i>R</i> indices [ <i>I</i> > 2σ( <i>I</i> )] | <i>R</i> 1 = 0.0373, <i>wR</i> 2 = 0.1105                                                                       |
| <i>R</i> indices (all data)                         | <i>R</i> 1 = 0.0496, <i>wR</i> 2 = 0.1242                                                                       |

**Table S1.** Optimization of the reaction conditions<sup>a,b,c</sup>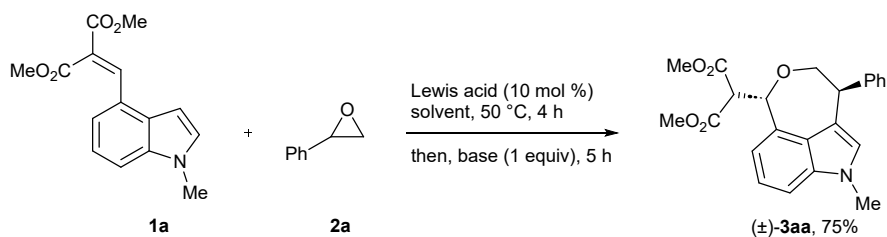

| Entry           | Lewis acid                                            | Base                            | Solvent                           | Yield (%) <sup>b</sup> |
|-----------------|-------------------------------------------------------|---------------------------------|-----------------------------------|------------------------|
| 1               | Sc(OTf) <sub>3</sub>                                  | KO <sup>t</sup> Bu              | CH <sub>2</sub> Cl <sub>2</sub>   | n.d.                   |
| 2               | Ni(OTf) <sub>2</sub>                                  | KO <sup>t</sup> Bu              | CH <sub>2</sub> Cl <sub>2</sub>   | trace                  |
| 3               | Zn(OTf) <sub>2</sub>                                  | KO <sup>t</sup> Bu              | CH <sub>2</sub> Cl <sub>2</sub>   | 16                     |
| 4               | Cu(OTf) <sub>2</sub>                                  | KO <sup>t</sup> Bu              | CH <sub>2</sub> Cl <sub>2</sub>   | trace                  |
| 5               | FeCl <sub>3</sub>                                     | KO <sup>t</sup> Bu              | CH <sub>2</sub> Cl <sub>2</sub>   | trace                  |
| 6               | CoCl <sub>2</sub>                                     | KO <sup>t</sup> Bu              | CH <sub>2</sub> Cl <sub>2</sub>   | 23                     |
| 7               | CoCl <sub>2</sub> •6H <sub>2</sub> O                  | KO <sup>t</sup> Bu              | CH <sub>2</sub> Cl <sub>2</sub>   | 35                     |
| 8               | Ni(ClO <sub>4</sub> ) <sub>2</sub> •6H <sub>2</sub> O | KO <sup>t</sup> Bu              | CH <sub>2</sub> Cl <sub>2</sub>   | 15                     |
| 9               | Co(OAc) <sub>2</sub> •4H <sub>2</sub> O               | KO <sup>t</sup> Bu              | CH <sub>2</sub> Cl <sub>2</sub>   | 57                     |
| <sup>c</sup> 10 | Co(OAc) <sub>2</sub> •4H <sub>2</sub> O               | KO <sup>t</sup> Bu              | CH <sub>2</sub> Cl <sub>2</sub>   | 75                     |
| <sup>c</sup> 11 | Co(OAc) <sub>2</sub> •4H <sub>2</sub> O               | K <sub>2</sub> CO <sub>3</sub>  | CH <sub>2</sub> Cl <sub>2</sub>   | 61                     |
| <sup>c</sup> 12 | Co(OAc) <sub>2</sub> •4H <sub>2</sub> O               | Na <sub>2</sub> CO <sub>3</sub> | CH <sub>2</sub> Cl <sub>2</sub>   | 55                     |
| <sup>c</sup> 13 | Co(OAc) <sub>2</sub> •4H <sub>2</sub> O               | Cs <sub>2</sub> CO <sub>3</sub> | CH <sub>2</sub> Cl <sub>2</sub>   | 41                     |
| <sup>c</sup> 14 | Co(OAc) <sub>2</sub> •4H <sub>2</sub> O               | NaOAc                           | CH <sub>2</sub> Cl <sub>2</sub>   | trace                  |
| <sup>c</sup> 15 | Co(OAc) <sub>2</sub> •4H <sub>2</sub> O               | DBU                             | CH <sub>2</sub> Cl <sub>2</sub>   | n.d.                   |
| <sup>c</sup> 16 | Co(OAc) <sub>2</sub> •4H <sub>2</sub> O               | DABCO                           | CH <sub>2</sub> Cl <sub>2</sub>   | n.r.                   |
| <sup>c</sup> 17 | Co(OAc) <sub>2</sub> •4H <sub>2</sub> O               | KO <sup>t</sup> Bu              | (CH <sub>2</sub> Cl) <sub>2</sub> | 60                     |
| <sup>c</sup> 18 | Co(OAc) <sub>2</sub> •4H <sub>2</sub> O               | KO <sup>t</sup> Bu              | toluene                           | n.d.                   |
| <sup>c</sup> 19 | Co(OAc) <sub>2</sub> •4H <sub>2</sub> O               | KO <sup>t</sup> Bu              | THF                               | trace                  |
| <sup>c</sup> 20 | Co(OAc) <sub>2</sub> •4H <sub>2</sub> O               | KO <sup>t</sup> Bu              | CH <sub>3</sub> CN                | 45                     |

<sup>a</sup>Reaction conditions: **1a** (0.2 mmol), **2a** (0.24 mmol), Lewis acid (10 mol %), solvent (3 mL), 50 °C, 4 h, then, base (0.2 mmol), 5 h. <sup>b</sup>Isolated yield. <sup>c</sup>4 Å MS used. n.r.= no reaction. n.d.= not detected.

### Scheme S1. General Procedure for the Synthesis of Alkylidene Indole Malonates 1a-k.<sup>1</sup>

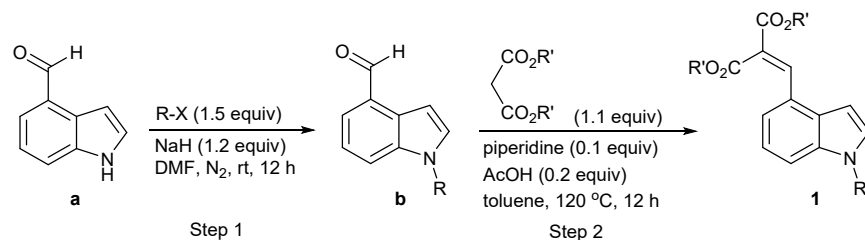

**Step-1:** 1*H*-Indole-4-carbaldehyde **a** (3 mmol, 1 equiv, 435 mg) was added to a suspension of NaH (3.6 mmol, 60% dispersion in mineral oil, 1.2 equiv, 144 mg) in DMF (10 mL) at 0 °C under nitrogen atmosphere. The reaction mixture was allowed to stir at the same temperature for 30 minutes and then alkyl halide (4.5 mmol, 1.5 equiv) was added dropwise. The resultant mixture was then stirred at room temperature for 12 h. After completion, as monitored by TLC, the reaction mixture was diluted with ethyl acetate (30 mL), washed with brine (2 x 10 mL) and ice-water (1 x 10 mL). Drying (Na<sub>2</sub>SO<sub>4</sub>) and evaporation of the solvent gave a residue that was purified by silica gel column chromatography using hexane and ethyl acetate as eluent to give **b**.

**Step-2:** To a solution of **b** (2 mmol, 1 equiv) in toluene (10 mL), was added dialkyl malonate (2.2 mmol, 1.1 equiv), piperidine (0.2 mmol, 0.1 equiv, 17 mg) and AcOH (0.4 mmol, 0.2 equiv, 24 mg) and the resultant mixture was stirred at 120 °C for 12 h in a pre-heated oil bath under calcium chloride tube. After completion, as monitored by TLC, the solvent was evaporated and the reaction mixture was diluted with ethyl acetate (30 mL) and washed with saturated NaHCO<sub>3</sub> solution (1 x 10 mL). Drying (Na<sub>2</sub>SO<sub>4</sub>) and evaporation of the solvent gave a residue that was purified by silica gel column chromatography using hexane and ethyl acetate as eluent to give **1**.

Substrates **1i**, **1j**, **1m**, **1n**, **1o** and **1q** are new and their complete characterization data are given. Compound **1l** and **1p** are prepared according to the reported procedure.<sup>1b</sup>

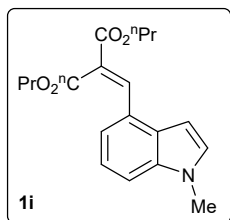

**Dipropyl 2-((1-methyl-1H-indol-4-yl)methylene)malonate 1i.** Analytical TLC on silica gel, 1:9 ethyl acetate/hexane  $R_f$  = 0.50; orange sticky liquid; yield 75% (740 mg);  $^1\text{H}$  NMR (400 MHz,  $\text{CDCl}_3$ )  $\delta$  8.23 (s, 1H), 7.37-7.35 (m, 1H), 7.31-7.30 (m, 1H), 7.20-7.16 (m, 1H), 7.14-7.13 (m, 1H), 6.65-6.64 (m, 1H), 4.25-4.18 (m, 4H), 3.80 (s, 3H), 1.79-1.70 (m, 2H), 1.68-1.61 (m, 2H), 0.99 (t,  $J$  = 7.6 Hz, 3H), 0.84 (t,  $J$  = 7.6 Hz, 3H);  $^{13}\text{C}$  NMR (125 MHz,  $\text{CDCl}_3$ )  $\delta$  167.4, 164.7, 140.4, 136.9, 130.1, 129.0, 125.9, 125.1, 121.6, 119.4, 111.7, 99.3, 67.3, 67.1, 33.1, 22.1, 21.8, 10.5, 10.4; FT-IR (KBr) 2976, 1727, 1619, 1433, 1260, 1222, 1124, 750  $\text{cm}^{-1}$ ; HRMS (ESI)  $m/z$   $[\text{M}+\text{H}]^+$  calcd for  $\text{C}_{19}\text{H}_{24}\text{NO}_4$ : 330.1700, found: 330.1702.

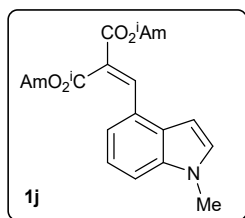

**Diisoamyl 2-((1-methyl-1H-indol-4-yl)methylene)malonate 1j.** Analytical TLC on silica gel, 1:9 ethyl acetate/hexane  $R_f$  = 0.55; yellow sticky liquid; yield 68% (785 mg);  $^1\text{H}$  NMR (400 MHz,  $\text{CDCl}_3$ )  $\delta$  8.22 (s, 1H), 7.37-7.35 (m, 1H), 7.30-7.29 (m, 1H), 7.20-7.16 (m, 1H), 7.139-7.131 (m, 1H), 6.64-6.63 (m, 1H), 4.32-4.24 (m, 4H), 3.80 (s, 3H), 1.81-1.68 (m, 1H), 1.64-1.59 (m, 2H), 1.57-1.54 (m, 1H), 1.51-1.46 (m, 2H), 0.97 (d,  $J$  = 6.8 Hz, 6H), 0.86 (d,  $J$  = 6.4 Hz, 6H);  $^{13}\text{C}$  NMR (125 MHz,  $\text{CDCl}_3$ )  $\delta$  167.4, 164.7, 164.6, 140.4, 136.9, 130.1, 125.9, 125.1, 121.5, 119.4, 111.7, 99.3, 64.2, 37.3, 37.1, 33.1, 25.2, 24.8, 22.6, 22.4; FT-IR (KBr) 2958, 1725, 1679, 1267, 1228, 1079, 752  $\text{cm}^{-1}$ ; HRMS (ESI)  $m/z$   $[\text{M}+\text{H}]^+$  calcd for  $\text{C}_{23}\text{H}_{32}\text{NO}_4$ : 386.2326, found: 386.2325.

## Scheme S2. Procedure for the Synthesis of 1m.

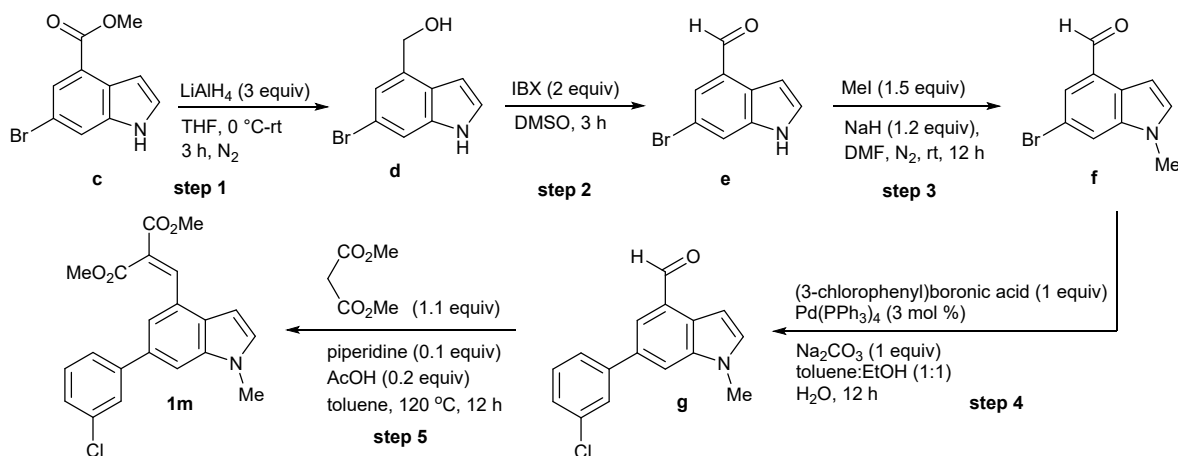

**Step-1:** To a solution of **c** (5 mmol, 1 equiv, 1265 mg) in THF (20 mL) at 0 °C under nitrogen atmosphere,  $\text{LiAlH}_4$  (15 mmol, 3 equiv, 570 mg) was added portion wise. The reaction mixture was gradually allowed to warm up to room temperature and stirred for 3 h. After completion, the reaction mixture was quenched with saturated  $\text{NH}_4\text{Cl}$  (30 mL) and extracted with ethyl acetate (3 x 20 mL). Drying ( $\text{Na}_2\text{SO}_4$ ) and evaporation of the solvent gave a residue that was purified by silica gel column chromatography using ethyl acetate and hexane as an eluent to afford **d**.

**Step-2:** To a suspension of IBX (8 mmol, 2 equiv, 2240 mg) in DMSO (15 mL), was added (6-bromo-1H-indol-4-yl)methanol **d** (4 mmol, 1 equiv, 900 mg) and the resultant mixture was stirred at room temperature for 3 h under air. The reaction mixture was then diluted with ethyl acetate (30 mL), washed with brine (1 x 10 mL) and ice-water (1 x 10 mL). Drying ( $\text{Na}_2\text{SO}_4$ ) and evaporation of the solvent gave a residue that was purified by silica gel column chromatography using hexane and ethyl acetate as eluent to give **e**.

**Step-3:** To a suspension of NaH (3.6 mmol, 60% dispersion in mineral oil, 1.2 equiv, 144 mg) in DMF (10 mL) at 0 °C, was added 6-bromo-1H-indole-4-carbaldehyde **e** (3 mmol, 1 equiv, 669 mg), under nitrogen atmosphere. The reaction mixture was stirred at the same temperature for 30 minutes and then methyl iodide (4.5 mmol, 1.5 equiv, 639 mg) was added dropwise. The mixture was then allowed to stir at room temperature for 12 h. After completion, as monitored by TLC, the reaction mixture was diluted with ethyl acetate (30 mL), washed with brine (1 x 10 mL) and ice-

water (1 x 10 mL). Drying (Na<sub>2</sub>SO<sub>4</sub>) and evaporation of the solvent gave a residue that was purified by silica gel column chromatography using hexane and ethyl acetate as eluent to give **f**.

**Step-4:** To a solution of **f** (2 mmol, 1 equiv, 474 mg) in toluene/EtOH (1:1, 6 mL), was added (3-chlorophenyl)boronic acid (2 mmol, 1 equiv, 312 mg), Pd(PPh<sub>3</sub>)<sub>4</sub> (3 mol %, 0.03 equiv, 34 mg), Na<sub>2</sub>CO<sub>3</sub> (2 mmol, 1 equiv, 212 mg) and H<sub>2</sub>O (100 µL). The mixture was stirred at 100 °C for 12 h in a pre-heated oil bath under nitrogen atmosphere. After 12 h, the reaction mixture was cooled to room temperature and diluted with ethyl acetate (15 mL) and washed with brine (1 x 10 mL). Drying (Na<sub>2</sub>SO<sub>4</sub>) and evaporation of the solvent gave a residue that was purified by silica gel column chromatography using hexane and ethyl acetate as eluent to give **g**.

**Step-5:** To a solution of **g** (1 mmol, 1 equiv, 269 mg) in toluene (5 mL), was added dimethyl malonate (1.1 mmol, 1.1 equiv, 145 mg), piperidine (0.1 mmol, 0.1 equiv, 8.5 mg) and AcOH (0.2 mmol, 0.2 equiv, 12 mg) and the resulting mixture was allowed to stir at 120 °C for 12 h in a pre-heated oil bath under calcium chloride tube. After completion, as monitored by TLC, the solvent was evaporated and the reaction mixture was diluted with ethyl acetate (15 mL) and washed with saturated NaHCO<sub>3</sub> (1 x 10 mL). Drying (Na<sub>2</sub>SO<sub>4</sub>) and evaporation of the solvent gave a residue that was purified by silica gel column chromatography using hexane and ethyl acetate as eluent to give **1m**.

**Dimethyl 2-((6-(3-chlorophenyl)-1-methyl-1H-indol-4-yl)methylene)malonate 1m.** Analytical TLC on silica gel, 1:9 ethyl acetate/hexane  $R_f$  = 0.48; yellow sticky liquid; yield 61% (233 mg); <sup>1</sup>H NMR (500 MHz, CDCl<sub>3</sub>) δ 8.27 (s, 1H), 7.59 (s, 1H), 7.53 (s, 1H), 7.49-7.48 (m, 2H), 7.39-7.36 (m, 1H), 7.32-7.30 (m, 1H), 7.19 (s, 1H), 6.65 (s, 1H), 3.88 (d,  $J$  = 10.5 Hz, 6H), 3.81 (s, 3H); <sup>13</sup>C NMR (125 MHz, CDCl<sub>3</sub>) δ 167.5, 164.9, 143.6, 140.9, 137.5, 134.8, 133.8, 131.3, 130.2, 128.7, 127.5, 127.0, 125.7, 125.5, 125.3, 119.0, 110.4, 99.4, 52.8, 33.2; FT-IR (KBr) 2950, 2923, 2853, 1724, 1594, 1434, 1220, 1075, 751 cm<sup>-1</sup>; HRMS (ESI)  $m/z$  [M+H]<sup>+</sup> calcd for C<sub>21</sub>H<sub>19</sub>ClNO<sub>4</sub>: 384.0997, found: 384.0976.

### Scheme S3. Procedure for the Synthesis of 1n.

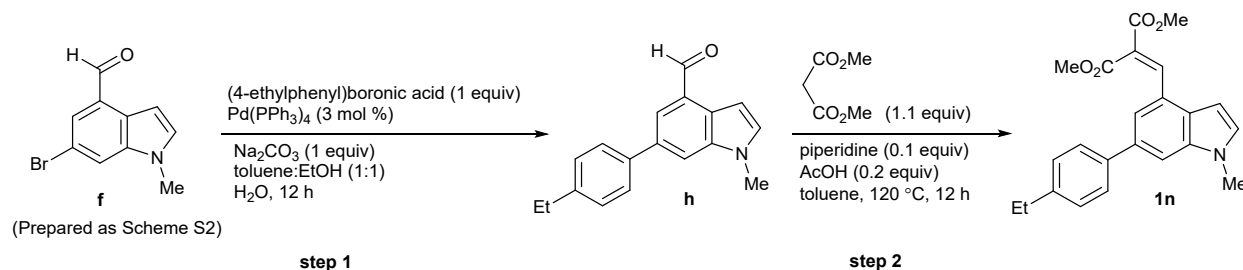

**Step-1:** To a solution of **f** (2 mmol, 1 equiv, 474 mg, prepared as described in Scheme S2) in toluene/EtOH (1:1, 6 mL), was added (4-ethylphenyl)boronic acid (2 mmol, 1 equiv, 300 mg), Pd(PPh<sub>3</sub>)<sub>4</sub> (3 mol %, 0.03 equiv, 34 mg), Na<sub>2</sub>CO<sub>3</sub> (2 mmol, 1 equiv, 212 mg) and H<sub>2</sub>O (100  $\mu$ L). The mixture was stirred at 100 °C for 12 h in a pre-heated oil bath under nitrogen atmosphere. After 12 h, the reaction mixture was cooled to room temperature and diluted with ethyl acetate (10 mL) and washed with brine (1 x 10 mL). Drying (Na<sub>2</sub>SO<sub>4</sub>) and evaporation of the solvent gave a residue that was purified by silica gel column chromatography using hexane and ethyl acetate as eluent to give **h**.

**Step-2:** To a solution of **h** (1 mmol, 1 equiv, 263 mg) in toluene (5 mL), was added dimethyl malonate (1.1 mmol, 1.1 equiv, 145 mg), piperidine (0.1 mmol, 0.1 equiv, 8.5 mg) and AcOH (0.2 mmol, 0.2 equiv, 12 mg) and the resulting mixture was allowed to stir at 120 °C for 12 h in a pre-heated oil bath under calcium chloride tube. After completion, as monitored by TLC, the solvent was evaporated and the reaction mixture was diluted with ethyl acetate (15 mL) and washed with saturated NaHCO<sub>3</sub> solution (1 x 10 mL). Drying (Na<sub>2</sub>SO<sub>4</sub>) and evaporation of the solvent gave a residue that was purified by silica gel column chromatography using hexane and ethyl acetate as eluent to give **1n**.

**Dimethyl 2-((6-(4-ethylphenyl)-1-methyl-1H-indol-4-yl)methylene)malonate 1n.** Analytical TLC on silica gel, 1:9 ethyl acetate/hexane  $R_f$  = 0.51; orange sticky liquid; yield 63% (237 mg); <sup>1</sup>H NMR (400 MHz, CDCl<sub>3</sub>)  $\delta$  8.30 (s, 1H), 7.57-7.54 (m, 4H), 7.31-7.29 (m, 2H), 7.15-7.14 (m, 1H), 6.65-6.64 (m, 1H), 3.89 (s, 3H), 3.82 (s, 6H), 2.75 (q,  $J$  = 7.6 Hz, 2H), 1.30 (t,  $J$  = 7.6 Hz, 3H); <sup>13</sup>C NMR (125 MHz, CDCl<sub>3</sub>)  $\delta$  167.6, 164.9, 143.2, 141.2, 139.0, 137.5, 135.2, 130.8, 128.4, 128.1, 127.2, 125.2, 125.0, 119.1, 110.3, 99.2, 52.7, 52.6, 33.1, 28.5, 15.6; FT-IR (KBr) 2950,

2924, 2855, 1728, 1506, 1435, 1301, 1258, 1075  $\text{cm}^{-1}$ ; HRMS (ESI)  $m/z$   $[\text{M}+\text{H}]^+$  calcd for  $\text{C}_{23}\text{H}_{24}\text{NO}_4$ : 378.1700, found: 378.1688.

#### Scheme S4. Procedure for the Synthesis of 1o.

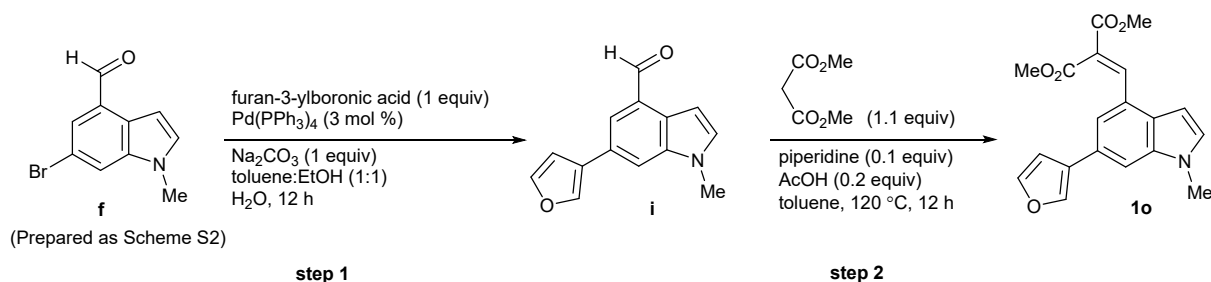

**Step-1:** To a solution of **f** (2 mmol, 1 equiv, 474 mg, prepared as described in Scheme S2) in toluene/EtOH (1:1, 6 mL), was added furan-3-ylboronic acid (2 mmol, 1 equiv, 222 mg),  $\text{Pd}(\text{PPh}_3)_4$  (3 mol %, 0.03 equiv, 34 mg),  $\text{Na}_2\text{CO}_3$  (2 mmol, 1 equiv, 212 mg) and  $\text{H}_2\text{O}$  (100  $\mu\text{L}$ ). The mixture was stirred at 100  $^\circ\text{C}$  for 12 h in a pre-heated oil bath under nitrogen atmosphere. After 12 h, the reaction mixture was cooled to room temperature and diluted with ethyl acetate (10 mL) and washed with brine (1 x 10 mL). Drying ( $\text{Na}_2\text{SO}_4$ ) and evaporation of the solvent gave a residue that was purified by silica gel column chromatography using hexane and ethyl acetate as eluent to give **i**.

**Step-2:** To a solution of **i** (1 mmol, 1 equiv, 225 mg) in toluene (5 mL), was added dimethyl malonate (1.1 mmol, 1.1 equiv, 145 mg), piperidine (0.1 mmol, 0.1 equiv, 8.5 mg) and AcOH (0.2 mmol, 0.2 equiv, 12 mg) and the resulting mixture was allowed to stir at 120  $^\circ\text{C}$  for 12 h in a pre-heated oil bath under calcium chloride guard tube. After completion, as monitored by TLC, the solvent was evaporated and the residue was diluted with ethyl acetate (15 mL) and washed with saturated  $\text{NaHCO}_3$  solution (1 x 10 mL). Drying ( $\text{Na}_2\text{SO}_4$ ) and evaporation of the solvent gave a residue that was purified by silica gel column chromatography using hexane and ethyl acetate as eluent to give **1o**.

**Dimethyl 2-((6-(furan-3-yl)-1-methyl-1H-indol-4-yl)methylene)malonate 1o.** Analytical TLC on silica gel, 1:9 ethyl acetate/hexane  $R_f$  = 0.40; yellow sticky liquid; yield 53% (180 mg);  $^1\text{H}$  NMR (400 MHz,  $\text{CDCl}_3$ )  $\delta$  8.25 (s, 1H), 7.748-7.743 (m, 1H), 7.49 (t,  $J$  = 1.6 Hz, 1H), 7.44-7.43 (m, 2H), 7.13 (d,  $J$  = 3.2 Hz, 1H), 6.739-6.732 (m, 1H), 6.617-6.610 (m, 1H), 3.88 (s, 3H), 3.81

(s, 3H), 3.79 (s, 3H);  $^{13}\text{C}$  NMR (125 MHz,  $\text{CDCl}_3$ )  $\delta$  167.6, 164.8, 143.8, 141.0, 138.2, 137.4, 130.7, 128.1, 127.0, 126.2, 125.5, 125.2, 117.9, 109.1, 108.9, 99.4, 52.8, 52.7, 33.1; FT-IR (KBr) 2951, 2924, 2852, 1724, 1614, 1508, 1435, 1299, 1072, 1059, 1025, 869  $\text{cm}^{-1}$ ; HRMS (ESI)  $m/z$   $[\text{M}+\text{H}]^+$  calcd for  $\text{C}_{19}\text{H}_{18}\text{NO}_5$ : 340.1179, found: 340.1175.

**Scheme S5. Synthesis of Dimethyl 2-((1H-indol-4-yl)methylene)malonate 1q.**

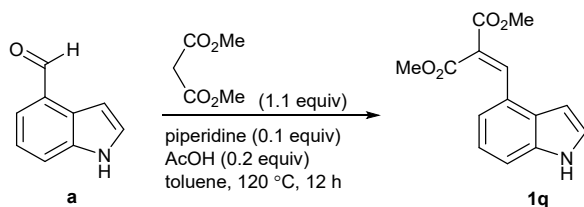

To a solution of 1H-indole-4-carbaldehyde **a** (1 mmol, 1 equiv, 145 mg) in toluene (5 mL), was added dimethyl malonate (1.1 mmol, 1.1 equiv, 145 mg), piperidine (0.1 mmol, 0.1 equiv, 8.5 mg) and AcOH (0.2 mmol, 0.2 equiv, 12 mg) and the resulting mixture was allowed to stir at 120 °C for 12 h in a pre-heated oil bath under calcium chloride tube. After completion, as monitored by TLC, the solvent was evaporated and the reaction mixture was diluted with ethyl acetate (15 mL) and washed with saturated  $\text{NaHCO}_3$  solution (1 x 10 mL). Drying ( $\text{Na}_2\text{SO}_4$ ) and evaporation of the solvent gave a residue that was purified by silica gel column chromatography using hexane and ethyl acetate as eluent to give **1q**. Analytical TLC on silica gel, 1:9 ethyl acetate/hexane  $R_f$  = 0.30; green sticky liquid; yield 85% (220 mg);  $^1\text{H}$  NMR (400 MHz,  $\text{CDCl}_3$ )  $\delta$  8.47 (s, 1H), 8.29 (s, 1H), 7.46 (d,  $J$  = 8 Hz, 1H), 7.31-7.27 (m, 2H), 7.19-7.15 (m, 1H), 6.72-6.71 (m, 1H), 3.89 (s, 3H), 3.82 (s, 3H);  $^{13}\text{C}$  NMR (125 MHz,  $\text{CDCl}_3$ )  $\delta$  167.8, 165.0, 141.4, 136.0, 125.7, 124.9, 124.8, 122.1, 119.7, 113.8, 100.9, 52.78, 52.75; FT-IR (KBr) 2950, 2924, 2855, 1728, 1506, 1435, 1301, 1075  $\text{cm}^{-1}$ ; HRMS (ESI)  $m/z$   $[\text{M}+\text{H}]^+$  calcd for  $\text{C}_{14}\text{H}_{14}\text{NO}_4$ : 260.0917, found: 260.0918.

**Scheme S6. General Procedure for the Synthesis of Oxiranes.<sup>2</sup>**

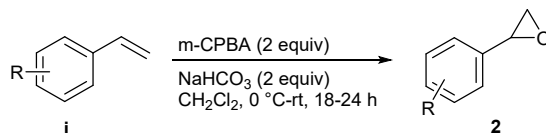

Styrene **i** (2 mmol, 1 equiv) was dissolved in  $\text{CH}_2\text{Cl}_2$  (5 mL) in a 25 mL double neck round-bottom flask under nitrogen atmosphere.  $\text{NaHCO}_3$  (4 mmol, 2 equiv, 336 mg) was added to the flask in

one portion and the reaction was cooled to 0 °C in an ice bath. The flask was fitted with an addition funnel containing *m*-CPBA (4 mmol, 2 equiv, 688 mg) dissolved in CH<sub>2</sub>Cl<sub>2</sub> (10 mL), adding dropwise over 15 minutes. The resultant mixture was stirred at 0 °C for an additional 15 minutes and then allowed to warm up to room temperature and stirred overnight. The resulting mixture was washed twice each with saturated aqueous Na<sub>2</sub>CO<sub>3</sub> (5 mL) and Na<sub>2</sub>S<sub>2</sub>O<sub>3</sub> (5 mL) and extracted using CH<sub>2</sub>Cl<sub>2</sub> (3 x 10 mL). Drying (Na<sub>2</sub>SO<sub>4</sub>) and evaporation of the solvent gave a residue that was purified by silica gel column chromatography using hexane and ethyl acetate as an eluent to afford the oxiranes **2b-e**, **2g-h**, **2j-m** and **2o**.

Oxiranes **2f**<sup>2</sup>, **2i**<sup>2</sup> and **2n**<sup>2b</sup> are known and were prepared according to the reported procedure. Oxirane **2k** is new and its complete characterization data is given.

#### Scheme S7. Procedure for the Synthesis of Oxirane **2k**.

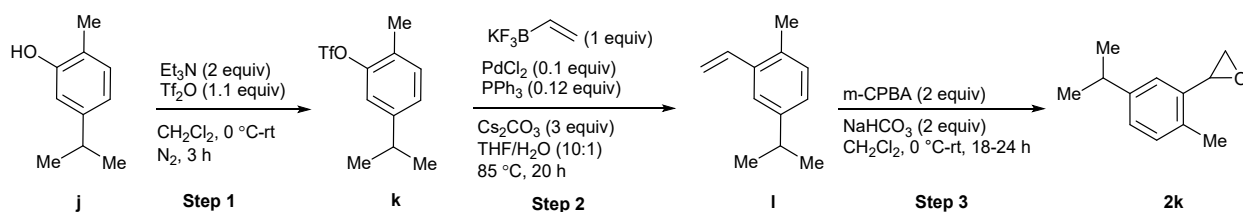

**Step-1:** To a solution of carvacrol **j** (3 mmol, 1 equiv, 450 mg) in CH<sub>2</sub>Cl<sub>2</sub> (10 mL) at room temperature, was added Et<sub>3</sub>N (6 mmol, 2 equiv, 606 mg) under nitrogen atmosphere and the resulting mixture was allowed to cool to 0 °C. Then, Tf<sub>2</sub>O (3.3 mmol, 1.1 equiv, 930 mg) was added dropwise over a period of 5 minutes. The mixture was allowed to warm up to room temperature and stirred for an additional 3 hours under nitrogen atmosphere. After complete consumption of starting materials, as monitored by TLC, the reaction mixture was diluted with CH<sub>2</sub>Cl<sub>2</sub> (10 mL), washed with saturated NH<sub>4</sub>Cl (1 x 20 mL) and the aqueous layer was extracted using CH<sub>2</sub>Cl<sub>2</sub> (2 x 20 mL). Drying (Na<sub>2</sub>SO<sub>4</sub>) and evaporation of the solvent gave a residue that was purified on silica gel column chromatography using hexane and ethyl acetate as eluent to give **k**.<sup>2f</sup>

**Step-2:** An oven dried pressure tube was charged with **k** (2 mmol, 1 equiv, 564 mg), potassium vinyltrifluoroborate (2 mmol, 1 equiv, 268 mg), PdCl<sub>2</sub> (0.2 mmol, 0.1 equiv, 35 mg), PPh<sub>3</sub> (0.24 mmol, 0.12 equiv, 62 mg), Cs<sub>2</sub>CO<sub>3</sub> (6 mmol, 3 equiv, 1956 mg) and THF (6 mL). Then, 0.6 mL

H<sub>2</sub>O was added and the reaction mixture was flushed with nitrogen and allowed to stir at 85 °C for 20 h in a pre-heated oil bath under nitrogen atmosphere. After completion, the resulting mixture was cooled to room temperature, diluted with CH<sub>2</sub>Cl<sub>2</sub> (10 mL) and washed with H<sub>2</sub>O (5 mL). The aqueous layer was extracted using CH<sub>2</sub>Cl<sub>2</sub> (2 x 20 mL). Drying (Na<sub>2</sub>SO<sub>4</sub>) and evaporation of the solvent gave a residue that was purified on silica gel column chromatography using hexane and ethyl acetate as eluent to give **1**.<sup>2f</sup>

**Step-3:** Styrene **1** (1 mmol, 1 equiv, 160 mg) was dissolved in CH<sub>2</sub>Cl<sub>2</sub> (5 mL) in a 25 mL double neck round-bottom flask under nitrogen atmosphere. NaHCO<sub>3</sub> (2 mmol, 2 equiv, 168 mg) was added to the flask in one portion and the reaction was cooled to 0 °C in an ice bath. The flask was then fitted with an addition funnel containing *m*-CPBA (2 mmol, 2 equiv, 344 mg) dissolved in CH<sub>2</sub>Cl<sub>2</sub> (5 mL), adding dropwise over 10 minutes. The reaction mixture was stirred at 0 °C for an additional 15 minutes and then allowed to warm up to room temperature and stirred overnight. The resulting mixture was successively washed with saturated aqueous Na<sub>2</sub>CO<sub>3</sub> (2 x 5 mL) and Na<sub>2</sub>S<sub>2</sub>O<sub>3</sub> (2 x 5 mL) and extracted with CH<sub>2</sub>Cl<sub>2</sub> (2 x 10 mL). Drying (Na<sub>2</sub>SO<sub>4</sub>) and evaporation of the solvent gave a residue that was purified by silica gel column chromatography using hexane and ethyl acetate as an eluent to afford the oxirane **2k**.

**2-(5-Isopropyl-2-methylphenyl)oxirane 2k.** Analytical TLC on silica gel, 1:49 ethyl acetate/hexane *R<sub>f</sub>* = 0.55; colorless liquid; yield 91% (160 mg); <sup>1</sup>H NMR (400 MHz, CDCl<sub>3</sub>) δ 7.075-7.070 (m, 3H), 3.99-3.97 (m, 1H), 3.15-3.13 (m, 1H), 2.89-2.82 (m, 1H), 2.70 (dd, *J* = 6, 2.8 Hz, 1H), 2.37 (s, 3H), 1.22-1.20 (m, 6H); <sup>13</sup>C NMR (125 MHz, CDCl<sub>3</sub>) δ 147.0, 135.7, 133.5, 129.9, 125.7, 122.2, 50.7, 50.2, 33.9, 24.17, 24.11, 18.4; FT-IR (KBr) 2960, 1729, 1500, 1460, 1382, 1177, 882, 822 cm<sup>-1</sup>; HRMS (ESI) *m/z* [M+H]<sup>+</sup> calcd for C<sub>12</sub>H<sub>17</sub>O: 177.1274, found: 177.1260.

**General Procedure for the Synthesis of (±)-3aa-oa.** Indolyl malonate **1** (0.2 mmol, 1 equiv), oxirane **2** (0.24 mmol, 1.2 equiv), Co(OAc)<sub>2</sub>•4H<sub>2</sub>O (0.01 mmol, 0.1 equiv, 2.49 mg) and 4 Å molecular sieves (100 mg) were stirred in CH<sub>2</sub>Cl<sub>2</sub> (3 mL) at 50 °C for 4 h in a pre-heated oil bath under calcium chloride tube. Then, KO<sup>t</sup>Bu (0.2 mmol, 1 equiv, 22 mg) was added and the resulting mixture was stirred at the same temperature for an additional 5 h. After completion, as monitored by TLC, the reaction mixture was allowed to cool to room temperature and diluted with CH<sub>2</sub>Cl<sub>2</sub>

(5 mL) and passed through a short pad of celite using CH<sub>2</sub>Cl<sub>2</sub> (10 mL). Drying (Na<sub>2</sub>SO<sub>4</sub>) and evaporation of the solvent gave a residue that was purified on silica gel column chromatography using ethyl acetate and hexane as an eluent to afford (±)-**3**.

**General Procedure for the Enantiospecific Synthesis of 3aa', 3af', 3ai', 3ba' and 3ha'.** Indole **1** (0.2 mmol, 1 equiv), enantioenriched oxirane **2'** (0.24 mmol, 1.2 equiv), Co(OAc)<sub>2</sub>•4H<sub>2</sub>O (0.01 mmol, 0.1 equiv, 2.49 mg) and 4 Å molecular sieves (100 mg) were stirred in CH<sub>2</sub>Cl<sub>2</sub> (3 mL) at 50 °C for 4 h in a pre-heated oil bath under calcium chloride tube. Then, KO<sup>t</sup>Bu (0.2 mmol, 1 equiv, 22 mg) was added and the resulting mixture was stirred at the same temperature for an additional 5 h. The purification was performed as above presented general procedure. The enantiomeric excess was determined using chiral HPLC.

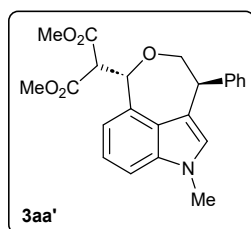

**Dimethyl 2-((1*S*,4*S*)-6-methyl-4-phenyl-1,3,4,6-tetrahydrooxepino[5,4,3-*cd*]indol-1-yl)malonate 3aa'.** Analytical TLC on silica gel, 1:9 ethyl acetate/hexane *R<sub>f</sub>* = 0.60; yellow sticky liquid; yield 71% (55 mg); <sup>1</sup>H NMR (400 MHz, CDCl<sub>3</sub>) δ 7.34-7.26 (m, 5H), 7.25-7.22 (m, 1H), 7.17 (t, *J* = 7.6 Hz, 1H), 6.77 (d, *J* = 7.6 Hz, 1H), 6.479-6.475 (m, 1H), 5.62 (d, *J* = 6 Hz, 1H), 4.53-4.48 (m, 1H), 4.41-4.36 (m, 2H), 3.90-3.86 (m, 1H), 3.83 (s, 3H), 3.68 (s, 3H), 3.65 (s, 3H); <sup>13</sup>C NMR (100 MHz, CDCl<sub>3</sub>) δ 168.6, 167.5, 142.1, 137.5, 134.8, 128.8, 128.7, 128.5, 127.0, 125.1, 121.3, 118.4, 114.4, 108.7, 82.9, 79.1, 57.6, 53.0, 52.5, 47.6, 32.9; FT-IR (KBr) 2950, 1736, 1454, 1300, 1246, 1155, 744, 702 cm<sup>-1</sup>; HRMS (ESI) *m/z* [M+H]<sup>+</sup> calcd for C<sub>23</sub>H<sub>24</sub>NO<sub>5</sub>: 394.1649, found: 394.1651; [α]<sub>D</sub><sup>25</sup> = +30 (c = 0.01, CHCl<sub>3</sub>); HPLC: *ee* for major diastereomer = 98% *ee* [CHIRALPAK AD-H, hexane/*i*PrOH = 80:20, flow rate: 1 mL/min, λ = 254 nm, *t<sub>R</sub>* = 8.40 min (major), 10.73 min (minor)].

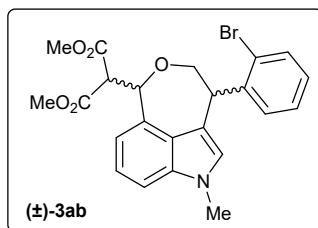

**Dimethyl 2-(4-(2-bromophenyl)-6-methyl-1,3,4,6-tetrahydrooxepino[5,4,3-cd]indol-1-yl)malonate (±)-3ab.** Analytical TLC on silica gel, 1:9 ethyl acetate/hexane  $R_f = 0.54$ ; brown sticky liquid;; yield 61% (57 mg); mixture of diastereomers (dr = 4:1);  $^1\text{H}$  NMR (400 MHz,  $\text{CDCl}_3$ )  $\delta$  7.61-7.59 (m, 1H), 7.54-7.52 (m, 0.26H), 7.25-7.19 (m, 2.16H), 7.18-7.15 (m, 3H), 7.12-7.07 (m, 1.25H), 7.03-6.99 (m, 0.28H), 6.81-6.79 (m, 0.28H), 6.78 (s, 0.25H), 6.77 (d,  $J = 7.2$  Hz, 1H), 6.50-6.49 (m, 1H), 5.72 (d,  $J = 6$  Hz, 0.25H), 5.64 (d,  $J = 6$  Hz, 1H), 5.07-5.03 (m, 1H), 5.00-4.98 (m, 0.27H), 4.51-4.47 (m, 0.28H), 4.45-4.41 (m, 1H), 4.39 (d,  $J = 6$  Hz, 1H), 4.35 (d,  $J = 5.6$  Hz, 1H), 4.16-4.13 (m, 0.28H), 3.91-3.83 (m, 4H), 3.77 (s, 0.75H), 3.72 (s, 0.74H), 3.69 (s, 3H), 3.67 (s, 3H), 3.61 (s, 0.73H);  $^{13}\text{C}$  NMR (100 MHz,  $\text{CDCl}_3$ )  $\delta$  168.56, 168.50, 167.56, 167.50, 143.8, 137.5, 137.4, 134.8, 134.7, 132.3, 132.2, 128.4, 128.1, 127.87, 127.84, 127.6, 127.1, 125.9, 125.1, 124.7, 123.6, 121.4, 121.3, 117.2, 116.4, 114.9, 114.5, 108.8, 108.7, 83.1, 82.2, 74.9, 57.7, 57.6, 53.0, 52.8, 52.6, 52.5, 45.0, 32.9; FT-IR (KBr) 2924, 2853, 1736, 1435, 1244, 1155, 745  $\text{cm}^{-1}$ ; HRMS (ESI)  $m/z$   $[\text{M}+\text{Na}]^+$  calcd for  $\text{C}_{23}\text{H}_{22}\text{BrNNaO}_5$ : 494.0574, found: 494.0564.

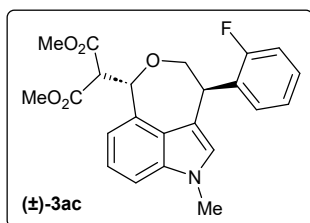

**Dimethyl 2-(4-(2-fluorophenyl)-6-methyl-1,3,4,6-tetrahydrooxepino[5,4,3-cd]indol-1-yl)malonate (±)-3ac.** Analytical TLC on silica gel, 1:9 ethyl acetate/hexane  $R_f = 0.51$ ; yellow sticky liquid; yield 65% (53 mg);  $^1\text{H}$  NMR (400 MHz,  $\text{CDCl}_3$ )  $\delta$  7.25-7.20 (m, 3H), 7.16 (t,  $J = 7.6$  Hz, 1H), 7.09-7.04 (m, 2H), 6.77 (d,  $J = 7.2$  Hz, 1H), 6.497-6.494 (m, 1H), 5.63 (d,  $J = 6$  Hz, 1H), 4.85 (dd,  $J = 10.8, 4.4$  Hz, 1H), 4.43-4.39 (m, 2H), 3.99-3.93 (m, 1H), 3.83 (s, 3H), 3.68 (s, 3H), 3.65 (s, 3H);  $^{13}\text{C}$  NMR (100 MHz,  $\text{CDCl}_3$ )  $\delta$  168.6, 167.5, 162.3 (d,  $J_{\text{C-F}} = 245$  Hz), 137.6, 134.7, 130.8 (d,  $J_{\text{C-F}} = 4.7$  Hz), 128.8 (d,  $J_{\text{C-F}} = 14.3$  Hz), 128.6 (d,  $J_{\text{C-F}} = 8.1$  Hz), 127.8, 124.9, 124.2 (d,

$J_{C-F} = 3.5$  Hz), 121.3, 117.2, 115.8 (d,  $J_{C-F} = 22.3$  Hz), 114.5, 108.7, 82.9, 57.6, 53.0, 52.6, 40.6, 32.9;  $^{19}\text{F}$  NMR (376 MHz,  $\text{CDCl}_3$ )  $\delta$  -119.5; FT-IR (KBr) 2924, 1736, 1454, 1247, 1155, 748  $\text{cm}^{-1}$ ; HRMS (ESI)  $m/z$   $[\text{M}+\text{Na}]^+$  calcd for  $\text{C}_{23}\text{H}_{22}\text{FNNaO}_5$ : 434.1374, found: 434.1363.

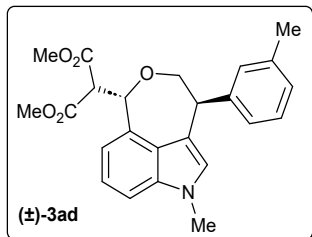

**Dimethyl 2-(6-methyl-4-(m-tolyl)-1,3,4,6-tetrahydrooxepino[5,4,3-cd]indol-1-yl)malonate** (±)-**3ad**. Analytical TLC on silica gel, 1:9 ethyl acetate/hexane  $R_f = 0.61$ ; yellow sticky liquid; yield 62% (50 mg);  $^1\text{H}$  NMR (400 MHz,  $\text{CDCl}_3$ )  $\delta$  7.24-7.20 (m, 2H), 7.18-7.14 (m, 1H), 7.08-7.06 (m, 3H), 6.76 (d,  $J = 7.2$  Hz, 1H), 6.487-6.483 (m, 1H), 5.61 (d,  $J = 5.6$  Hz, 1H), 4.48-4.44 (m, 1H), 4.41-4.35 (m, 2H), 3.89-3.86 (m, 1H), 3.83 (s, 3H), 3.68 (s, 3H), 3.64 (s, 3H), 2.32 (s, 3H);  $^{13}\text{C}$  NMR (125 MHz,  $\text{CDCl}_3$ )  $\delta$  168.6, 167.5, 142.1, 138.1, 137.5, 134.9, 129.6, 128.6, 128.4, 127.7, 126.0, 125.1, 121.2, 118.6, 114.4, 108.7, 82.9, 79.2, 57.7, 53.0, 52.5, 47.5, 32.9, 21.5; FT-IR (KBr) 2924, 2855, 1737, 1455, 1123, 747  $\text{cm}^{-1}$ ; HRMS (ESI)  $m/z$   $[\text{M}+\text{Na}]^+$  calcd for  $\text{C}_{24}\text{H}_{25}\text{NNaO}_5$ : 430.1625, found: 430.1624.

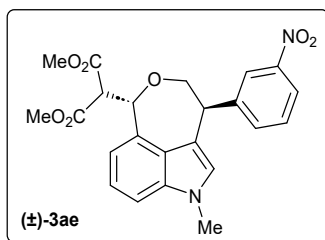

**Dimethyl 2-(6-methyl-4-(3-nitrophenyl)-1,3,4,6-tetrahydrooxepino[5,4,3-cd]indol-1-yl)malonate** (±)-**3ae**. Analytical TLC on silica gel, 1:9 ethyl acetate/hexane  $R_f = 0.48$ ; yellow sticky liquid; yield 77% (67 mg);  $^1\text{H}$  NMR (400 MHz,  $\text{CDCl}_3$ )  $\delta$  8.14-8.11 (m, 2H), 7.63 (d,  $J = 7.6$  Hz, 1H), 7.51-7.47 (m, 1H), 7.27-7.25 (m, 1H), 7.20 (t,  $J = 7.2$  Hz, 1H), 6.80 (d,  $J = 7.2$  Hz, 1H), 6.444-6.441 (m, 1H), 5.65 (d,  $J = 5.6$  Hz, 1H), 4.67-4.62 (m, 1H), 4.41-4.37 (m, 2H), 3.90 (t,  $J = 11.6$  Hz, 1H), 3.83 (s, 3H), 3.70 (s, 3H), 3.64 (s, 3H);  $^{13}\text{C}$  NMR (125 MHz,  $\text{CDCl}_3$ )  $\delta$  168.4, 167.4, 148.6, 144.4, 137.6, 135.2, 134.5, 129.6, 128.3, 124.9, 123.7, 122.2, 121.7, 117.1, 114.8,

108.9, 82.9, 78.2, 57.5, 53.0, 52.5, 47.3, 33.0; FT-IR (KBr) 2924, 2853, 1734, 1525, 1455, 1346, 1245, 1081, 738  $\text{cm}^{-1}$ ; HRMS (ESI)  $m/z$   $[\text{M}+\text{Na}]^+$  calcd for  $\text{C}_{23}\text{H}_{22}\text{N}_2\text{NaO}_7$ : 461.1319, found: 461.1317.

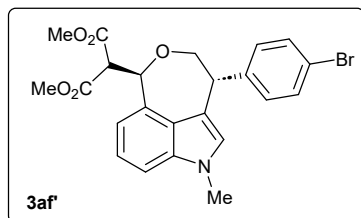

**Dimethyl 2-((1*R*,4*R*)-4-(4-bromophenyl)-6-methyl-1,3,4,6-tetrahydrooxepino[5,4,3-*cd*]indol-1-yl)malonate 3af**. Analytical TLC on silica gel, 1:9 ethyl acetate/hexane  $R_f$  = 0.65; brown sticky liquid; yield 70% (65 mg);  $^1\text{H}$  NMR (400 MHz,  $\text{CDCl}_3$ )  $\delta$  7.45 (d,  $J$  = 8.4 Hz, 2H), 7.24-7.22 (m, 1H), 7.19-7.14 (m, 3H), 6.77 (d,  $J$  = 7.6 Hz, 1H), 6.459-6.455 (m, 1H), 5.61 (d,  $J$  = 5.6 Hz, 1H), 4.49-4.45 (m, 1H), 4.40-4.32 (m, 2H), 3.86-3.82 (m, 4H), 3.68 (s, 3H), 3.64 (s, 3H);  $^{13}\text{C}$  NMR (125 MHz,  $\text{CDCl}_3$ )  $\delta$  168.5, 167.4, 141.2, 137.6, 134.7, 131.7, 130.6, 128.4, 125.0, 121.4, 120.8, 118.0, 114.6, 108.8, 82.9, 78.7, 57.6, 53.0, 52.5, 47.1, 32.9; FT-IR (KBr) 2925, 2855, 1736, 1455, 1299, 1155, 1010, 747  $\text{cm}^{-1}$ ; HRMS (ESI)  $m/z$   $[\text{M}+\text{Na}]^+$  calcd for  $\text{C}_{23}\text{H}_{22}\text{BrNNaO}_5$ : 494.0574, found: 494.0546;  $[\alpha]_D^{25}$  = -25 ( $c$  = 0.04,  $\text{CHCl}_3$ ); HPLC: *ee* for major diastereomer = 95% *ee* [CHIRALPAK AD-H, hexane/*i*PrOH = 90:10, flow rate: 1 mL/min,  $\lambda$  = 254 nm,  $t_R$  = 25.52 min (minor), 28.50 min (major)].

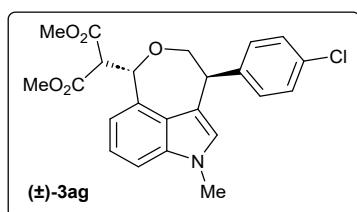

**Dimethyl 2-(4-(4-chlorophenyl)-6-methyl-1,3,4,6-tetrahydrooxepino[5,4,3-*cd*]indol-1-yl)malonate (±)-3ag**. Analytical TLC on silica gel, 1:9 ethyl acetate/hexane  $R_f$  = 0.62; brown sticky liquid; yield 71% (60 mg);  $^1\text{H}$  NMR (400 MHz,  $\text{CDCl}_3$ )  $\delta$  7.30 (d,  $J$  = 8.4 Hz, 2H), 7.25-7.15 (m, 4H), 6.77 (d,  $J$  = 7.2 Hz, 1H), 6.46-6.45 (m, 1H), 5.61 (d,  $J$  = 5.6 Hz, 1H), 4.51-4.47 (m, 1H), 4.40 (d,  $J$  = 5.6 Hz, 1H), 4.36 (dd,  $J$  = 11.6, 4.8 Hz, 1H), 3.86-3.80 (m, 4H), 3.68 (s, 3H), 3.64 (s, 3H);  $^{13}\text{C}$  NMR (150 MHz,  $\text{CDCl}_3$ )  $\delta$  168.5, 167.4, 140.7, 137.6, 134.7, 132.7, 130.2, 128.8,

128.4, 125.0, 121.4, 118.1, 114.5, 108.7, 82.9, 78.7, 57.6, 53.0, 52.5, 47.0, 32.9; FT-IR (KBr) 2951, 2863, 1734, 1488, 1298, 1155, 749  $\text{cm}^{-1}$ ; HRMS (ESI)  $m/z$   $[\text{M}+\text{Na}]^+$  calcd for  $\text{C}_{23}\text{H}_{22}\text{ClNNaO}_5$ : 450.1079, found: 450.1074.

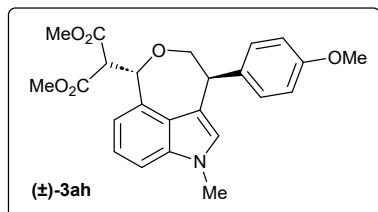

**Dimethyl 2-(4-(4-methoxyphenyl)-6-methyl-1,3,4,6-tetrahydrooxepino[5,4,3-cd]indol-1-yl)malonate (±)-3ah.** Analytical TLC on silica gel, 1:9 ethyl acetate/hexane  $R_f$  = 0.60; yellow sticky liquid; yield 67% (56 mg);  $^1\text{H}$  NMR (400 MHz,  $\text{CDCl}_3$ )  $\delta$  7.24-7.14 (m, 4H), 6.87 (d,  $J$  = 8.4 Hz, 2H), 6.76 (d,  $J$  = 7.6 Hz, 1H), 6.487-6.483 (m, 1H), 5.60 (d,  $J$  = 5.6 Hz, 1H), 4.48-4.43 (m, 1H), 4.41 (d,  $J$  = 5.6 Hz, 1H), 4.35 (dd,  $J$  = 11.6, 4.8 Hz, 1H), 3.86-3.82 (m, 4H), 3.81 (s, 3H), 3.68 (s, 3H), 3.64 (s, 3H);  $^{13}\text{C}$  NMR (100 MHz,  $\text{CDCl}_3$ )  $\delta$  168.6, 167.5, 158.5, 137.5, 134.8, 134.2, 129.8, 128.5, 125.0, 121.2, 118.8, 114.3, 113.9, 108.7, 82.8, 79.3, 57.6, 55.3, 53.0, 52.5, 46.8, 32.9; FT-IR (KBr) 2924, 2853, 1736, 1609, 1509, 1455, 1301, 1248, 748  $\text{cm}^{-1}$ ; HRMS (ESI)  $m/z$   $[\text{M}+\text{Na}]^+$  calcd for  $\text{C}_{24}\text{H}_{25}\text{NNaO}_6$ : 446.1574, found: 446.1584.

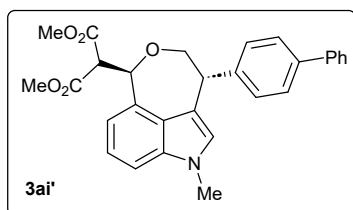

**Dimethyl 2-((1R,4R)-4-([1,1'-biphenyl]-4-yl)-6-methyl-1,3,4,6-tetrahydrooxepino[5,4,3-cd]indol-1-yl)malonate 3ai'.** Analytical TLC on silica gel, 1:9 ethyl acetate/hexane  $R_f$  = 0.63; colorless sticky liquid; yield 69% (64 mg);  $^1\text{H}$  NMR (500 MHz,  $\text{CDCl}_3$ )  $\delta$  7.61 (d,  $J$  = 7.5 Hz, 2H), 7.56 (d,  $J$  = 8 Hz, 2H), 7.44 (t,  $J$  = 7.5 Hz, 2H), 7.35 (d,  $J$  = 7.5 Hz, 3H), 7.24 (s, 1H), 7.18 (t,  $J$  = 7.5 Hz, 1H), 6.78 (d,  $J$  = 7 Hz, 1H), 6.54 (s, 1H), 5.64 (d,  $J$  = 5.5 Hz, 1H), 4.57-4.54 (m, 1H), 4.44-4.40 (m, 2H), 3.91 (t,  $J$  = 11.5 Hz, 1H), 3.84 (s, 3H), 3.70 (s, 3H), 3.65 (s, 3H);  $^{13}\text{C}$  NMR (125 MHz,  $\text{CDCl}_3$ )  $\delta$  168.6, 167.5, 141.2, 141.0, 139.9, 137.6, 134.9, 129.3, 128.9, 128.6, 127.3, 127.1, 125.1, 121.3, 118.4, 114.5, 108.7, 82.9, 79.0, 57.7, 53.0, 52.5, 47.3, 32.9; FT-IR (KBr) 2923, 2852,

1737, 1301, 1340, 1156, 746  $\text{cm}^{-1}$ ; HRMS (ESI)  $m/z$   $[M+Na]^+$  calcd for  $\text{C}_{29}\text{H}_{27}\text{NNaO}_5$ : 492.1781, found: 492.1777;  $[\alpha]_{\text{D}}^{25} = -53.33$  ( $c = 0.03$ ,  $\text{CHCl}_3$ ); HPLC: *ee* for major diastereomer = 96% *ee* [CHIRALPAK AD-H, hexane/*i*PrOH = 90:10, flow rate: 1 mL/min,  $\lambda = 254$  nm,  $t_R = 19.13$  min (minor), 24.99 min (major)].

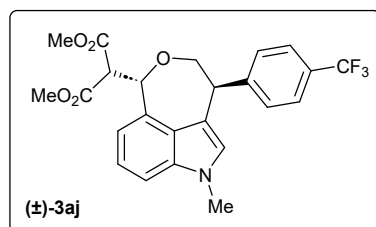

**Dimethyl 2-(6-methyl-4-(4-(trifluoromethyl)phenyl)-1,3,4,6-tetrahydrooxepino[5,4,3-cd]indol-1-yl)malonate (±)-3aj.** Analytical TLC on silica gel, 1:9 ethyl acetate/hexane  $R_f = 0.50$ ; yellow sticky liquid; yield 72% (66 mg);  $^1\text{H}$  NMR (400 MHz,  $\text{CDCl}_3$ )  $\delta$  7.58 (d,  $J = 8$  Hz, 2H), 7.40 (d,  $J = 8$  Hz, 2H), 7.24-7.13 (m, 2H), 6.79 (d,  $J = 7.6$  Hz, 1H), 6.446-6.443 (m, 1H), 5.63 (d,  $J = 5.2$  Hz, 1H), 4.60-4.56 (m, 1H), 4.40-4.35 (m, 2H), 3.87 (t,  $J = 11.6$  Hz, 1H), 3.83 (s, 3H), 3.69 (s, 3H), 3.64 (s, 3H);  $^{13}\text{C}$  NMR (125 MHz,  $\text{CDCl}_3$ )  $\delta$  168.5, 167.4, 146.3, 137.6, 134.7, 129.3, 128.4, 127.6 (q,  $J_{\text{C-F}} = 270$  Hz), 125.6 (q,  $J_{\text{C-F}} = 3.6$  Hz), 125.0, 121.5, 117.6, 114.6, 108.8, 82.9, 78.5, 57.6, 53.0, 52.5, 47.5, 33.0;  $^{19}\text{F}$  NMR (470 MHz,  $\text{CDCl}_3$ )  $\delta$  -62.3; FT-IR (KBr) 2927, 1735, 1485, 1325, 1241, 1046, 735  $\text{cm}^{-1}$ ; HRMS (ESI)  $m/z$   $[M+Na]^+$  calcd for  $\text{C}_{24}\text{H}_{22}\text{F}_3\text{NNaO}_5$ : 484.1342, found: 484.1330.

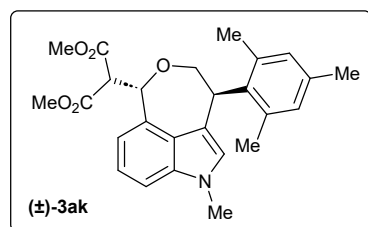

**Dimethyl 2-(4-mesityl-6-methyl-1,3,4,6-tetrahydrooxepino[5,4,3-cd]indol-1-yl)malonate (±)-3ak.** Analytical TLC on silica gel, 1:9 ethyl acetate/hexane  $R_f = 0.64$ ; yellow sticky liquid; yield 60% (52 mg);  $^1\text{H}$  NMR (400 MHz,  $\text{CDCl}_3$ )  $\delta$  7.24-7.22 (m, 1H), 7.15 (t,  $J = 7.6$  Hz, 1H), 6.91 (s, 1H), 6.78 (s, 1H), 6.74 (d,  $J = 7.2$  Hz, 1H), 6.408-6.404 (m, 1H), 5.57 (d,  $J = 6$  Hz, 1H), 4.97-4.93 (m, 1H), 4.42 (d,  $J = 6$  Hz, 1H), 4.32 (dd,  $J = 12, 5.6$  Hz, 1H), 4.12 (t,  $J = 11.6$  Hz, 1H), 3.85 (s,

3H), 3.68 (s, 3H), 3.66 (s, 3H), 2.46 (s, 3H), 2.27 (s, 3H), 1.91 (s, 3H);  $^{13}\text{C}$  NMR (100 MHz,  $\text{CDCl}_3$ )  $\delta$  168.7, 167.7, 137.8, 137.5, 137.4, 136.1, 135.0, 134.5, 131.0, 129.0, 126.8, 124.6, 121.2, 117.6, 114.1, 108.7, 83.4, 76.3, 57.6, 53.1, 52.6, 42.0, 32.8, 22.0, 21.5, 20.9; FT-IR (KBr) 2922, 1739, 1454, 1302, 1156, 744  $\text{cm}^{-1}$ ; HRMS (ESI)  $m/z$   $[\text{M}+\text{Na}]^+$  calcd for  $\text{C}_{26}\text{H}_{29}\text{NNaO}_5$ : 458.1938, found: 458.1935.

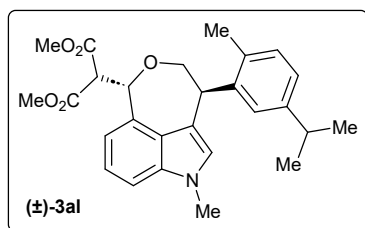

**Dimethyl 2-(4-(5-isopropyl-2-methylphenyl)-6-methyl-1,3,4,6-tetrahydrooxepino[5,4,3-cd]indol-1-yl)malonate (±)-3al.** Analytical TLC on silica gel, 1:9 ethyl acetate/hexane  $R_f$  = 0.62; orange sticky liquid; yield 59% (53 mg);  $^1\text{H}$  NMR (400 MHz,  $\text{CDCl}_3$ )  $\delta$  7.23-7.13 (m, 3H), 7.05-7.02 (m, 1H), 6.98 (s, 1H), 6.77 (d,  $J$  = 7.2 Hz, 1H), 6.427-6.423 (m, 1H), 5.61 (d,  $J$  = 5.6 Hz, 1H), 4.73-4.70 (m, 1H), 4.44 (d,  $J$  = 6 Hz, 1H), 4.38 (dd,  $J$  = 11.6, 4.8 Hz, 1H), 3.92 (t,  $J$  = 11.6 Hz, 1H), 3.85 (s, 3H), 3.67 (s, 3H), 3.66 (s, 3H), 2.39 (s, 3H), 2.80-2.73 (m, 1H), 1.17-1.14 (m, 6H);  $^{13}\text{C}$  NMR (100 MHz,  $\text{CDCl}_3$ )  $\delta$  168.7, 167.6, 146.8, 140.0, 137.6, 134.9, 133.8, 130.4, 128.1, 125.1, 124.5, 121.2, 118.4, 114.2, 108.7, 83.1, 57.5, 53.0, 52.6, 33.8, 32.9, 24.2, 24.1; FT-IR (KBr) 2953, 2922, 2853, 1738, 1455, 1155, 747  $\text{cm}^{-1}$ ; HRMS (ESI)  $m/z$   $[\text{M}+\text{Na}]^+$  calcd for  $\text{C}_{27}\text{H}_{31}\text{NNaO}_5$ : 472.2094, found: 472.2096.

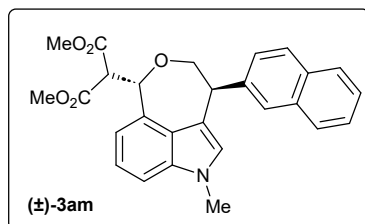

**Dimethyl 2-(6-methyl-4-(naphthalen-2-yl)-1,3,4,6-tetrahydrooxepino[5,4,3-cd]indol-1-yl)malonate (±)-3am.** Analytical TLC on silica gel, 1:9 ethyl acetate/hexane  $R_f$  = 0.55; yellow sticky liquid; yield 66% (58 mg);  $^1\text{H}$  NMR (400 MHz,  $\text{CDCl}_3$ )  $\delta$  7.84-7.78 (m, 4H), 7.50-7.45 (m, 2H), 7.37-7.34 (m, 1H), 7.26-7.24 (m, 1H), 7.19 (t,  $J$  = 7.6 Hz, 1H), 6.80 (d,  $J$  = 7.6 Hz, 1H), 6.47-

6.46 (m, 1H), 5.66 (d,  $J = 5.6$  Hz, 1H), 4.71-4.66 (m, 1H), 4.48-4.44 (m, 1H), 4.44-4.42 (m, 1H), 4.00 (t,  $J = 11.6$  Hz, 1H), 3.84 (s, 3H), 3.664-3.662 (m, 6H);  $^{13}\text{C}$  NMR (150 MHz,  $\text{CDCl}_3$ )  $\delta$  168.6, 167.5, 139.5, 137.6, 134.9, 133.6, 132.7, 128.7, 128.2, 127.8, 127.7, 127.5, 127.1, 126.1, 125.7, 125.1, 121.3, 118.5, 114.5, 108.7, 83.0, 79.0, 57.7, 53.0, 52.5, 47.7, 32.9; FT-IR (KBr) 2922, 2851, 1737, 1454, 1247, 1129, 747  $\text{cm}^{-1}$ ; HRMS (ESI)  $m/z$   $[\text{M}+\text{Na}]^+$  calcd for  $\text{C}_{27}\text{H}_{25}\text{NNaO}_5$ : 466.1625, found: 466.1608.

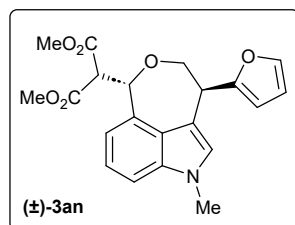

**Dimethyl 2-(4-(furan-2-yl)-6-methyl-1,3,4,6-tetrahydrooxepino[5,4,3-cd]indol-1-yl)malonate** (±)-**3an**. Analytical TLC on silica gel, 1:9 ethyl acetate/hexane  $R_f = 0.41$ ; yellow sticky liquid; yield 60% (46 mg);  $^1\text{H}$  NMR (400 MHz,  $\text{CDCl}_3$ )  $\delta$  7.36-7.35 (m, 1H), 7.23-7.21 (m, 1H), 7.17-7.13 (m, 1H), 6.765-6.761 (m, 1H), 6.75-6.73 (m, 1H), 6.34-6.33 (m, 1H), 6.17 (d,  $J = 3.2$  Hz, 1H), 5.60 (d,  $J = 5.6$  Hz, 1H), 4.70-4.66 (m, 1H), 4.52-4.48 (m, 1H), 4.38 (d,  $J = 5.6$  Hz, 1H), 3.96 (t,  $J = 11.6$  Hz, 1H), 3.83 (s, 3H), 3.72 (s, 3H), 3.64 (s, 3H);  $^{13}\text{C}$  NMR (125 MHz,  $\text{CDCl}_3$ )  $\delta$  168.5, 167.5, 154.9, 141.7, 137.7, 134.5, 127.8, 124.5, 121.4, 115.0, 114.5, 110.1, 108.8, 106.4, 82.8, 76.4, 57.7, 53.0, 52.5, 40.7, 33.0; FT-IR (KBr) 2922, 2851, 1736, 1456, 1155, 745  $\text{cm}^{-1}$ ; HRMS (ESI)  $m/z$   $[\text{M}+\text{Na}]^+$  calcd for  $\text{C}_{21}\text{H}_{21}\text{NNaO}_6$ : 406.1261, found: 406.1269.

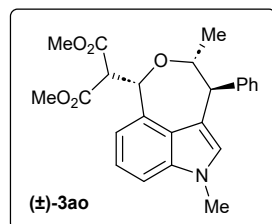

**Dimethyl 2-(3,6-dimethyl-4-phenyl-1,3,4,6-tetrahydrooxepino[5,4,3-cd]indol-1-yl)malonate** (±)-**3ao**. Analytical TLC on silica gel, 1:9 ethyl acetate/hexane  $R_f = 0.57$ ; yellow sticky liquid; yield 68% (55 mg); mixture of diastereomers (dr = 3.8:1);  $^1\text{H}$  NMR (400 MHz,  $\text{CDCl}_3$ )  $\delta$  7.31-7.29 (m, 2.89H), 7.21-7.19 (m, 3.81H), 7.17-7.13 (m, 3.15H), 6.78 (s, 1H), 6.75 (d,  $J = 7.2$  Hz, 1H),

6.70 (d,  $J = 7.2$  Hz, 0.27H), 6.31 (s, 0.26H), 5.67 (d,  $J = 5.2$  Hz, 1H), 4.44-4.40 (m, 1H), 4.38 (d,  $J = 5.2$  Hz, 1H), 4.35 (d,  $J = 6.8$  Hz, 0.32H), 4.21-4.20 (m, 1H), 4.069-4.062 (m, 0.35H), 3.87 (s, 0.79H), 3.81 (s, 3H), 3.68 (s, 0.80H), 3.67 (s, 3H), 3.64 (s, 0.80H), 3.62 (s, 3H), 1.07-1.06 (m, 3.84H);  $^{13}\text{C}$  NMR (125 MHz,  $\text{CDCl}_3$ )  $\delta$  168.9, 168.7, 167.7, 167.6, 144.0, 143.7, 137.4, 137.3, 135.4, 135.3, 130.0, 129.2, 129.1, 128.5, 128.0, 127.6, 126.7, 126.0, 125.6, 125.1, 121.3, 121.1, 119.5, 118.6, 114.3, 114.0, 108.5, 108.4, 84.9, 82.1, 81.3, 58.3, 58.2, 54.0, 52.9, 52.7, 52.4, 52.3, 51.1, 32.8, 20.4, 20.2; FT-IR (KBr) 2951, 1732, 1453, 1434, 1320, 1245, 1155, 741, 703  $\text{cm}^{-1}$ ; HRMS (ESI)  $m/z$   $[\text{M}+\text{Na}]^+$  calcd for  $\text{C}_{24}\text{H}_{25}\text{NNaO}_5$ : 430.1625, found: 430.1610.

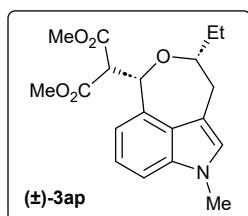

**Dimethyl 2-(3-ethyl-6-methyl-1,3,4,6-tetrahydrooxepino[5,4,3-cd]indol-1-yl)malonate** (±)-**3ap**. Analytical TLC on silica gel, 1:9 ethyl acetate/hexane  $R_f = 0.66$ ; brown sticky liquid; yield 51% (35 mg);  $^1\text{H}$  NMR (400 MHz,  $\text{CDCl}_3$ )  $\delta$  7.19 (d,  $J = 8.4$  Hz, 1H), 7.10 (t,  $J = 7.2$  Hz, 1H), 6.85 (s, 1H), 6.65 (d,  $J = 7.2$  Hz, 1H), 5.61 (d,  $J = 6.8$  Hz, 1H), 4.29 (d,  $J = 6.8$  Hz, 1H), 3.84 (s, 3H), 3.82-3.75 (m, 1H), 3.73 (s, 3H), 3.64 (s, 3H), 3.13-3.08 (m, 1H), 2.98-2.91 (m, 1H), 1.77-1.66 (m, 1H), 1.65-1.58 (m, 1H), 0.97 (t,  $J = 7.2$  Hz, 3H);  $^{13}\text{C}$  NMR (125 MHz,  $\text{CDCl}_3$ )  $\delta$  168.7, 167.6, 137.6, 135.6, 126.2, 125.8, 121.3, 113.9, 113.0, 108.4, 84.7, 80.7, 58.3, 52.9, 52.4, 33.5, 32.8, 29.6, 10.3; FT-IR (KBr) 2950, 2922, 1738, 1455, 1434, 1321, 1155, 1065, 744  $\text{cm}^{-1}$ ; HRMS (ESI)  $m/z$   $[\text{M}+\text{Na}]^+$  calcd for  $\text{C}_{19}\text{H}_{23}\text{NNaO}_5$ : 368.1468, found: 368.1459.

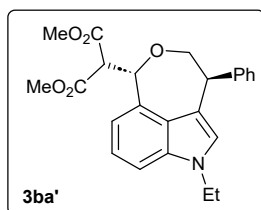

**Dimethyl 2-((1S,4S)-6-ethyl-4-phenyl-1,3,4,6-tetrahydrooxepino[5,4,3-cd]indol-1-yl)malonate** **3ba'**. Analytical TLC on silica gel, 1:9 ethyl acetate/hexane  $R_f = 0.46$ ; yellow sticky liquid; yield 74% (60 mg);  $^1\text{H}$  NMR (400 MHz,  $\text{CDCl}_3$ )  $\delta$  7.34-7.26 (m, 6H), 7.15 (t,  $J = 7.6$  Hz,

1H), 6.75 (d,  $J = 7.2$  Hz, 1H), 6.54-6.53 (m, 1H), 5.61 (d,  $J = 6$  Hz, 1H), 4.52-4.48 (m, 1H), 4.41-4.36 (m, 2H), 4.09-4.03 (m, 2H), 3.89-3.83 (m, 4H), 3.65 (s, 3H), 1.36 (t,  $J = 7.2$  Hz, 3H);  $^{13}\text{C}$  NMR (125 MHz,  $\text{CDCl}_3$ )  $\delta$  168.6, 167.5, 142.2, 136.6, 134.9, 129.0, 128.6, 126.9, 126.8, 125.3, 121.1, 118.5, 114.3, 108.8, 83.0, 79.2, 57.6, 53.0, 52.5, 47.8, 41.0, 15.5; FT-IR (KBr) 2951, 2873, 1736, 1435, 1155, 747, 702  $\text{cm}^{-1}$ ; HRMS (ESI)  $m/z$   $[\text{M}+\text{Na}]^+$  calcd for  $\text{C}_{24}\text{H}_{25}\text{NNaO}_5$ : 430.1625, found: 430.1631;  $[\alpha]_{\text{D}}^{25} = +20$  ( $c = 0.02$ ,  $\text{CHCl}_3$ ); HPLC:  $ee$  for major diastereomer = 98%  $ee$  [CHIRALPAK AD-H, hexane/ $i$ PrOH = 80:20, flow rate: 1 mL/min,  $\lambda = 254$  nm,  $t_R = 6.53$  min (major), 7.68 min (minor)].

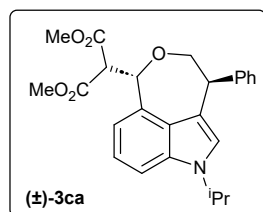

**Dimethyl 2-(6-isopropyl-4-phenyl-1,3,4,6-tetrahydrooxepino[5,4,3-cd]indol-1-yl)malonate** (±)-**3ca**. Analytical TLC on silica gel, 1:9 ethyl acetate/hexane  $R_f = 0.48$ ; yellow sticky liquid; yield 78% (65 mg);  $^1\text{H}$  NMR (400 MHz,  $\text{CDCl}_3$ )  $\delta$  7.34-7.26 (m, 6H), 7.14 (t,  $J = 7.6$  Hz, 1H), 6.75 (d,  $J = 7.6$  Hz, 1H), 6.64-6.63 (m, 1H), 5.60 (d,  $J = 5.6$  Hz, 1H), 4.65-4.58 (m, 1H), 4.53-4.48 (m, 1H), 4.40-4.34 (m, 2H), 3.87-3.81 (m, 4H), 3.66 (s, 3H), 1.44 (d,  $J = 6.8$  Hz, 3H), 1.39 (d,  $J = 6.8$  Hz, 3H);  $^{13}\text{C}$  NMR (125 MHz,  $\text{CDCl}_3$ )  $\delta$  168.6, 167.6, 142.2, 136.5, 134.9, 129.0, 128.6, 126.9, 125.3, 123.4, 120.9, 118.4, 114.4, 108.9, 83.0, 79.4, 57.6, 53.0, 52.5, 47.9, 47.0, 22.86, 22.82; FT-IR (KBr) 2925, 2853, 1737, 1434, 1192, 1129, 746, 701  $\text{cm}^{-1}$ ; HRMS (ESI)  $m/z$   $[\text{M}+\text{Na}]^+$  calcd for  $\text{C}_{25}\text{H}_{27}\text{NNaO}_5$ : 444.1781, found: 444.1782.

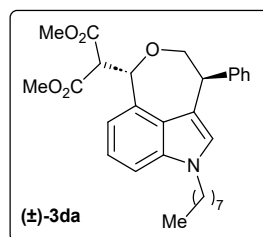

**Dimethyl 2-(6-octyl-4-phenyl-1,3,4,6-tetrahydrooxepino[5,4,3-cd]indol-1-yl)malonate** (±)-**3da**. Analytical TLC on silica gel, 1:9 ethyl acetate/hexane  $R_f = 0.52$ ; yellow sticky liquid; yield

81% (79 mg);  $^1\text{H}$  NMR (400 MHz,  $\text{CDCl}_3$ )  $\delta$  7.33-7.26 (m, 5H), 7.24 (s, 1H), 7.14 (t,  $J = 7.6$  Hz, 1H), 6.74 (d,  $J = 7.6$  Hz, 1H), 6.517-6.513 (m, 1H), 5.60 (d,  $J = 5.6$  Hz, 1H), 4.53-4.48 (m, 1H), 4.40-4.35 (m, 2H), 3.98 (t,  $J = 7.2$  Hz, 2H), 3.88-3.83 (m, 4H), 3.65 (s, 3H), 1.25-1.22 (m, 12H), 0.86 (t,  $J = 6.8$  Hz, 3H);  $^{13}\text{C}$  NMR (125 MHz,  $\text{CDCl}_3$ )  $\delta$  168.6, 167.5, 142.2, 136.8, 134.8, 129.0, 128.5, 127.6, 126.9, 125.2, 121.0, 118.2, 114.3, 108.9, 83.0, 79.3, 57.7, 53.0, 52.5, 47.7, 46.5, 31.8, 30.2, 29.29, 29.27, 27.1, 22.7, 14.2; FT-IR (KBr) 2927, 2855, 1738, 1435, 1258, 1125, 747, 701  $\text{cm}^{-1}$ ; HRMS (ESI)  $m/z$   $[\text{M}+\text{Na}]^+$  calcd for  $\text{C}_{30}\text{H}_{37}\text{NNaO}_5$ : 514.2564, found: 514.2548.

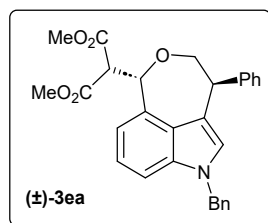

**Dimethyl 2-(6-benzyl-4-phenyl-1,3,4,6-tetrahydrooxepino[5,4,3-cd]indol-1-yl)malonate (±)-3ea.** Analytical TLC on silica gel, 1:9 ethyl acetate/hexane  $R_f = 0.49$ ; brown sticky liquid; yield 68% (63 mg);  $^1\text{H}$  NMR (400 MHz,  $\text{CDCl}_3$ )  $\delta$  7.32-7.26 (m, 6H), 7.24-7.22 (m, 2H), 7.19-7.17 (m, 1H), 7.09 (t,  $J = 7.6$  Hz, 1H), 7.04-7.02 (m, 2H), 6.75 (d,  $J = 7.2$  Hz, 1H), 6.599-6.595 (m, 1H), 5.62 (d,  $J = 5.6$  Hz, 1H), 5.26-5.16 (m, 2H), 4.55-4.51 (m, 1H), 4.41-4.37 (m, 2H), 3.88 (t,  $J = 12$  Hz, 1H), 3.83 (s, 3H), 3.66 (s, 3H);  $^{13}\text{C}$  NMR (125 MHz,  $\text{CDCl}_3$ )  $\delta$  168.6, 167.5, 142.1, 137.5, 137.2, 134.9, 128.9, 128.8, 128.6, 128.1, 127.6, 127.0, 126.6, 125.5, 121.5, 119.1, 114.7, 109.3, 82.9, 79.2, 57.7, 53.0, 52.5, 50.2, 47.7; FT-IR (KBr) 2923, 2852, 1737, 1434, 1160, 735, 700  $\text{cm}^{-1}$ ; HRMS (ESI)  $m/z$   $[\text{M}+\text{H}]^+$  calcd for  $\text{C}_{29}\text{H}_{28}\text{NO}_5$ : 470.1962, found: 470.1948.

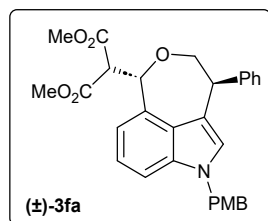

**Dimethyl 2-(6-(4-methoxybenzyl)-4-phenyl-1,3,4,6-tetrahydrooxepino[5,4,3-cd]indol-1-yl)malonate (±)-3fa.** Analytical TLC on silica gel, 1:9 ethyl acetate/hexane  $R_f = 0.46$ ; yellow sticky liquid; yield 58% (57 mg);  $^1\text{H}$  NMR (400 MHz,  $\text{CDCl}_3$ )  $\delta$  7.32-7.26 (m, 5H), 7.20 (d,  $J =$

8.4 Hz, 1H), 7.09 (t,  $J = 7.6$  Hz, 1H), 7.00 (d,  $J = 8.8$  Hz, 2H), 6.80 (d,  $J = 8.8$  Hz, 2H), 6.74 (d,  $J = 7.6$  Hz, 1H), 6.58-6.57 (m, 1H), 5.61 (d,  $J = 6$  Hz, 1H), 5.19-5.09 (m, 2H), 4.54-4.50 (m, 1H), 4.40-4.36 (m, 2H), 3.90-3.86 (m, 1H), 3.83 (s, 3H), 3.75 (s, 3H), 3.66 (s, 3H);  $^{13}\text{C}$  NMR (125 MHz,  $\text{CDCl}_3$ )  $\delta$  168.6, 167.5, 159.1, 142.1, 137.1, 134.9, 129.5, 128.9, 128.6, 128.09, 128.04, 127.0, 125.5, 121.4, 118.9, 114.6, 114.2, 109.3, 82.9, 79.2, 57.7, 55.4, 53.0, 52.5, 49.7, 47.7; FT-IR (KBr) 2926, 1736, 1513, 1434, 1248, 1175, 1031, 702  $\text{cm}^{-1}$ ; HRMS (ESI)  $m/z$   $[\text{M}+\text{Na}]^+$  calcd for  $\text{C}_{30}\text{H}_{29}\text{NNaO}_6$ : 522.1887, found: 522.1889.

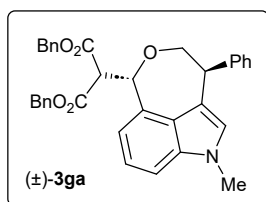

**Dibenzyl 2-((6-methyl-4-phenyl-1,3,4,6-tetrahydrooxepino[5,4,3-cd]indol-1-yl)malonate (±)-**3ga**.** Analytical TLC on silica gel, 1:9 ethyl acetate/hexane  $R_f = 0.61$ ; yellow sticky liquid; yield 68% (74 mg);  $^1\text{H}$  NMR (400 MHz,  $\text{CDCl}_3$ )  $\delta$  7.38-7.32 (m, 7H), 7.30-7.29 (m, 1H), 7.27-7.26 (m, 2H), 7.25-7.19 (m, 4H), 7.13-7.12 (m, 1H), 7.10-7.08 (m, 2H), 6.77 (d,  $J = 5.2$  Hz, 1H), 6.477-6.474 (m, 1H), 5.68 (d,  $J = 3.6$  Hz, 1H), 5.36-5.34 (m, 1H), 5.24-5.22 (m, 1H), 5.12-5.10 (m, 1H), 5.07-5.04 (m, 1H), 4.50 (d,  $J = 3.6$  Hz, 1H), 4.48-4.45 (m, 1H), 4.26 (dd,  $J = 8, 3.2$  Hz, 1H), 3.84 (t,  $J = 7.6$  Hz, 1H), 3.70 (s, 3H);  $^{13}\text{C}$  NMR (150 MHz,  $\text{CDCl}_3$ )  $\delta$  167.9, 166.8, 142.3, 137.6, 135.7, 135.6, 134.9, 128.9, 128.68, 128.60, 128.47, 128.44, 128.42, 128.3, 128.1, 127.9, 126.9, 125.2, 121.3, 118.6, 114.7, 108.6, 82.6, 78.6, 67.5, 66.9, 58.1, 47.7, 32.9; FT-IR (KBr) 2925, 1733, 1454, 1122, 739, 698  $\text{cm}^{-1}$ ; HRMS (ESI)  $m/z$   $[\text{M}+\text{Na}]^+$  calcd for  $\text{C}_{35}\text{H}_{31}\text{NNaO}_5$ : 568.2094, found: 568.2107.

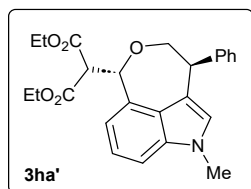

**Diethyl 2-((1S,4S)-6-methyl-4-phenyl-1,3,4,6-tetrahydrooxepino[5,4,3-cd]indol-1-yl)malonate **3ha'**.** Analytical TLC on silica gel, 1:9 ethyl acetate/hexane  $R_f = 0.58$ ; yellow sticky

liquid; yield 63% (53 mg);  $^1\text{H}$  NMR (500 MHz,  $\text{CDCl}_3$ )  $\delta$  7.33-7.27 (m, 5H), 7.23 (d,  $J = 8.0$  Hz, 1H), 7.16 (t,  $J = 7.5$  Hz, 1H), 6.78 (d,  $J = 7.5$  Hz, 1H), 6.46 (s, 1H), 5.61 (d,  $J = 5.5$  Hz, 1H), 4.53-4.49 (m, 1H), 4.39-4.32 (m, 3H), 4.28-4.22 (m, 1H), 4.19-4.12 (m, 1H), 4.11-4.05 (m, 1H), 3.87 (t,  $J = 11.5$  Hz, 1H), 3.67 (s, 3H), 1.30 (t,  $J = 7.0$  Hz, 3H), 1.08 (t,  $J = 7.0$  Hz, 3H);  $^{13}\text{C}$  NMR (125 MHz,  $\text{CDCl}_3$ )  $\delta$  168.2, 167.0, 142.3, 137.6, 135.2, 129.0, 128.6, 128.5, 126.9, 125.2, 121.2, 118.6, 114.5, 108.6, 82.9, 79.0, 61.8, 61.2, 58.0, 47.7, 32.9, 14.2, 14.1; FT-IR (KBr) 2925, 1732, 1454, 1300, 1155, 1123, 1095, 743, 702  $\text{cm}^{-1}$ ; HRMS (ESI)  $m/z$   $[\text{M}+\text{Na}]^+$  calcd for  $\text{C}_{25}\text{H}_{27}\text{NNaO}_5$ : 444.1781, found: 444.1781;  $[\alpha]_{\text{D}}^{25} = -20$  ( $c = 0.01$ ,  $\text{CHCl}_3$ ); HPLC:  $ee$  for major diastereomer = 97%  $ee$  [CHIRALPAK AD-H, hexane/ $i$ PrOH = 80:20, flow rate: 1 mL/min,  $\lambda = 254$  nm,  $t_R = 7.78$  min (major), 8.82 min (minor)].

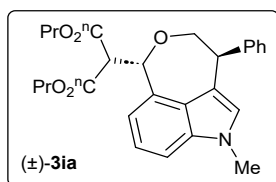

**Dipropyl 2-(6-methyl-4-phenyl-1,3,4,6-tetrahydrooxepino[5,4,3-cd]indol-1-yl)malonate (±)-3ia.** Analytical TLC on silica gel, 1:9 ethyl acetate/hexane  $R_f = 0.60$ ; yellow sticky liquid; yield 61% (54 mg);  $^1\text{H}$  NMR (400 MHz,  $\text{CDCl}_3$ )  $\delta$  7.34-7.26 (m, 5H), 7.23-7.21 (m, 1H), 7.15 (t,  $J = 7.2$  Hz, 1H), 6.79 (d,  $J = 7.2$  Hz, 1H), 6.46-6.45 (m, 1H), 5.62 (d,  $J = 5.6$  Hz, 1H), 4.52-4.48 (m, 1H), 4.37-4.34 (m, 2H), 4.28-4.22 (m, 1H), 4.19-4.13 (m, 1H), 4.07-3.96 (m, 2H), 3.87 (t,  $J = 11.6$  Hz, 1H), 3.67 (s, 3H), 1.74-1.65 (m, 2H), 1.52-1.45 (m, 2H), 0.95 (t,  $J = 7.2$  Hz, 3H), 0.76 (t,  $J = 7.6$  Hz, 3H);  $^{13}\text{C}$  NMR (125 MHz,  $\text{CDCl}_3$ )  $\delta$  168.3, 167.1, 142.3, 137.6, 135.2, 129.0, 128.6, 128.4, 126.9, 125.2, 121.2, 118.6, 114.5, 108.5, 82.8, 79.0, 67.4, 66.8, 58.1, 47.7, 32.9, 22.0, 21.9, 10.4, 10.3; FT-IR (KBr) 2929, 2878, 1733, 1455, 1299, 1123, 744, 701  $\text{cm}^{-1}$ ; HRMS (ESI)  $m/z$   $[\text{M}+\text{Na}]^+$  calcd for  $\text{C}_{27}\text{H}_{31}\text{NNaO}_5$ : 472.2094, found: 472.2092.

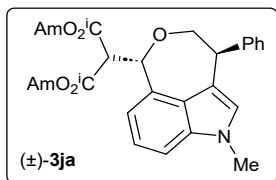

**Diisopentyl 2-(6-methyl-4-phenyl-1,3,4,6-tetrahydrooxepino[5,4,3-cd]indol-1-yl)malonate** ( $\pm$ )-**3ja**. Analytical TLC on silica gel, 1:9 ethyl acetate/hexane  $R_f$  = 0.64; yellow sticky liquid; yield 49% (40 mg);  $^1\text{H}$  NMR (400 MHz,  $\text{CDCl}_3$ )  $\delta$  7.34-7.27 (m, 5H), 7.22 (d,  $J$  = 8 Hz, 1H), 7.15 (t,  $J$  = 7.2 Hz, 1H), 6.79-6.77 (m, 1H), 6.45 (s, 1H), 5.61-5.60 (m, 1H), 4.51-4.47 (m, 1H), 4.38-4.19 (m, 4H), 4.11-4.00 (m, 2H), 3.86 (t,  $J$  = 11.6 Hz, 1H), 3.67 (s, 3H), 1.77-1.65 (m, 1H), 1.42-1.28 (m, 5H), 0.92-0.90 (m, 6H), 0.76-0.74 (m, 3H), 0.70-0.68 (m, 3H);  $^{13}\text{C}$  NMR (100 MHz,  $\text{CDCl}_3$ )  $\delta$  168.3, 167.2, 142.3, 137.6, 135.1, 128.9, 128.6, 128.4, 126.9, 125.1, 121.2, 118.6, 114.5, 108.5, 82.7, 78.8, 64.5, 63.7, 58.1, 47.7, 37.2, 37.1, 32.9, 25.0, 24.5, 22.6, 22.5, 22.4, 22.2; FT-IR (KBr) 2956, 2925, 2868, 1734, 1454, 1156, 1121, 746, 701  $\text{cm}^{-1}$ ; HRMS (ESI)  $m/z$   $[\text{M}+\text{H}]^+$  calcd for  $\text{C}_{31}\text{H}_{40}\text{NO}_5$ : 506.2901, found: 506.2908.

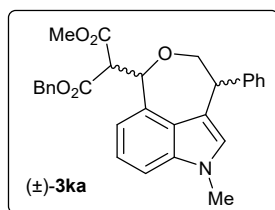

**1-Benzyl 3-methyl 2-(6-methyl-4-phenyl-1,3,4,6-tetrahydrooxepino[5,4,3-cd]indol-1-yl)malonate** ( $\pm$ )-**3ka**. Analytical TLC on silica gel, 1:9 ethyl acetate/hexane  $R_f$  = 0.55; brown sticky liquid; yield 56% (52 mg); mixture of diastereomers (dr = 3:2);  $^1\text{H}$  NMR (400 MHz,  $\text{CDCl}_3$ )  $\delta$  7.41-7.27 (m, 10.34H), 7.24-7.17 (m, 6.86H), 7.15-7.11 (m, 1.76H), 7.08-7.06 (m, 1.69H), 6.78 (d,  $J$  = 7.6 Hz, 0.72H), 6.72 (d,  $J$  = 7.2 Hz, 0.70H), 6.46 (s, 1.38H), 5.64 (dd,  $J$  = 10.8, 5.2 Hz, 1.63H), 5.35-5.32 (m, 0.72H), 5.24-5.20 (m, 0.70H), 5.12-5.03 (m, 2H), 4.51-4.41 (m, 3.39H), 4.33-4.28 (m, 1.70H), 3.88-3.82 (m, 1.71H), 3.81 (s, 3H), 3.68 (s, 2.12H), 3.67 (s, 2.13H), 3.64 (s, 3H);  $^{13}\text{C}$  NMR (100 MHz,  $\text{CDCl}_3$ )  $\delta$  168.5, 167.9, 167.4, 166.9, 142.2, 142.1, 137.59, 137.54, 135.6, 135.4, 134.8, 128.97, 128.95, 128.68, 128.60, 128.5, 128.4, 128.3, 128.1, 127.9, 126.99, 126.97, 125.1, 125.0, 121.3, 121.2, 118.5, 118.4, 114.56, 114.50, 108.69, 108.65, 82.8, 82.7, 79.0, 78.8, 67.5, 66.9, 57.89, 57.83, 52.9, 52.5, 47.68, 47.64, 32.9, 29.8; FT-IR (KBr) 2923, 2853, 1734, 1454, 1300, 1153, 742, 700  $\text{cm}^{-1}$ ; HRMS (ESI)  $m/z$   $[\text{M}+\text{Na}]^+$  calcd for  $\text{C}_{29}\text{H}_{27}\text{NNaO}_5$ : 492.1781, found: 492.1765.

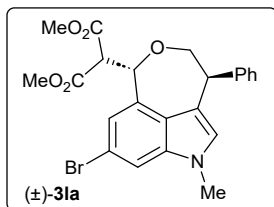

**Dimethyl 2-(8-bromo-6-methyl-4-phenyl-1,3,4,6-tetrahydrooxepino[5,4,3-cd]indol-1-yl)malonate (±)-3la.** Analytical TLC on silica gel, 1:9 ethyl acetate/hexane  $R_f$  = 0.48; brown sticky liquid; yield 66% (62 mg);  $^1\text{H}$  NMR (400 MHz,  $\text{CDCl}_3$ )  $\delta$  7.38 (s, 1H), 7.34-7.26 (m, 3H), 7.25-7.23 (m, 2H), 6.87-6.86 (m, 1H), 6.448-6.444 (m, 1H), 5.57 (d,  $J$  = 5.6 Hz, 1H), 4.50-4.45 (m, 1H), 4.38-4.32 (m, 2H), 3.87-3.84 (m, 4H), 3.67 (s, 3H), 3.64 (s, 3H);  $^{13}\text{C}$  NMR (125 MHz,  $\text{CDCl}_3$ )  $\delta$  168.3, 167.1, 141.7, 138.3, 136.4, 129.1, 128.8, 128.6, 127.1, 124.1, 118.9, 117.8, 114.6, 111.7, 82.2, 78.8, 57.4, 53.1, 52.6, 47.4, 33.0; FT-IR (KBr) 2950, 2865, 1733, 1454, 1434, 1243, 1128, 701  $\text{cm}^{-1}$ ; HRMS (ESI)  $m/z$   $[\text{M}+\text{Na}]^+$  calcd for  $\text{C}_{23}\text{H}_{22}\text{BrNNaO}_5$ : 494.0574, found: 494.0557.

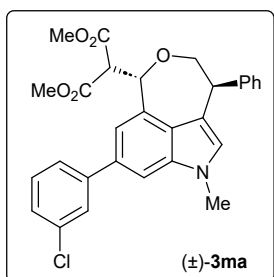

**Dimethyl 2-(8-(3-chlorophenyl)-6-methyl-4-phenyl-1,3,4,6-tetrahydrooxepino[5,4,3-cd]indol-1-yl)malonate (±)-3ma.** Analytical TLC on silica gel, 1:9 ethyl acetate/hexane  $R_f$  = 0.51; yellow sticky liquid; yield 63% (63 mg);  $^1\text{H}$  NMR (500 MHz,  $\text{CDCl}_3$ )  $\delta$  7.59 (s, 1H), 7.49-7.48 (m, 1H), 7.39-7.29 (m, 9H), 6.98 (s, 1H), 6.52 (s, 1H), 5.67-5.65 (m, 1H), 4.53-4.51 (m, 1H), 4.47-4.46 (m, 1H), 4.42-4.40 (m, 1H), 3.89 (t,  $J$  = 12 Hz, 1H), 3.84 (s, 3H), 3.73 (s, 3H), 3.67 (s, 3H);  $^{13}\text{C}$  NMR (125 MHz,  $\text{CDCl}_3$ )  $\delta$  168.5, 167.5, 144.1, 141.9, 138.0, 135.3, 134.7, 133.3, 130.1, 129.5, 128.9, 128.6, 127.4, 127.1, 126.8, 125.5, 124.9, 118.6, 114.2, 107.3, 82.9, 79.1, 57.6, 53.0, 52.6, 47.5, 33.0; FT-IR (KBr) 2950, 1733, 1593, 1456, 1245, 1128, 786, 700  $\text{cm}^{-1}$ ; HRMS (ESI)  $m/z$   $[\text{M}+\text{Na}]^+$  calcd for  $\text{C}_{29}\text{H}_{26}\text{ClNNaO}_5$ : 526.1392, found: 526.1368.

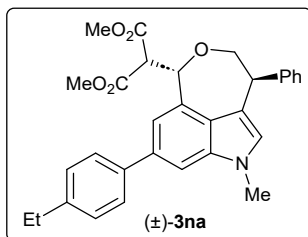

**Dimethyl 2-(8-(4-ethylphenyl)-6-methyl-4-phenyl-1,3,4,6-tetrahydrooxepino[5,4,3-cd]indol-1-yl)malonate (±)-3na.** Analytical TLC on silica gel, 1:9 ethyl acetate/hexane  $R_f$  = 0.53; yellow sticky liquid; yield 71% (70 mg);  $^1\text{H}$  NMR (400 MHz,  $\text{CDCl}_3$ )  $\delta$  7.55 (d,  $J$  = 8.4 Hz, 2H), 7.40 (s, 1H), 7.35-7.27 (m, 7H), 7.02 (s, 1H), 6.499-6.495 (m, 1H), 5.67 (d,  $J$  = 5.6 Hz, 1H), 4.55-4.51 (m, 1H), 4.48 (d,  $J$  = 5.6 Hz, 1H), 4.42 (dd,  $J$  = 11.6, 4.8 Hz, 1H), 3.90 (t,  $J$  = 11.6 Hz, 1H), 3.84 (s, 3H), 3.71 (s, 3H), 3.66 (s, 3H), 2.74 (q,  $J$  = 7.6 Hz, 2H), 1.30 (t,  $J$  = 7.6 Hz, 3H);  $^{13}\text{C}$  NMR (125 MHz,  $\text{CDCl}_3$ )  $\delta$  168.5, 167.5, 143.0, 142.1, 139.6, 138.1, 135.0, 134.9, 129.0, 128.9, 128.6, 128.4, 127.3, 127.0, 124.3, 118.5, 114.4, 107.1, 83.0, 79.1, 57.7, 53.0, 52.5, 47.6, 32.9, 28.6, 15.7; FT-IR (KBr) 2928, 2870, 1735, 1455, 1245, 1127, 828, 702  $\text{cm}^{-1}$ ; HRMS (ESI)  $m/z$   $[\text{M}+\text{Na}]^+$  calcd for  $\text{C}_{31}\text{H}_{31}\text{NNaO}_5$ : 520.2094, found: 520.2088.

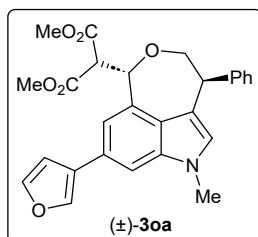

**Dimethyl 2-(8-(furan-3-yl)-6-methyl-4-phenyl-1,3,4,6-tetrahydrooxepino[5,4,3-cd]indol-1-yl)malonate (±)-3oa.** Analytical TLC on silica gel, 1:9 ethyl acetate/hexane  $R_f$  = 0.43; yellow sticky liquid; yield 55% (50 mg);  $^1\text{H}$  NMR (400 MHz,  $\text{CDCl}_3$ )  $\delta$  7.71-7.70 (m, 1H), 7.49-7.48 (m, 1H), 7.33-7.28 (m, 6H), 6.92-6.91 (m, 1H), 6.72-6.71 (m, 1H), 6.47-6.46 (m, 1H), 5.62 (d,  $J$  = 5.5 Hz, 1H), 4.52-4.48 (m, 1H), 4.44-4.42 (m, 1H), 4.40-4.37 (m, 1H), 3.88 (t,  $J$  = 11.5 Hz, 1H), 3.83 (s, 3H), 3.70 (s, 3H), 3.65 (s, 3H);  $^{13}\text{C}$  NMR (125 MHz,  $\text{CDCl}_3$ )  $\delta$  168.5, 167.5, 143.7, 142.0, 138.1, 138.0, 135.2, 128.9, 128.6, 127.4, 127.0, 125.8, 124.4, 118.7, 113.3, 109.3, 105.9, 82.8, 79.1, 57.7, 53.0, 52.6, 47.5, 33.0; FT-IR (KBr) 2923, 2854, 1737, 1452, 1435, 1159, 1131, 1021, 872, 702  $\text{cm}^{-1}$ ; HRMS (ESI)  $m/z$   $[\text{M}+\text{H}]^+$  calcd for  $\text{C}_{27}\text{H}_{25}\text{NNaO}_6$ : 482.1574, found: 482.1580.

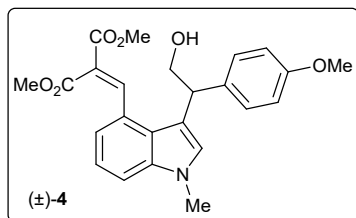

**Dimethyl 2-((3-(2-hydroxy-1-(4-methoxyphenyl)ethyl)-1-methyl-1H-indol-4-yl)methylene)malonate (±)-4.** Analytical TLC on silica gel, 1:2 ethyl acetate/hexane  $R_f$  = 0.30; brown sticky liquid; yield 85% (72 mg);  $^1\text{H}$  NMR (400 MHz,  $\text{CDCl}_3$ )  $\delta$  8.19 (s, 1H), 7.34 (d,  $J$  = 8.4 Hz, 1H), 7.22-7.18 (m, 3H), 7.14 (t,  $J$  = 7.6 Hz, 1H), 7.03 (d,  $J$  = 7.2 Hz, 1H), 6.85-6.83 (m, 2H), 4.53 (t,  $J$  = 6.4 Hz, 1H), 4.13-4.04 (m, 2H), 3.86 (s, 3H), 3.82 (s, 3H), 3.76 (s, 3H), 3.64 (s, 3H);  $^{13}\text{C}$  NMR (125 MHz,  $\text{CDCl}_3$ )  $\delta$  167.2, 164.5, 158.7, 144.0, 137.6, 133.6, 129.8, 128.3, 126.8, 126.3, 125.9, 121.7, 119.8, 115.1, 114.1, 111.5, 67.6, 55.3, 52.5, 52.4, 45.8, 33.1; FT-IR (KBr) 3395, 2930, 2851, 1736, 1609, 1509, 1455, 1301, 1248, 748  $\text{cm}^{-1}$ ; HRMS (ESI)  $m/z$   $[\text{M}+\text{H}]^+$  calcd for  $\text{C}_{24}\text{H}_{26}\text{NO}_6$ : 424.1755, found: 424.1766.

## HPLC chromatograms

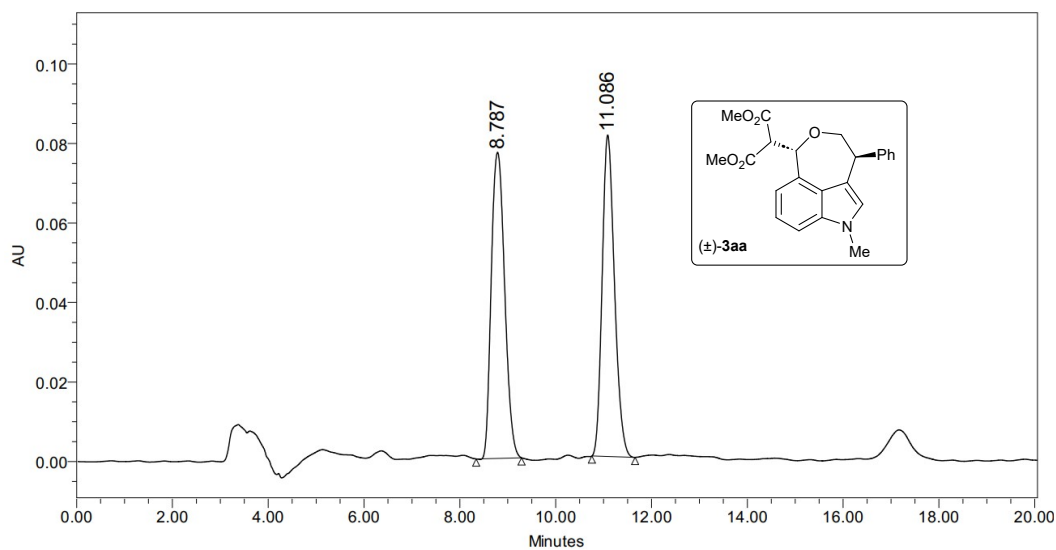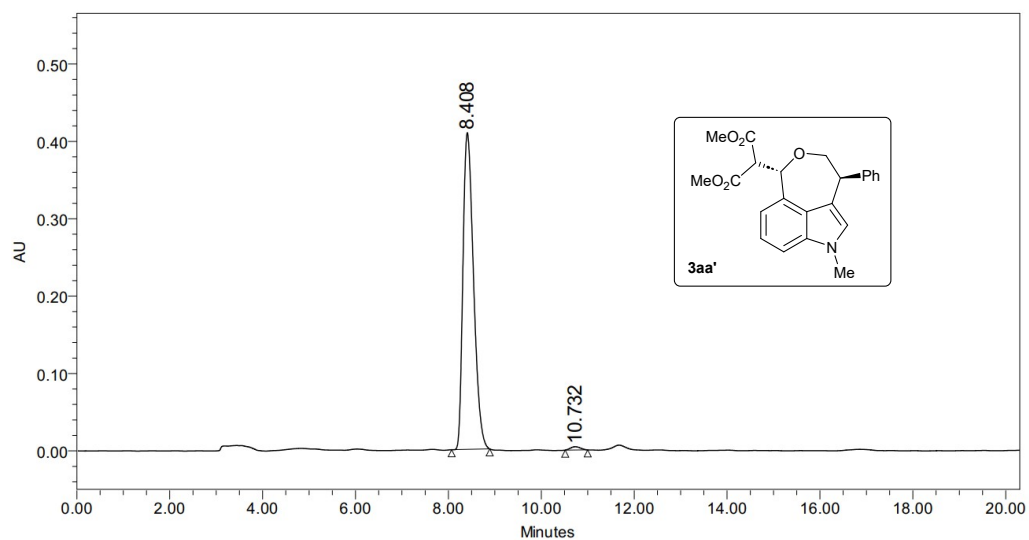

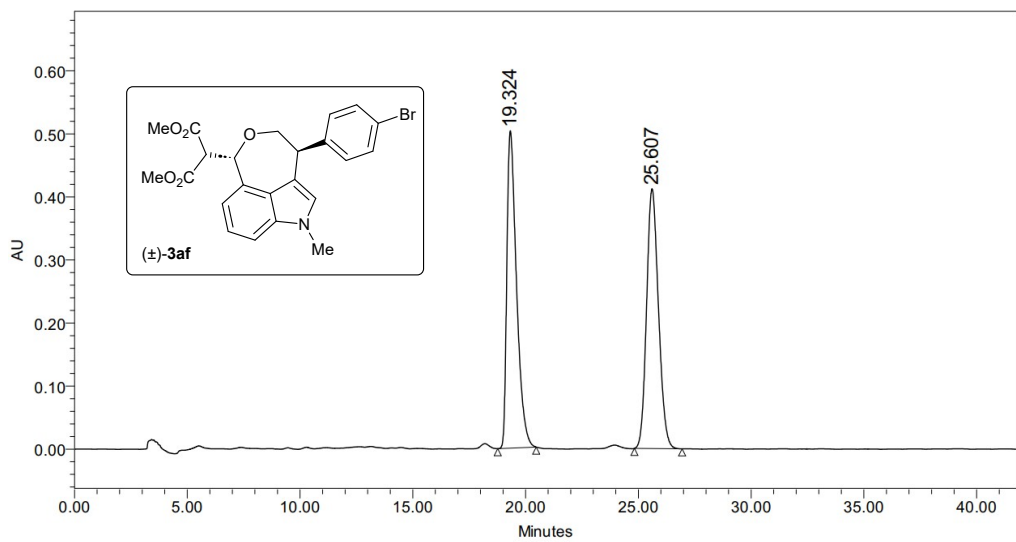

|   | RT     | Area     | % Area | Height |
|---|--------|----------|--------|--------|
| 1 | 19.324 | 14967888 | 49.86  | 503346 |
| 2 | 25.607 | 15053667 | 50.14  | 412014 |

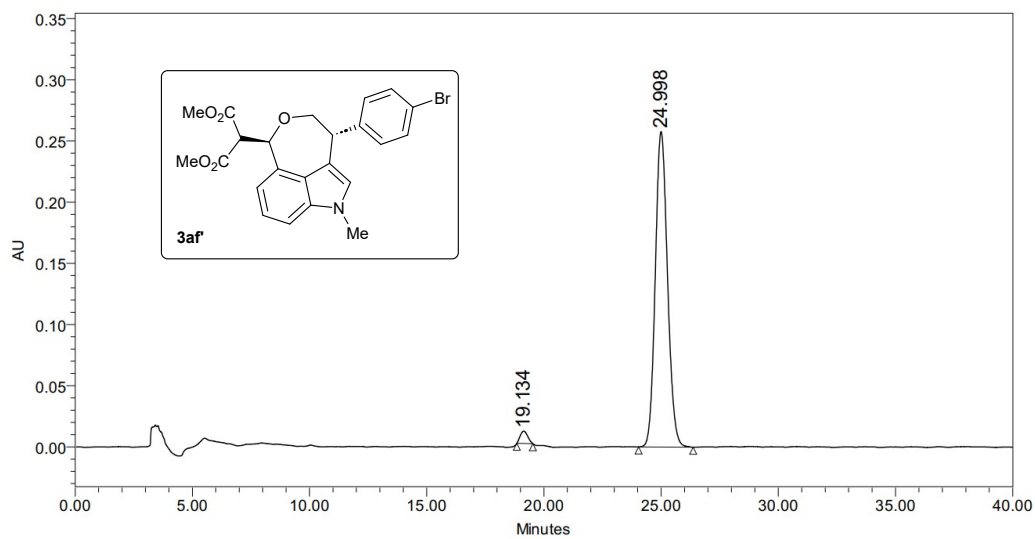

|   | RT     | Area    | % Area | Height |
|---|--------|---------|--------|--------|
| 1 | 19.134 | 224855  | 2.35   | 10130  |
| 2 | 24.998 | 9332722 | 97.65  | 257824 |

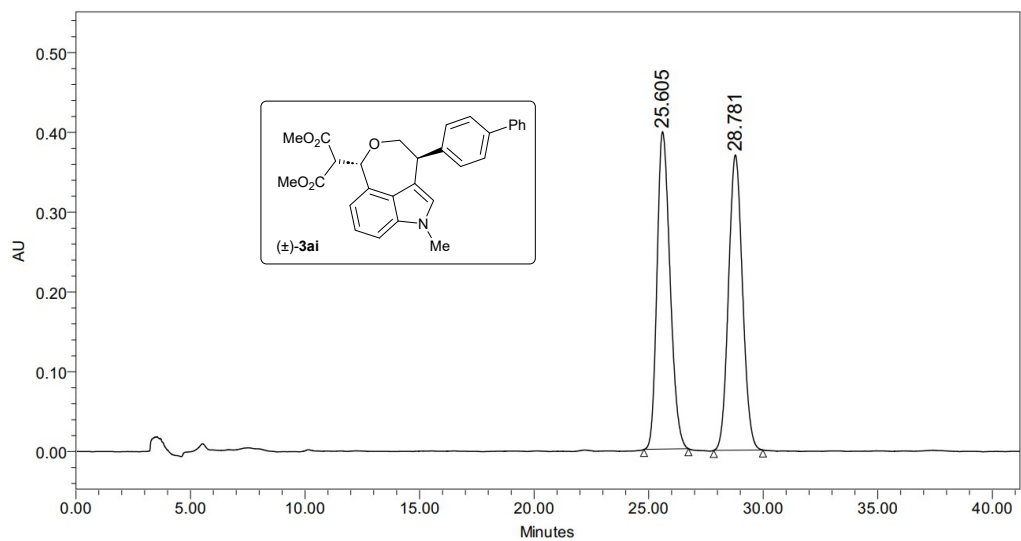

|   | RT     | Area     | % Area | Height |
|---|--------|----------|--------|--------|
| 1 | 25.605 | 15703819 | 50.03  | 397811 |
| 2 | 28.781 | 15686928 | 49.97  | 370144 |

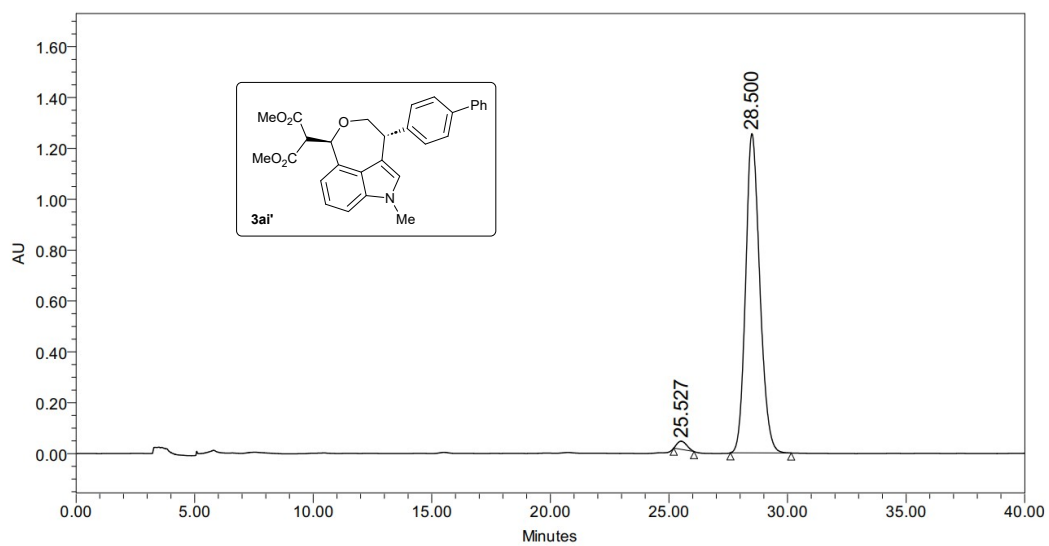

|   | RT     | Area     | % Area | Height  |
|---|--------|----------|--------|---------|
| 1 | 25.527 | 894491   | 1.68   | 31971   |
| 2 | 28.500 | 52196242 | 98.32  | 1255623 |

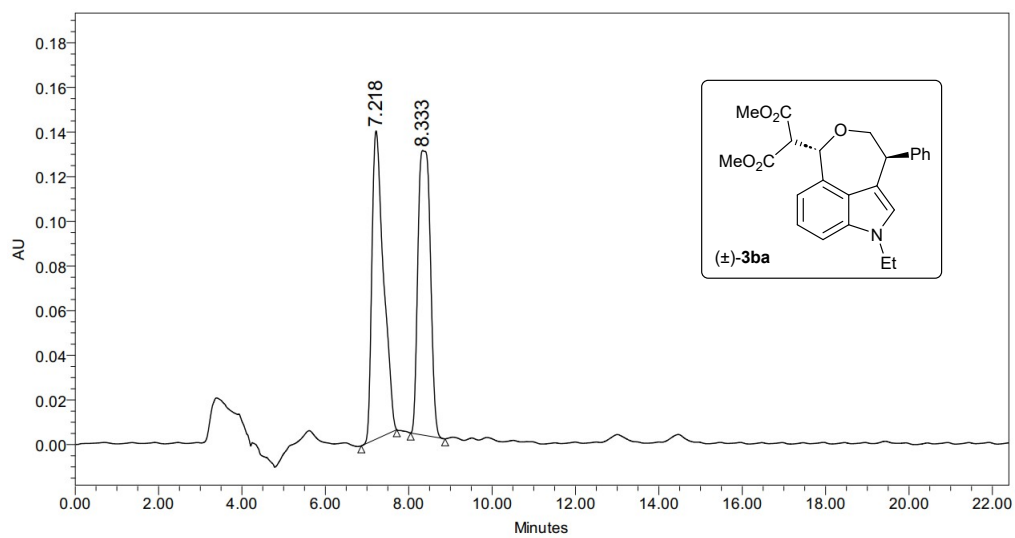

|   | RT    | Area    | % Area | Height |
|---|-------|---------|--------|--------|
| 1 | 7.218 | 2663726 | 50.06  | 138058 |
| 2 | 8.333 | 2657424 | 49.94  | 127486 |

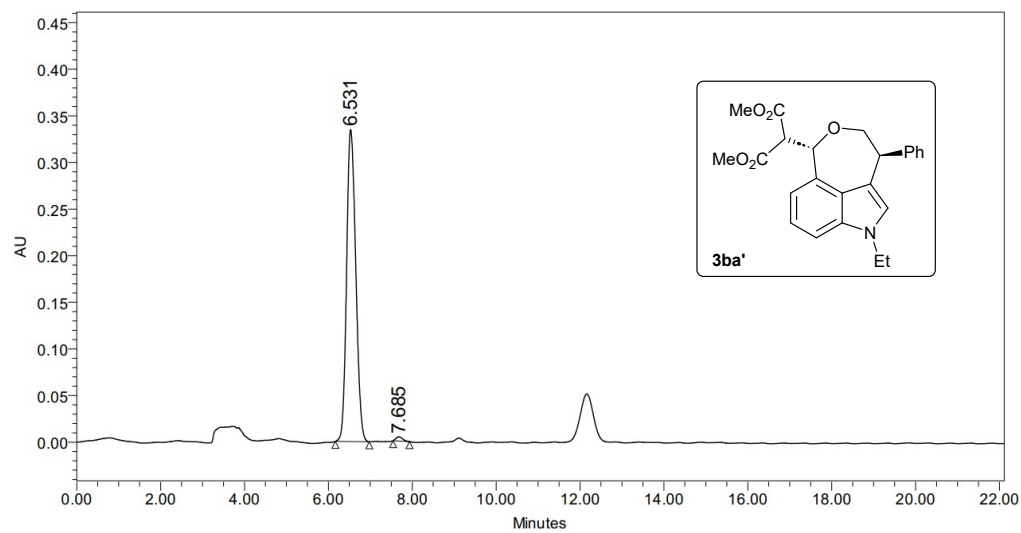

|   | RT    | Area    | % Area | Height |
|---|-------|---------|--------|--------|
| 1 | 6.531 | 5063370 | 99.04  | 334813 |
| 2 | 7.685 | 49120   | 0.96   | 4501   |

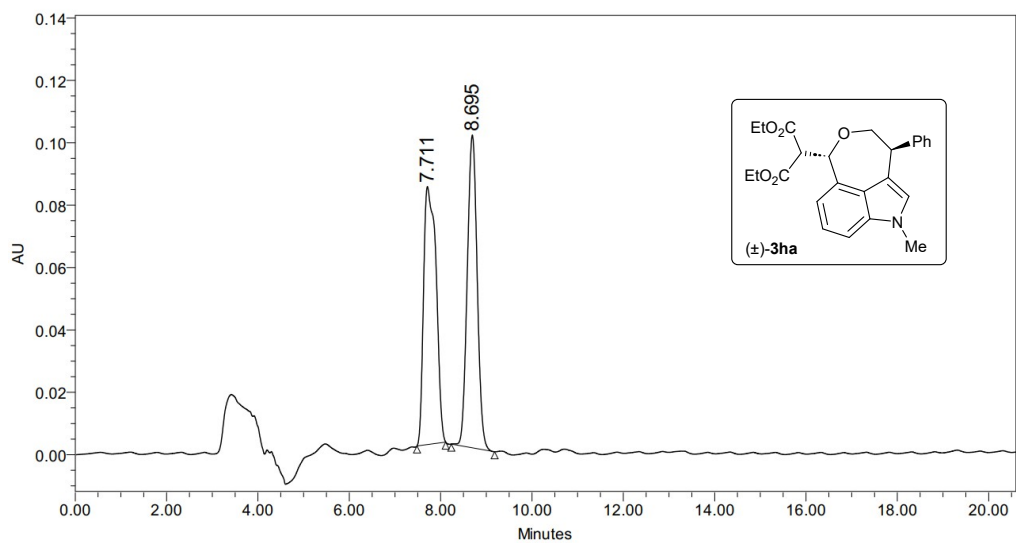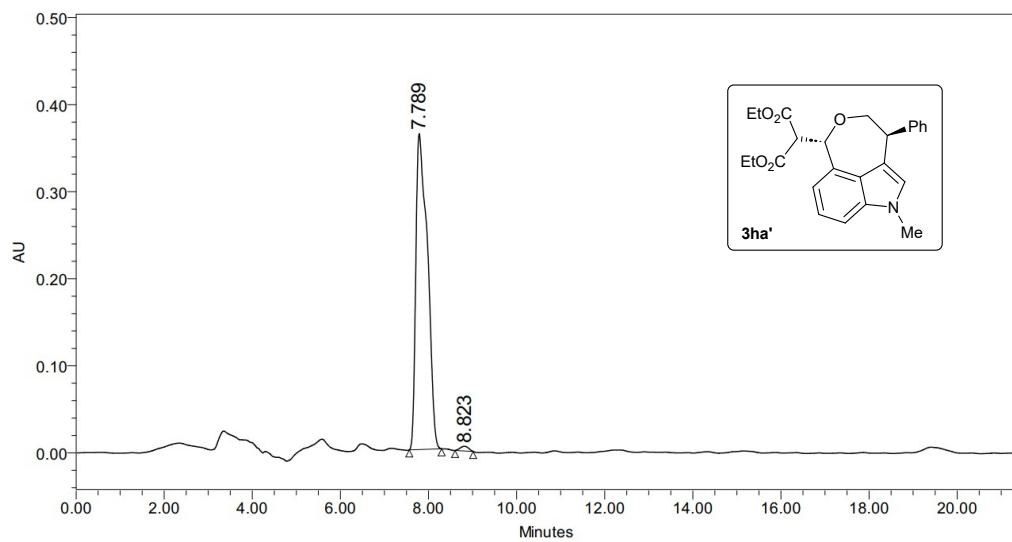

**Procedure for Scale-up Synthesis of (±)-3af.** Indolyl malonate **1a** (2 mmol, 1 equiv, 546 mg), oxirane **2f** (2.4 mmol, 1.2 equiv, 475 mg), Co(OAc)<sub>2</sub>·4H<sub>2</sub>O (0.2 mmol, 0.10 equiv, 36 mg) and 4 Å molecular sieves (1 g) were stirred in CH<sub>2</sub>Cl<sub>2</sub> (5 mL) at 50 °C for 4 h in a pre-heated oil bath under calcium chloride tube. Then, KO<sup>t</sup>Bu (2 mmol, 1 equiv, 224 mg) was added and the resulting mixture was stirred at the same temperature for an additional 5 h. After completion, as monitored by TLC, the reaction mixture was allowed to cool to room temperature and diluted with CH<sub>2</sub>Cl<sub>2</sub> (10 mL) and passed through a short pad of celite using CH<sub>2</sub>Cl<sub>2</sub> (20 mL). Drying (Na<sub>2</sub>SO<sub>4</sub>) and evaporation of the solvent gave a residue that was purified on silica gel column chromatography using ethyl acetate and hexane as an eluent to afford (±)-**3af**.

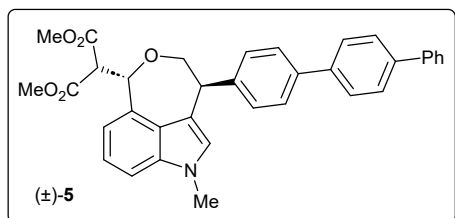

**Dimethyl 2-(4-([1,1':4',1''-terphenyl]-4-yl)-6-methyl-1,3,4,6-tetrahydrooxepino[5,4,3-cd]indol-1-yl)malonate (±)-5.**<sup>3</sup> To a solution of (±)-**3af** (0.1 mmol, 1 equiv, 47 mg) in toluene/EtOH (1:1, 3 mL), was added [1,1'-biphenyl]-4-ylboronic acid (0.1 mmol, 1 equiv, 19 mg), Pd(PPh<sub>3</sub>)<sub>4</sub> (0.03 mmol, 0.03 equiv, 3 mg), Na<sub>2</sub>CO<sub>3</sub> (0.1 mmol, 1 equiv, 11 mg) and H<sub>2</sub>O (100 µL). The mixture was stirred at 100 °C for 12 h in a pre-heated oil bath under a nitrogen atmosphere. After 12 h, the reaction mixture was cooled to room temperature and diluted with ethyl acetate (10 mL) and washed with brine (1 x 10 mL). Drying (Na<sub>2</sub>SO<sub>4</sub>) and evaporation of the solvent gave a residue that was purified by silica gel column chromatography using hexane and ethyl acetate as eluent to give (±)-**5**. Analytical TLC on silica gel, 1:9 ethyl acetate/hexane R<sub>f</sub> = 0.45; brown sticky liquid; yield 85% (46 mg); <sup>1</sup>H NMR (400 MHz, CDCl<sub>3</sub>) δ 7.68 (s, 4H), 7.66 (d, *J* = 6.8 Hz, 2H), 7.61 (d, *J* = 8 Hz, 2H), 7.46 (t, *J* = 7.2 Hz, 2H), 7.38-7.36 (m, 3H), 7.26-7.24 (m, 1H), 7.19 (t, *J* = 7.6 Hz, 1H), 6.79 (d, *J* = 7.2 Hz, 1H), 6.567-6.564 (m, 1H), 5.65 (d, *J* = 6 Hz, 1H), 4.59-4.55 (m, 1H), 4.46-4.42 (m, 2H), 3.92 (t, *J* = 11.6 Hz, 1H), 3.84 (s, 3H), 3.70 (s, 3H), 3.66 (s, 3H); <sup>13</sup>C NMR (125 MHz, CDCl<sub>3</sub>) δ 168.6, 167.5, 141.3, 140.8, 140.1, 139.8, 139.3, 137.6, 134.8, 129.4, 128.9, 128.6, 127.6, 127.4, 127.2, 127.1, 125.1, 121.3, 118.4, 114.5, 108.7, 82.9, 79.0, 57.7, 53.0, 52.5,

47.3, 32.9; FT-IR (KBr) 3028, 2949, 2867, 1734, 1483, 1243, 1155, 1126, 826, 765, 740  $\text{cm}^{-1}$ ; HRMS (ESI)  $m/z$   $[M+Na]^+$  calcd for  $\text{C}_{35}\text{H}_{31}\text{NNaO}_5$ : 568.2094, found: 568.2082.

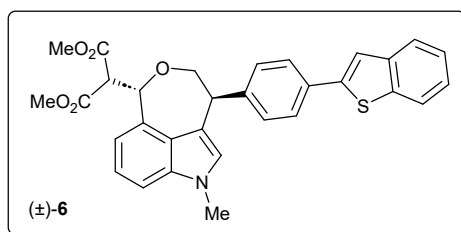

**Dimethyl 2-(4-(4-(benzo[b]thiophen-2-yl)phenyl)-6-methyl-1,3,4,6-tetrahydrooxepino[5,4,3-cd]indol-1-yl)malonate (±)-6.**<sup>3</sup> To a solution of (±)-3af (0.1 mmol, 1 equiv, 47 mg) in toluene/EtOH (1:1, 3 mL), was added the benzo[b]thiophen-2-ylboronic acid (0.1 mmol, 1 equiv, 17 mg),  $\text{Pd}(\text{PPh}_3)_4$  (0.03 mmol, 0.03 equiv, 3 mg),  $\text{Na}_2\text{CO}_3$  (0.1 mmol, 1 equiv, 11 mg) and  $\text{H}_2\text{O}$  (100  $\mu\text{L}$ ). The mixture was stirred at 100  $^\circ\text{C}$  for 12 h in a pre-heated oil bath under a nitrogen atmosphere. After 12 h, the reaction mixture was cooled to room temperature and diluted with ethyl acetate (10 mL) and washed with brine (1 x 10 mL). Drying ( $\text{Na}_2\text{SO}_4$ ) and evaporation of the solvent gave a residue that was purified by silica gel column chromatography using hexane and ethyl acetate as eluent to give (±)-6. Analytical TLC on silica gel, 1:9 ethyl acetate/hexane  $R_f$  = 0.38; brown sticky liquid; yield 62% (32 mg);  $^1\text{H}$  NMR (400 MHz,  $\text{CDCl}_3$ )  $\delta$  7.84-7.82 (m, 1H), 7.78-7.76 (m, 1H), 7.68 (d,  $J$  = 8 Hz, 2H), 7.54 (s, 1H), 7.36-7.30 (m, 5H), 7.18 (t,  $J$  = 7.6 Hz, 1H), 6.79 (d,  $J$  = 7.2 Hz, 1H), 6.54-6.53 (m, 1H), 5.64 (d,  $J$  = 5.6 Hz, 1H), 4.57-4.53 (m, 1H), 4.43-4.39 (m, 2H), 3.93-3.86 (m, 1H), 3.84 (s, 3H), 3.70 (s, 3H), 3.65 (s, 3H);  $^{13}\text{C}$  NMR (125 MHz,  $\text{CDCl}_3$ )  $\delta$  168.6, 167.5, 144.1, 142.4, 140.8, 139.5, 137.6, 134.8, 133.1, 129.5, 128.5, 126.7, 125.1, 124.6, 124.4, 123.6, 122.4, 121.4, 119.3, 118.1, 114.5, 108.8, 82.9, 78.8, 57.6, 53.0, 52.6, 47.4, 32.9; FT-IR (KBr) 2925, 2855, 1737, 1455, 1434, 1245, 1156, 746  $\text{cm}^{-1}$ ; HRMS (ESI)  $m/z$   $[M+Na]^+$  calcd for  $\text{C}_{31}\text{H}_{27}\text{NNaO}_5\text{S}$ : 548.1502, found: 548.1476.

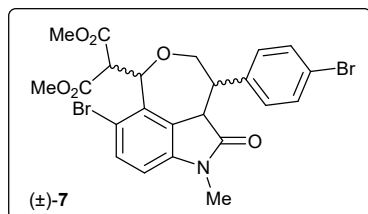

**Dimethyl**

**2-(9-bromo-4-(4-bromophenyl)-6-methyl-5-oxo-1,3,4,4a,5,6-hexahydrooxepino[5,4,3-cd]indol-1-yl)malonate** ( $\pm$ )-**7**.<sup>4</sup> To a solution of ( $\pm$ )-**3af** (0.1 mmol, 1 equiv, 47 mg) and KBr (0.1 mmol, 1 equiv, 12 mg) in *t*BuOH/H<sub>2</sub>O (20:1) (2 mL) at room temperature, was added oxone (0.12 mmol, 1.2 equiv, 37 mg) and allowed to stir for 4 h under calcium chloride tube. After completion, as monitored by TLC, the reaction mixture was quenched with saturated aq. Na<sub>2</sub>S<sub>2</sub>O<sub>3</sub> (5 mL) and extracted with ethyl acetate (3 x 10 mL). The combined organic layers were washed with brine (5 mL). Drying (Na<sub>2</sub>SO<sub>4</sub>) and evaporation of the solvent gave a residue that was purified by silica gel column chromatography using hexane and ethyl acetate as an eluent to afford ( $\pm$ )-**7**. Analytical TLC on silica gel, 1:9 ethyl acetate/hexane *R<sub>f</sub>* = 0.30; colorless solid; mp 154-155 °C; yield 55% (31 mg); mixture of diastereomers (dr = 3:1); <sup>1</sup>H NMR (400 MHz, CDCl<sub>3</sub>)  $\delta$  7.55 (d, *J* = 8.4 Hz, 1H), 7.30 (t, *J* = 8 Hz, 0.49H), 7.24-7.20 (m, 2.63H), 6.86 (d, *J* = 8 Hz, 0.35H), 6.71 (d, *J* = 7.6 Hz, 0.34H), 6.63 (d, *J* = 8 Hz, 1H), 6.57-6.53 (m, 2.46H), 5.57-5.56 (m, 1H), 5.53-5.51 (m, 0.32H), 4.57 (d, *J* = 8.8 Hz, 1H), 4.43-4.38 (m, 1.67H), 4.34 (d, *J* = 2.4 Hz, 1H), 4.07-4.00 (m, 1.36H), 3.84 (s, 3H), 3.72-3.71 (m, 2H), 3.63 (s, 3H), 3.52-3.46 (m, 1.34H), 2.90 (s, 1H), 2.87 (s, 3H), <sup>13</sup>C NMR (125 MHz, CDCl<sub>3</sub>)  $\delta$  176.0, 175.7, 167.8, 167.2, 166.97, 166.91, 145.1, 144.4, 137.5, 137.0, 135.1, 134.1, 133.6, 131.6, 131.5, 129.88, 129.80, 129.1, 127.2, 124.5, 121.7, 121.5, 119.9, 113.4, 109.1, 107.6, 82.4, 82.1, 72.7, 72.4, 55.3, 55.1, 53.1, 52.9, 52.8, 52.7, 46.9, 46.6, 45.9, 45.7, 29.8, 26.0; FT-IR (KBr) 2955, 2881, 1715, 1602, 1437, 1354, 1146, 1009, 1071, 809 cm<sup>-1</sup>; HRMS (ESI) *m/z* [M+H]<sup>+</sup> calcd for C<sub>23</sub>H<sub>22</sub>Br<sub>2</sub>NO<sub>6</sub>: 565.9808, found: 565.9805.

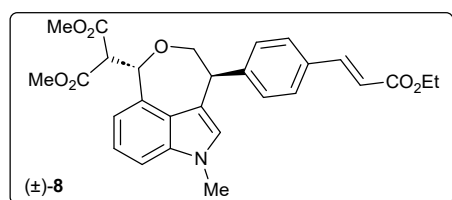**Dimethyl**

**(E)-2-(4-(4-(3-ethoxy-3-oxoprop-1-en-1-yl)phenyl)-6-methyl-1,3,4,6-tetrahydrooxepino[5,4,3-cd]indol-1-yl)malonate** ( $\pm$ )-**8**.<sup>5</sup> To a solution of ( $\pm$ )-**3af** (0.1 mmol, 1 equiv, 47 mg) in CH<sub>3</sub>CN (2 mL), was added ethyl acrylate (0.2 mmol, 2 equiv, 22  $\mu$ L), Et<sub>3</sub>N (0.5 mmol, 5 equiv, 70  $\mu$ L), Pd(OAc)<sub>2</sub> (0.01 mmol, 0.1 equiv, 2.3 mg) and tri-*o*-tolylphosphine (0.02 mmol, 0.2 equiv, 6 mg). The resultant mixture was stirred at 90 °C for 6 h in a pre-heated oil bath

under nitrogen atmosphere. After completion, as monitored by TLC, the reaction mixture was cooled to room temperature, diluted with ethyl acetate (5 mL) and passed through a short pad of celite using ethyl acetate (5 mL). Drying ( $\text{Na}_2\text{SO}_4$ ) and evaporation of the solvent gave a residue that was purified by silica gel column chromatography using hexane and ethyl acetate as eluent to give ( $\pm$ )-**8**. Analytical TLC on silica gel, 1:9 ethyl acetate/hexane  $R_f$  = 0.45; yellow sticky liquid; yield 68% (33 mg);  $^1\text{H}$  NMR (400 MHz,  $\text{CDCl}_3$ )  $\delta$  7.70 (d,  $J$  = 16 Hz, 1H), 7.49-7.47 (m, 2H), 7.30-7.28 (m, 2H), 7.25-7.15 (m, 2H), 6.78 (d,  $J$  = 7.2 Hz, 1H), 6.478-6.474 (m, 1H), 6.44 (d,  $J$  = 16 Hz, 1H), 5.62 (m, 1H), 4.55-4.51 (m, 1H), 4.40-4.35 (m, 2H), 4.29 (q,  $J$  = 7.2 Hz, 2H), 3.89-3.86 (m, 1H), 3.83 (s, 3H), 3.69 (s, 3H), 3.64 (s, 3H), 1.34 (t,  $J$  = 7.2 Hz, 3H);  $^{13}\text{C}$  NMR (125 MHz,  $\text{CDCl}_3$ )  $\delta$  168.5, 167.5, 167.2, 144.6, 144.4, 137.5, 134.7, 133.3, 129.5, 128.47, 128.41, 125.0, 121.4, 118.0, 117.9, 114.5, 108.8, 82.9, 78.7, 60.6, 57.6, 53.0, 52.6, 47.5, 32.9, 14.4; FT-IR (KBr) 2923, 2852, 1737, 1709, 1635, 1454, 1305, 1163, 1090, 1041, 743  $\text{cm}^{-1}$ ; HRMS (ESI)  $m/z$   $[\text{M}+\text{Na}]^+$  calcd for  $\text{C}_{28}\text{H}_{29}\text{NNaO}_7$ : 514.1836, found: 541.1807.

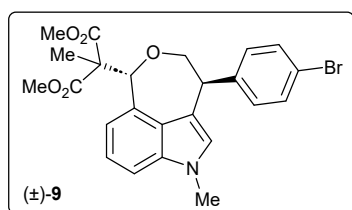

**Dimethyl 2-(4-(4-bromophenyl)-6-methyl-1,3,4,6-tetrahydrooxepino[5,4,3-cd]indol-1-yl)-2-methylmalonate ( $\pm$ )-**9**.**<sup>6</sup> To a solution of NaH (60% dispersion in mineral oil, 0.15 mmol, 1.5 equiv, 6 mg) in THF (2 mL) at 0 °C was added a solution of ( $\pm$ )-**3af** (0.1 mmol, 1 equiv, 47 mg) in THF (3 mL) under nitrogen atmosphere. The resultant mixture was stirred at room temperature for 30 minutes. Then, MeI (0.2 mmol, 2 equiv, 28 mg) was added dropwise and the mixture was allowed to stir overnight at room temperature. After completion, as monitored by TLC, the reaction mixture was quenched with saturated aq.  $\text{NH}_4\text{Cl}$  (5 mL) and extracted with ethyl acetate (3 x 10 mL). Drying ( $\text{Na}_2\text{SO}_4$ ) and evaporation of the solvent gave a residue that was purified by silica gel column chromatography using hexane and ethyl acetate as eluent to give ( $\pm$ )-**9**. Analytical TLC on silica gel, 1:9 ethyl acetate/hexane  $R_f$  = 0.60; colorless sticky liquid; yield 91% (44 mg);  $^1\text{H}$  NMR (600 MHz,  $\text{CDCl}_3$ )  $\delta$  7.44 (d,  $J$  = 8.4 Hz, 2H), 7.24-7.23 (m, 1H), 7.16-7.13 (m, 3H), 6.67 (d,  $J$  = 7.8 Hz, 1H), 6.46 (s, 1H), 5.89 (s, 1H), 4.41-4.38 (m, 1H), 4.24 (dd,  $J$  = 11.4, 4.8 Hz, 1H), 3.86-3.82

(m, 4H), 3.78 (s, 3H), 3.68 (s, 3H), 1.49 (s, 3H);  $^{13}\text{C}$  NMR (125 MHz,  $\text{CDCl}_3$ )  $\delta$  171.3, 170.4, 141.2, 137.7, 133.5, 131.7, 130.7, 128.6, 125.7, 121.2, 120.8, 118.0, 116.2, 108.5, 86.7, 78.6, 60.8, 53.1, 53.0, 47.1, 32.9, 14.6; FT-IR (KBr) 2925, 2855, 1736, 1455, 1299, 1155, 1010, 747  $\text{cm}^{-1}$ ; HRMS (ESI)  $m/z$   $[\text{M}+\text{Na}]^+$  calcd for  $\text{C}_{24}\text{H}_{24}\text{BrNNaO}_5$ : 508.0730, found: 508.0725.

## References

1. For preparation of indoles, see: a) S. Romanini, E. Galletti, L. Caruana, A. Mazzanti, F. Himo, S. Santoro, M. Fochi and L. Bernardi, *Chem. -Eur. J.*, 2015, **21**, 17578; b) S. Kar, P. K. Maharana, T. Punniyamurthy and V. Trivedi, *Org. Lett.*, 2023, **25**, 8850.
2. For preparation of oxiranes, see: a) Y. Kurosaki, T. Fukuda and M. Iwao, *Tetrahedron*, 2005, **61**, 3289; b) P. K. Maharana, T. Sarkar, S. Kar, S. K. Purkayastha, A. K. Guha and T. Punniyamurthy, *J. Org. Chem.*, 2023, **88**, 9447; c) L. Jiang, H. Yang, Q. Xiao, Q. Huang, L. Ye and X. Chu, *ACS Sustainable Chem. Eng.*, 2024, **12**, 13774.
3. a) M. Prieto, E. Zurita, E. Rosa, L. Muñoz, P. Lloyd-Williams and E. Giralt, *J. Org. Chem.*, 2004, **69**, 6812; b) E. Hoque, R. Bisht, C. Haldar and B. Chattopadhyay, *J. Am. Chem. Soc.*, 2017, **139**, 7745; c) S. Roy, S. K. Das and B. Chattopadhyay, *Angew. Chem., Int. Ed.*, 2018, **57**, 2238.
4. a) J. Xu, L. Liang, H. Zheng, Y. R. Chi and R. Tong, *Nat. Commun.*, 2019, **10**, 4754; b) C. Adams, D. J. Aldous, S. Amendola, P. Bamborough, C. Bright, S. Crowe, P. Eastwood, G. Fenton, M. Foster, T. K. P. Harrison, S. King, J. Lai, C. Lawrence, J.-P. Letallec, C. McCarthy, N. Moorcroft, K. Page, S. Rao, J. Redford, S. Sadiq, K. Smith, J. E. Souness, S. Thurairatnam, M. Vine and B. Wyman, *Bioorg. Med. Chem. Lett.*, 2003, **13**, 3105.
5. A. Das, M. Chotia and B. Maji, *Org. Lett.*, 2025, **27**, 4997.
6. S. Xing, N. Gu, J. Qin, H. Cui, Y. Li, K. Wang, D. Tian, B. Chen and G. Yu, *Eur. J. Org. Chem.*, 2018, **2018**, 926.

# $^1\text{H}$ , $^{13}\text{C}$ and $^{19}\text{F}$ NMR Spectra

SK-N4-26- $^1\text{H}$

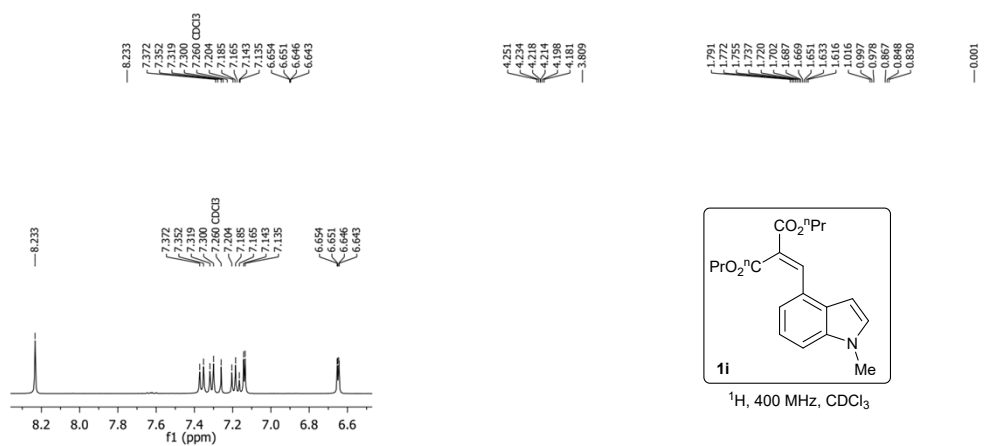

SK-N4-26- $^{13}\text{C}$

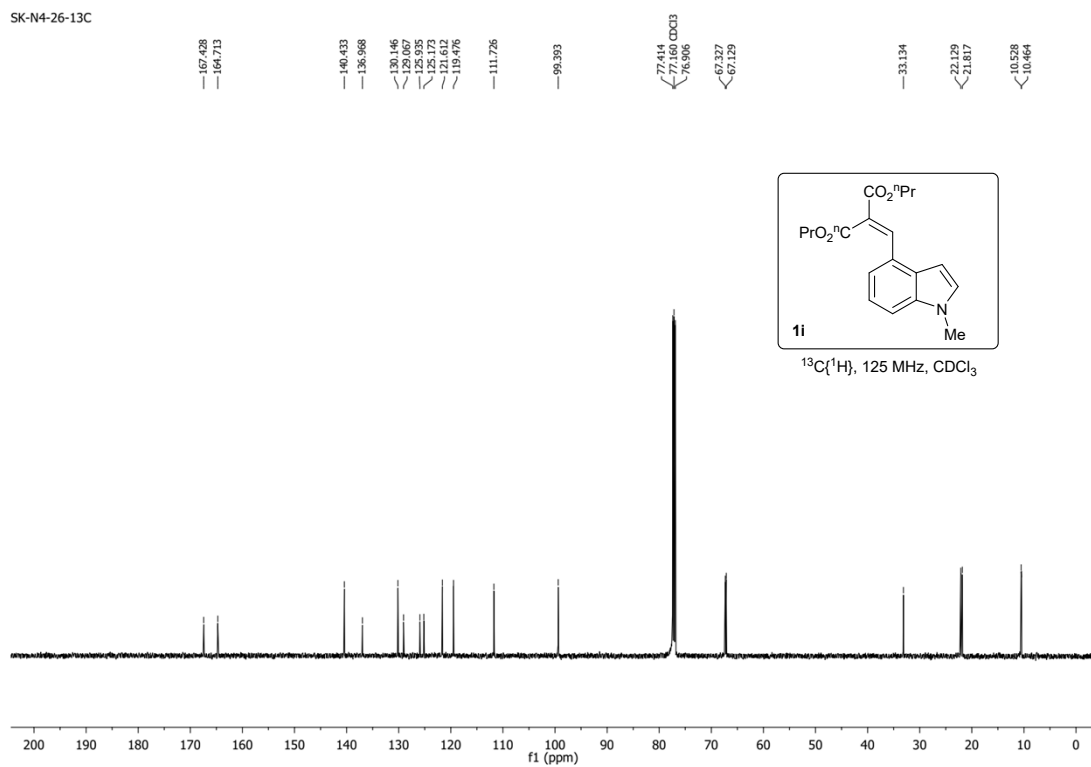

SK-N4-29-1H

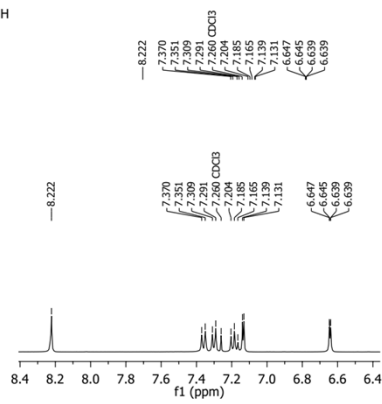

4.323, 4.306, 4.288, 4.276, 4.259, 4.242, 3.805, 1.819, 1.803, 1.789, 1.773, 1.756, 1.739, 1.722, 1.706, 1.689, 1.673, 1.657, 1.643, 1.627, 1.609, 1.592, 1.574, 1.557, 1.541, 1.524, 1.507, 1.491, 1.475, 1.459, 1.443, 1.427, 1.411, 1.395, 1.379, 1.363, 1.347, 1.331, 1.315, 1.299, 1.283, 1.267, 1.251, 1.235, 1.219, 1.203, 1.187, 1.171, 1.155, 1.139, 1.123, 1.107, 1.091, 1.075, 1.059, 1.043, 1.027, 1.011, 0.995, 0.979, 0.963, 0.947, 0.931, 0.915, 0.899, 0.883, 0.867, 0.851, 0.835, 0.819, 0.803, 0.787, 0.771, 0.755, 0.739, 0.723, 0.707, 0.691, 0.675, 0.659, 0.643, 0.627, 0.611, 0.595, 0.579, 0.563, 0.547, 0.531, 0.515, 0.499, 0.483, 0.467, 0.451, 0.435, 0.419, 0.403, 0.387, 0.371, 0.355, 0.339, 0.323, 0.307, 0.291, 0.275, 0.259, 0.243, 0.227, 0.211, 0.195, 0.179, 0.163, 0.147, 0.131, 0.115, 0.099, 0.083, 0.067, 0.051, 0.035, 0.019, 0.003, 0.005

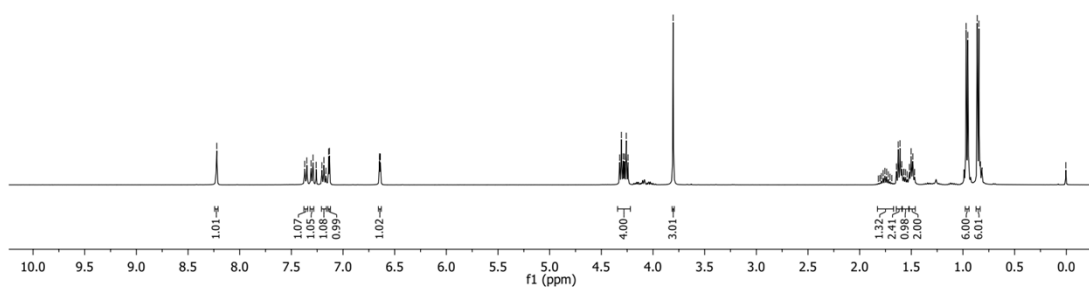

SK-N4-29-13C

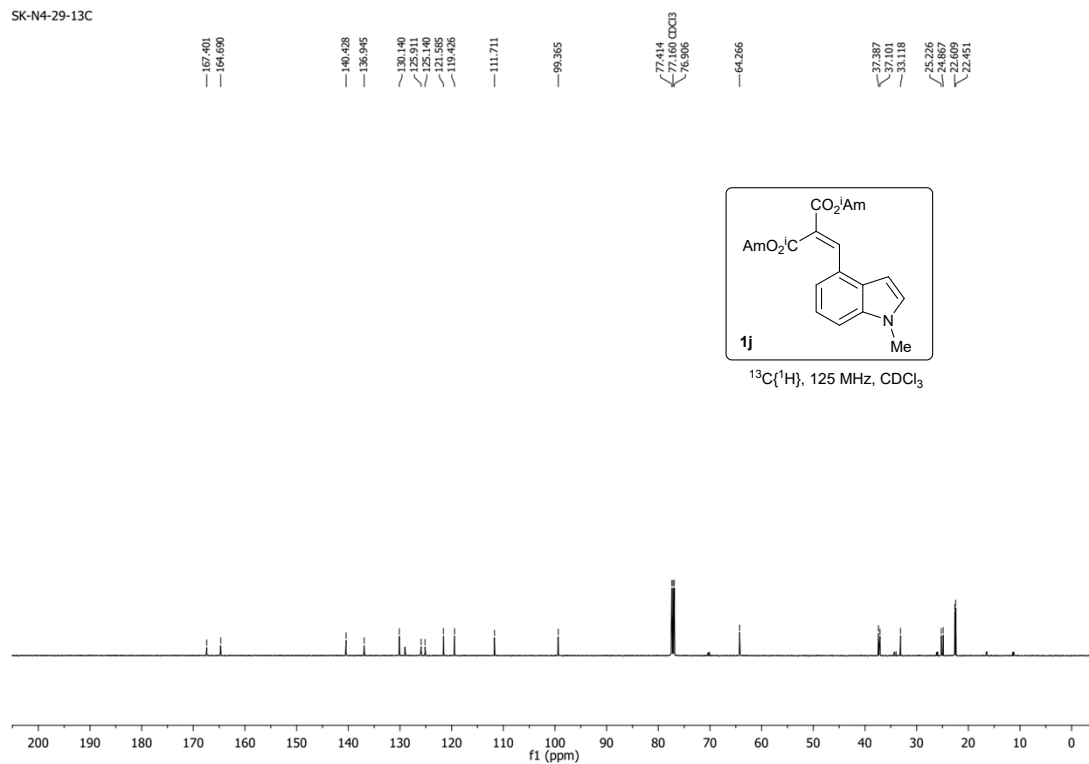

SK-N4-171-1H

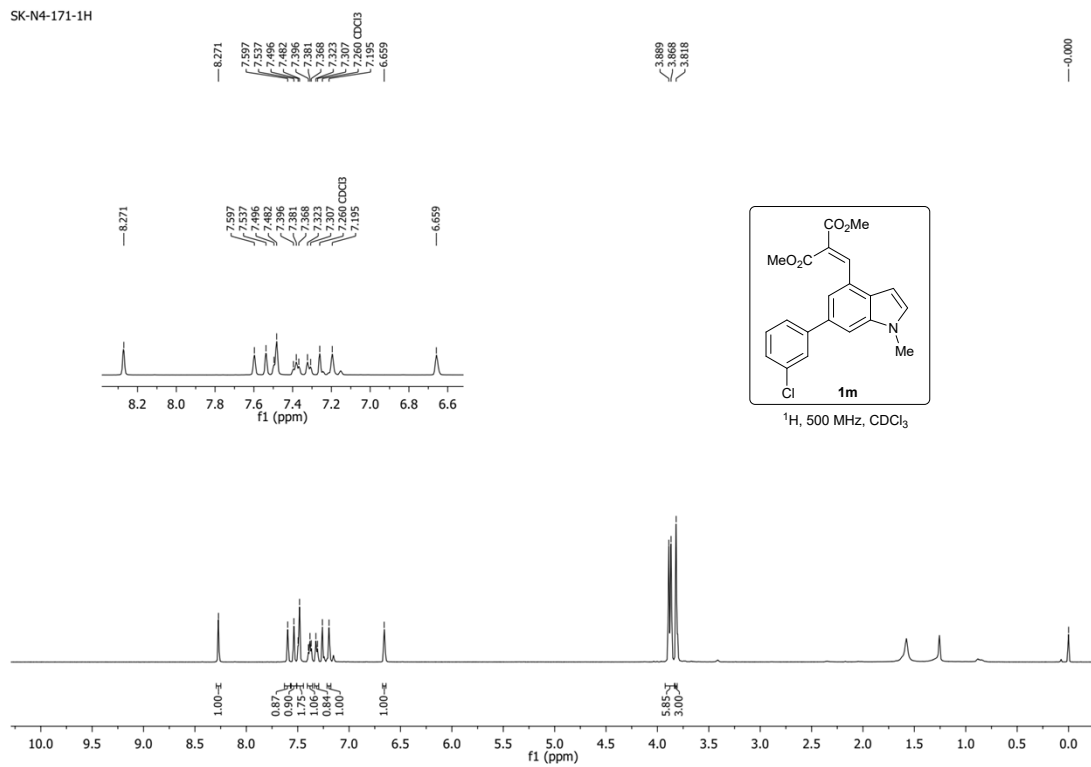

SK-N4-171-13C

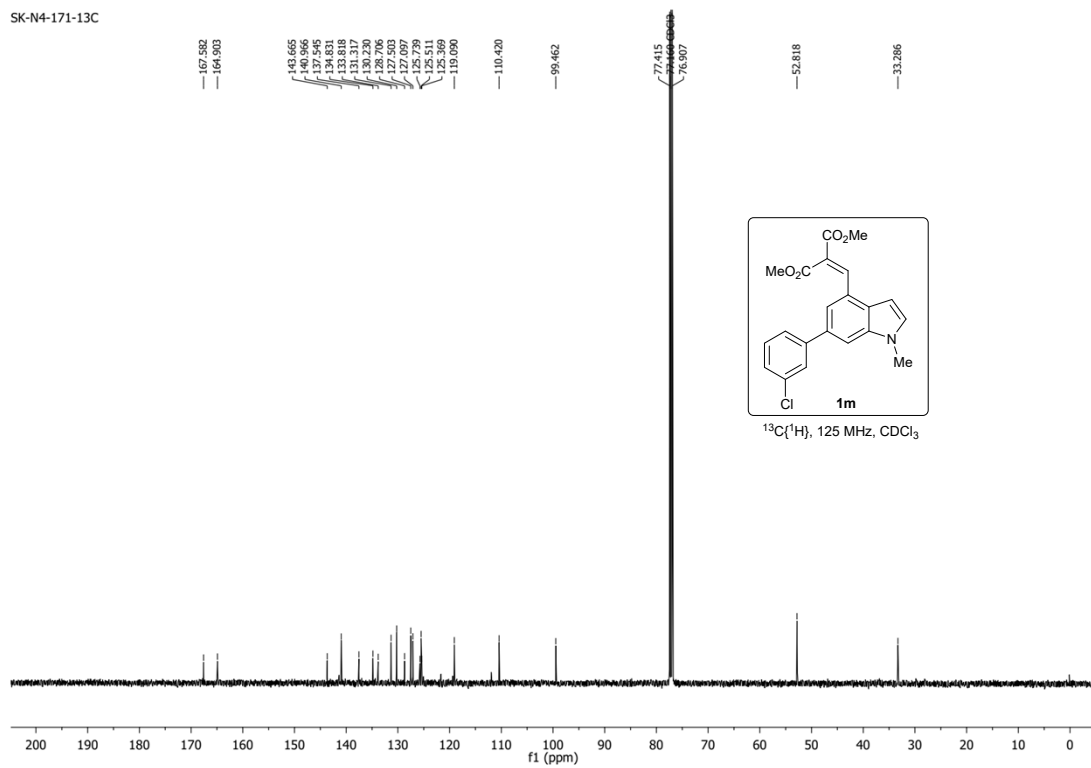

SK-N4-131-1H

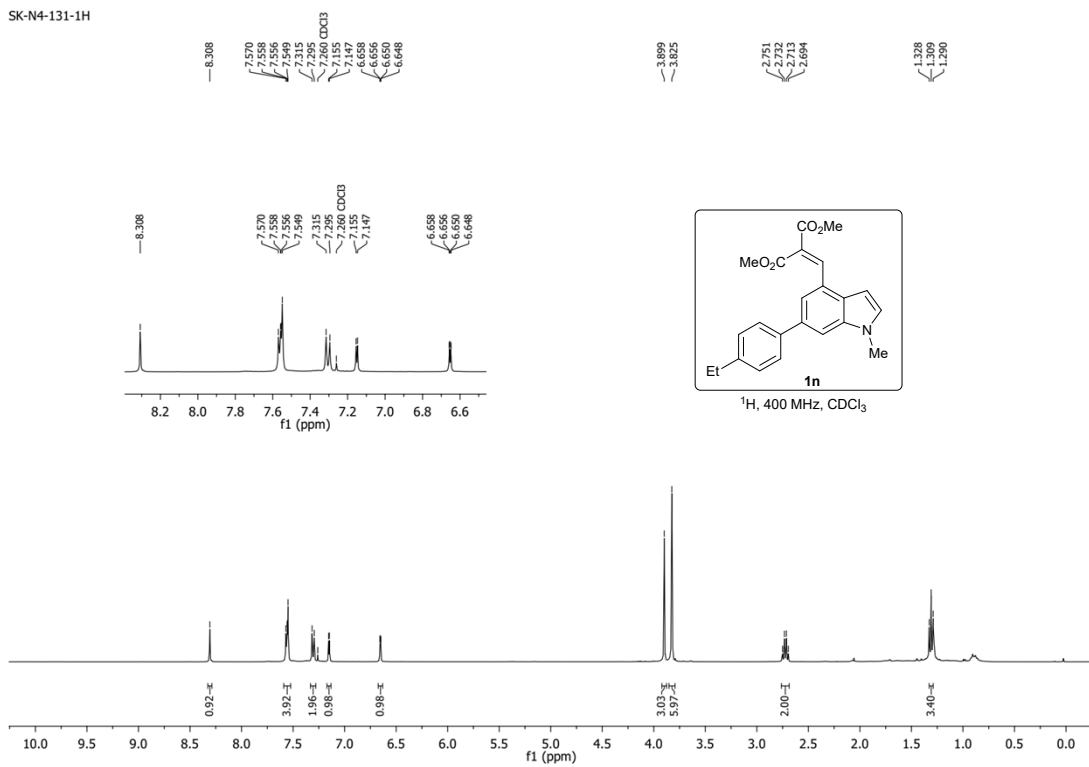

SK-N4-131-13C

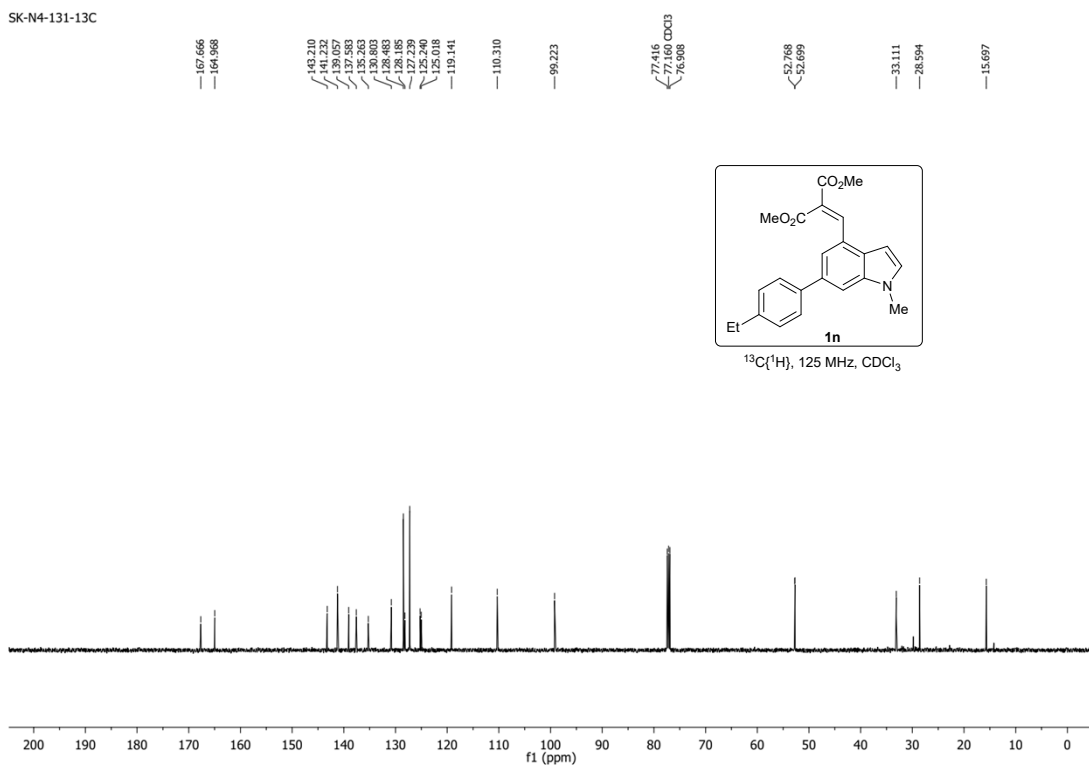

SK-N4-204-1H

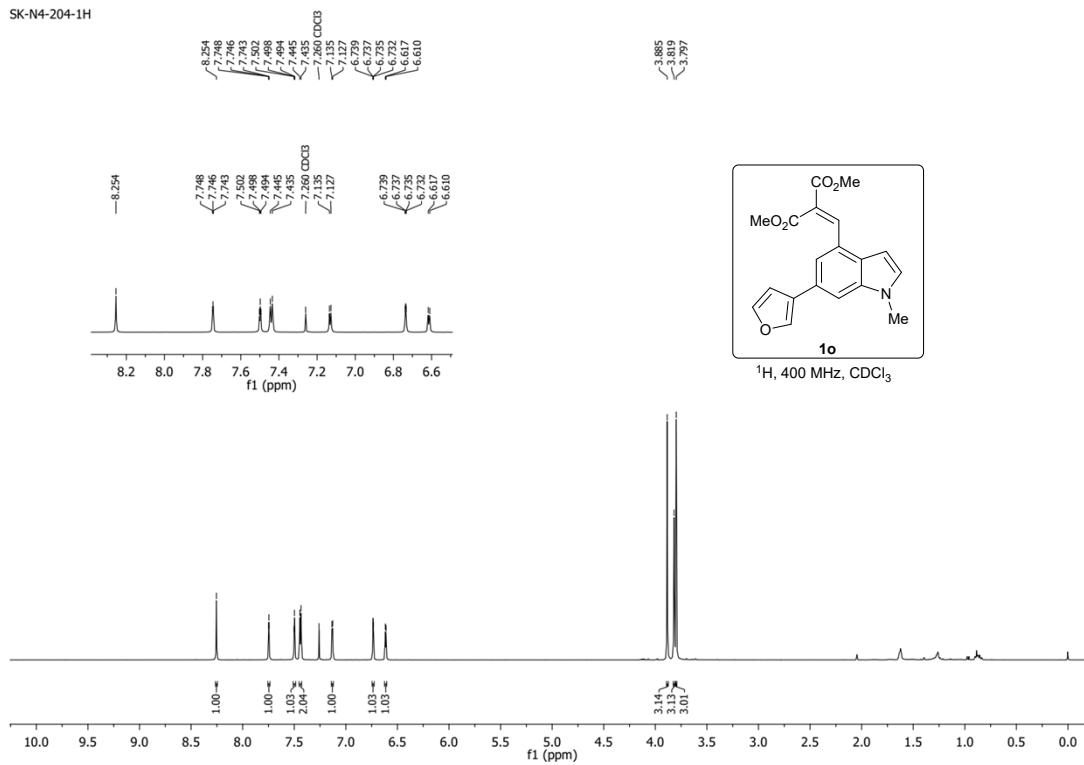

SK-N4-204-13C

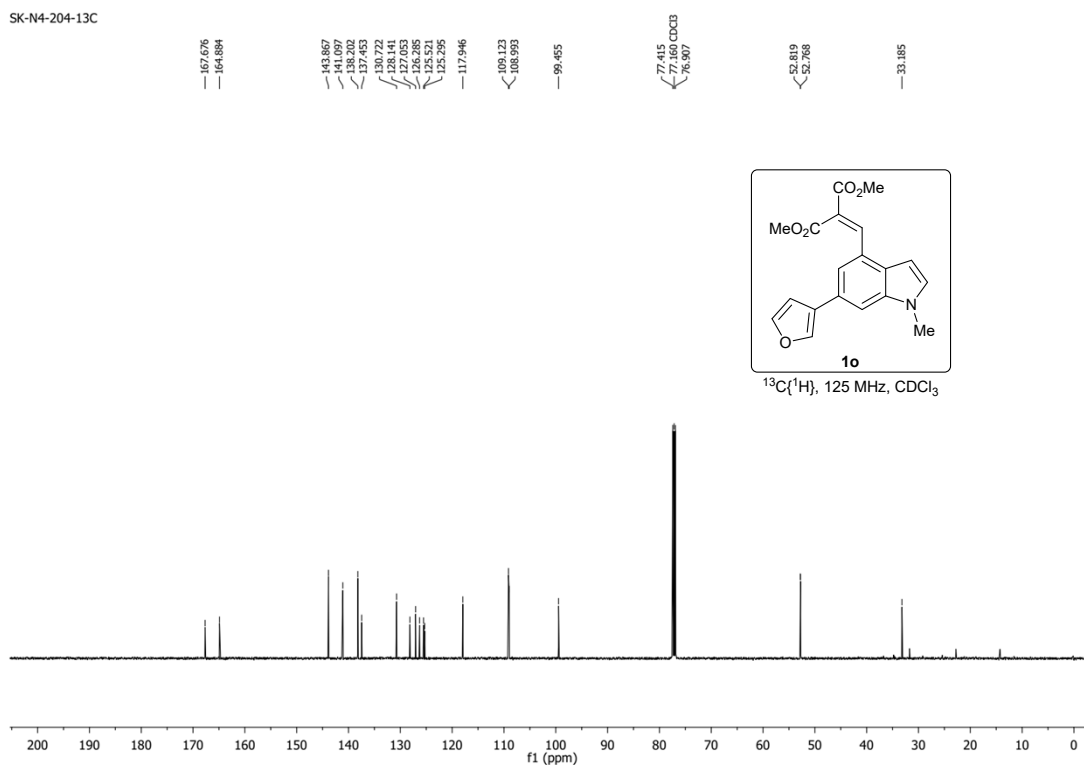

SK-N4-192-1H

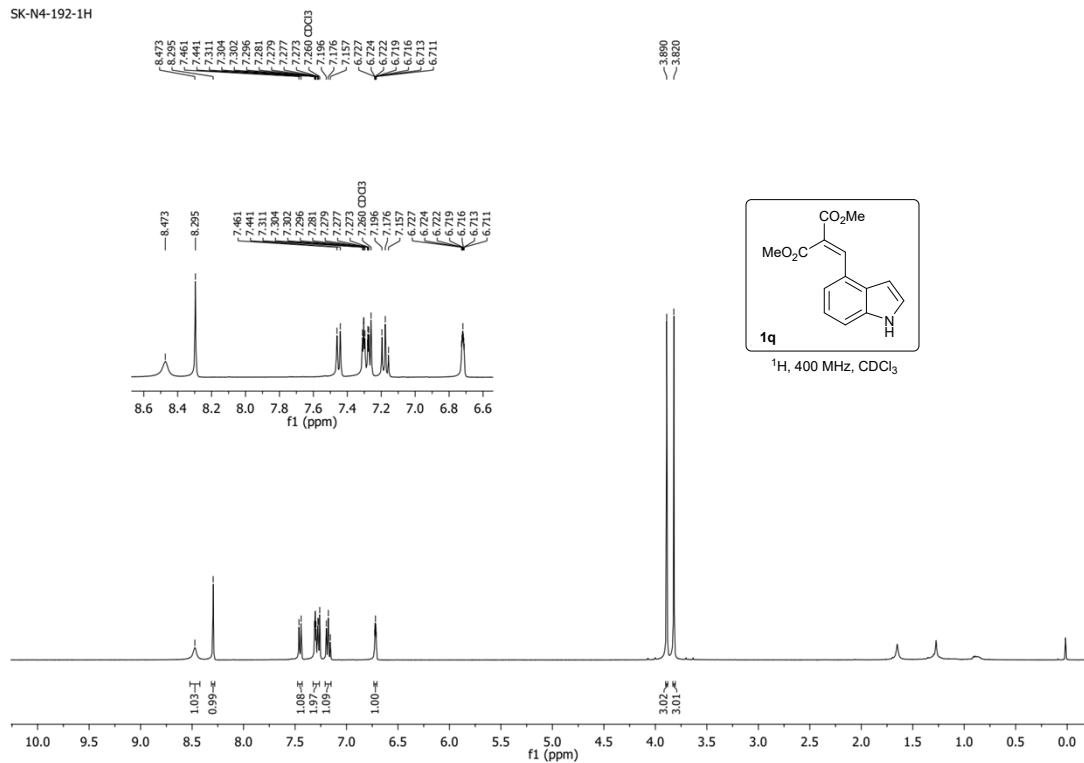

SK-N4-192-13C

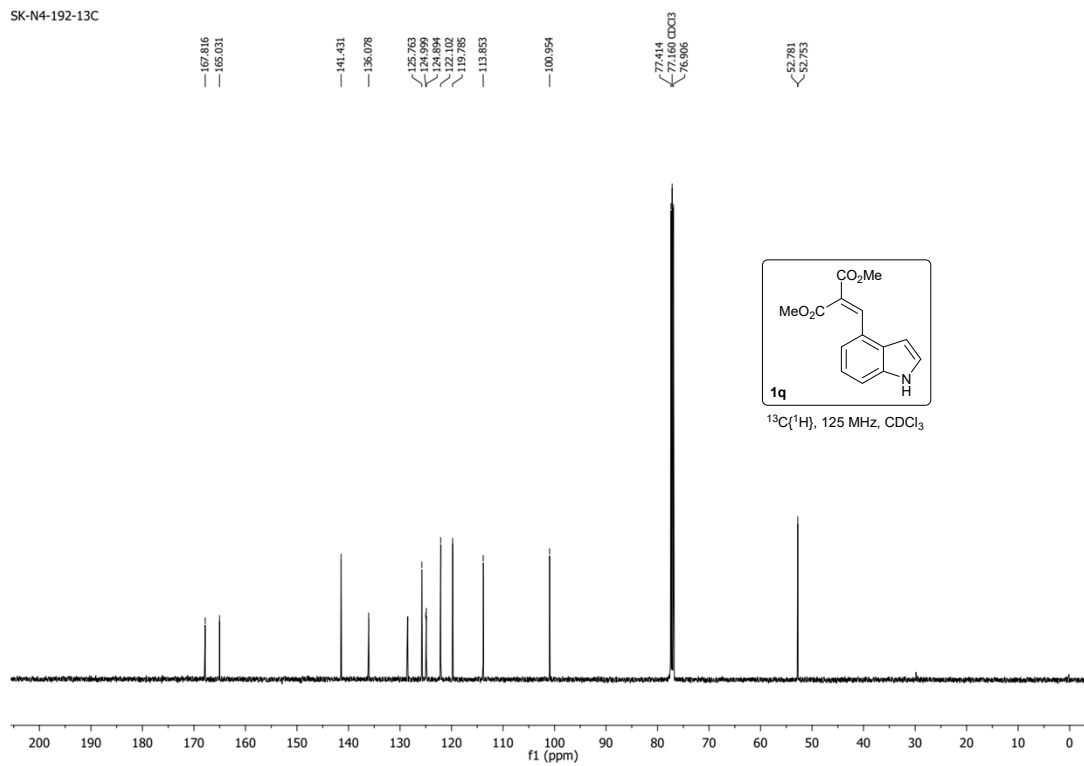

SK-CRV-EPO-1H

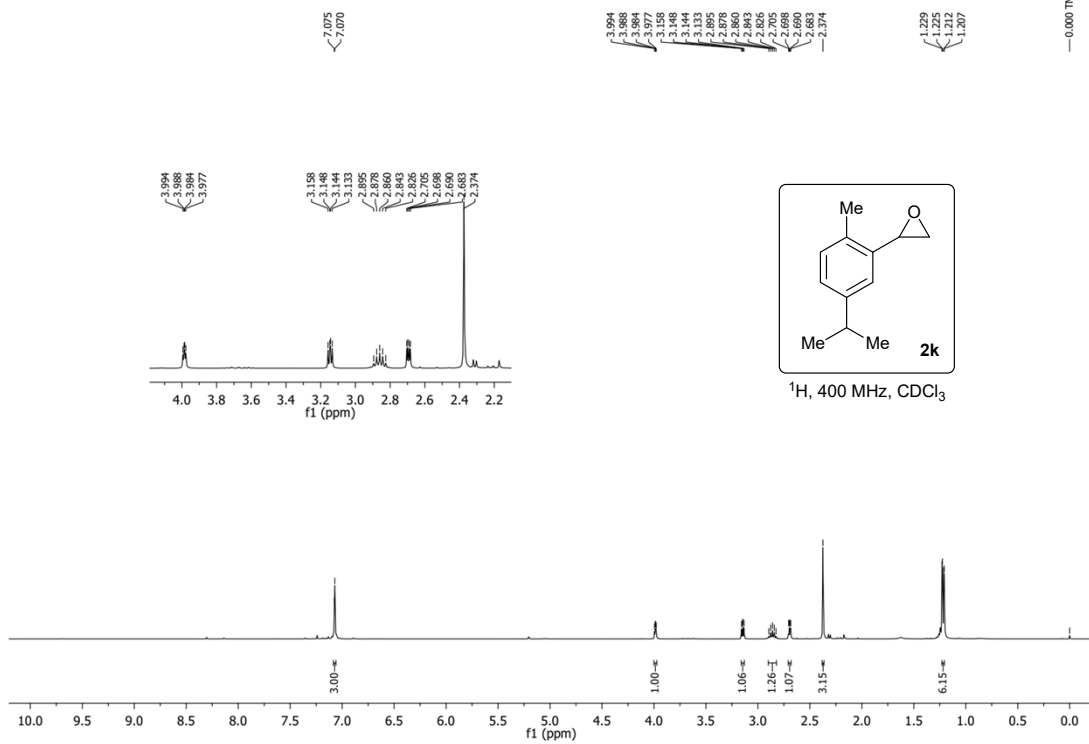

SK-CRV-EPO-13C

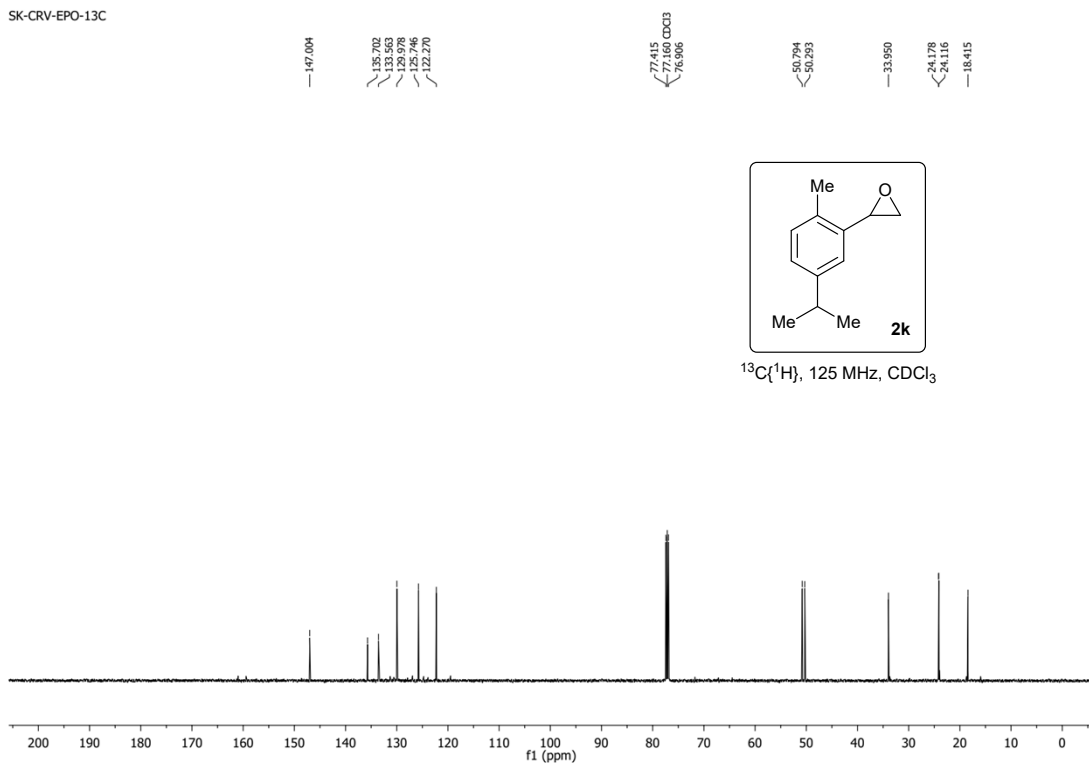

SK-N4-NOR

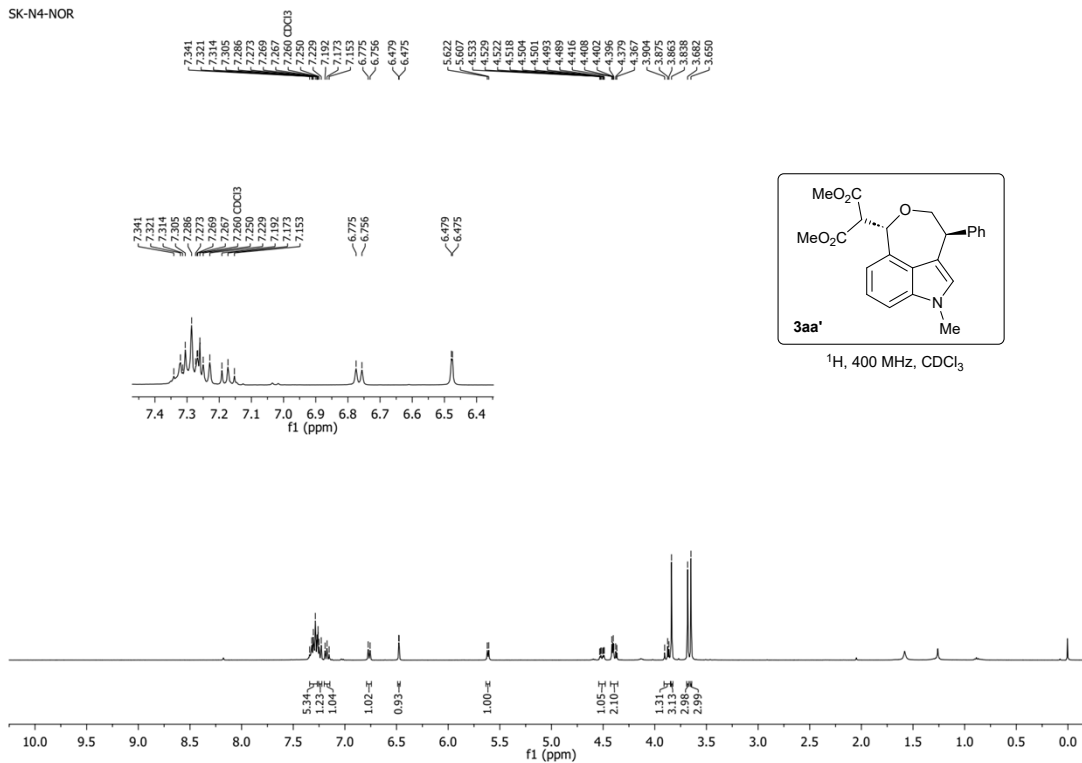

SK-N4-NOR-13C

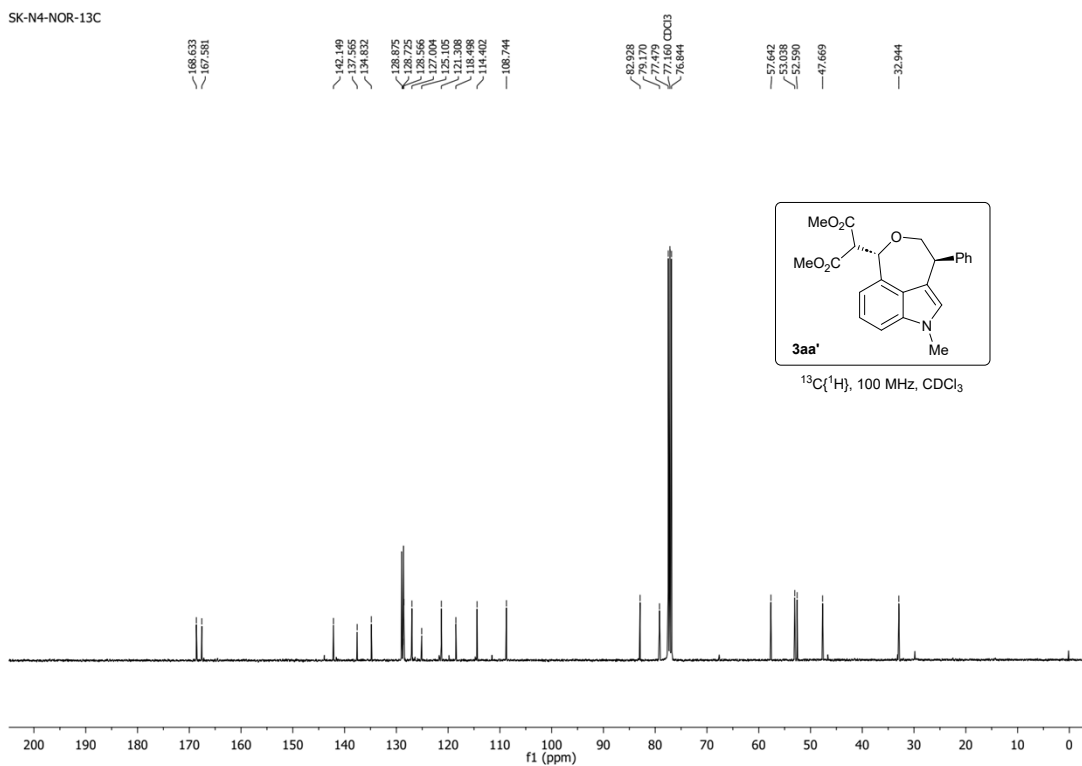

SK-N4-94-R-1H

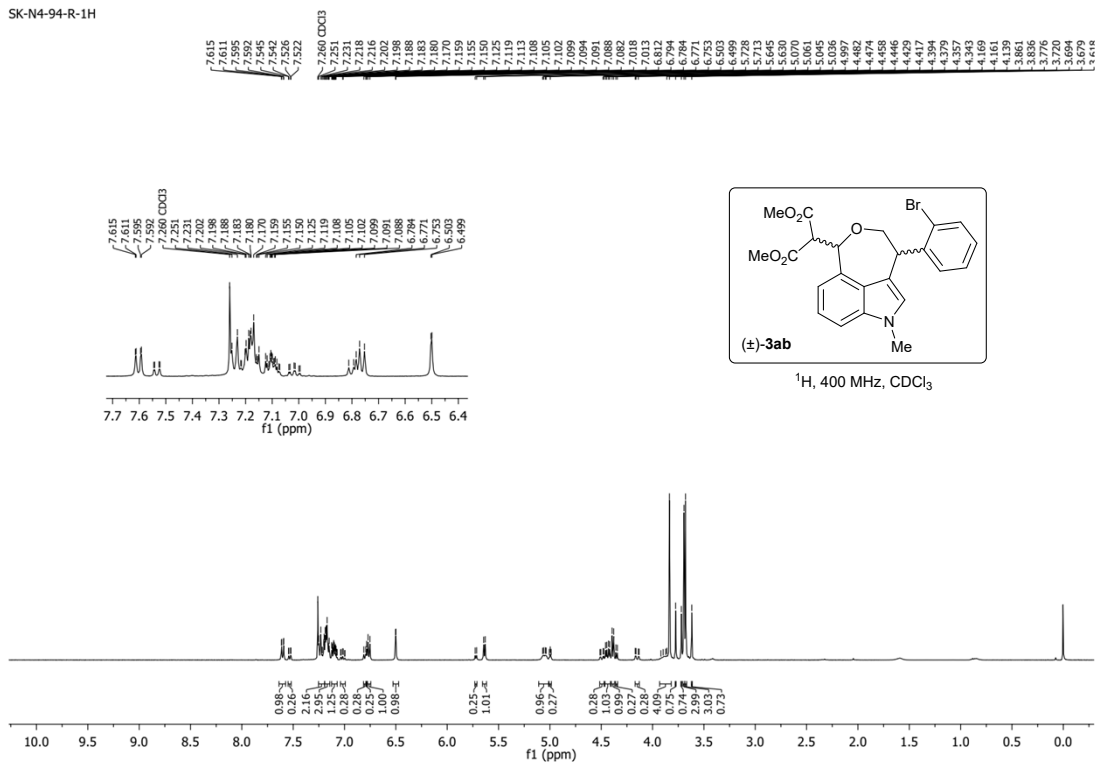

SK-N4-94-13C

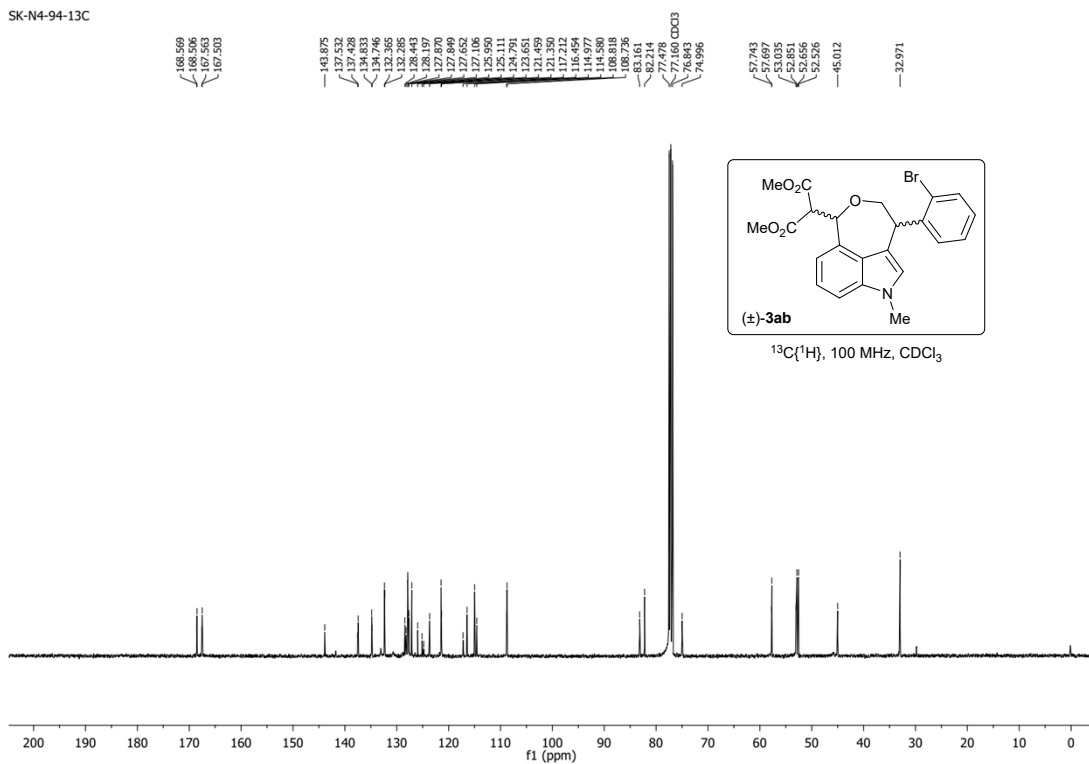

SK-N4-63-1H

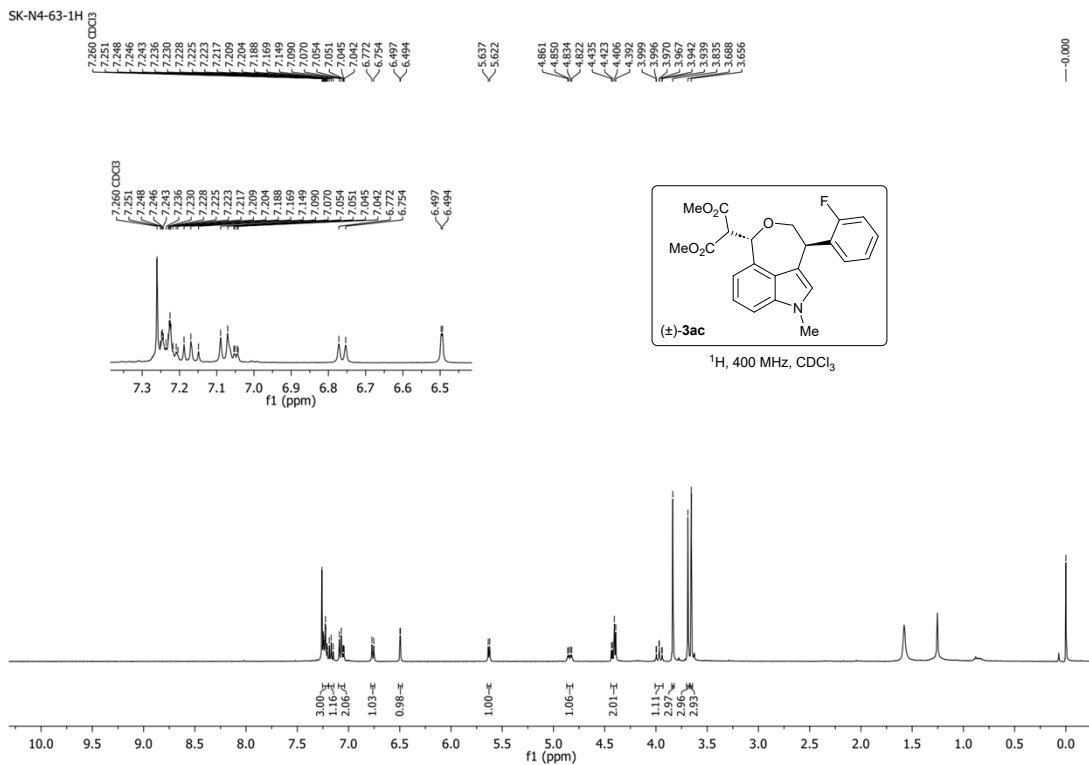

SK-N4-63-13C

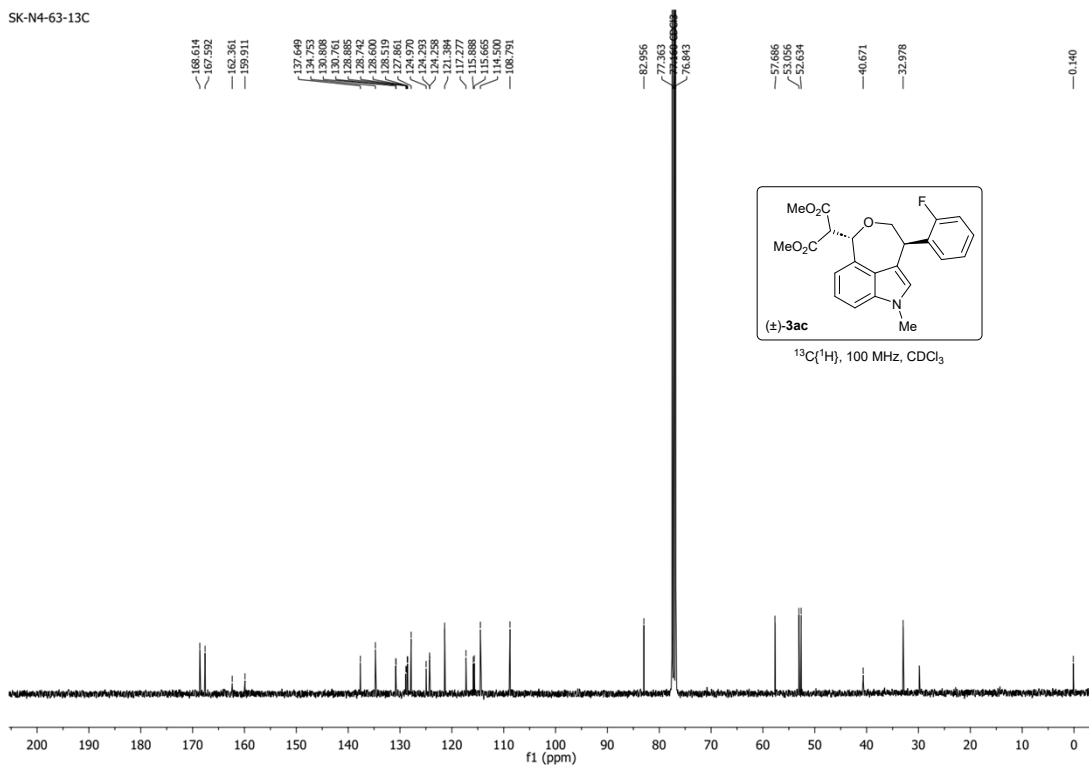

SK-N4-63-19F

—119517

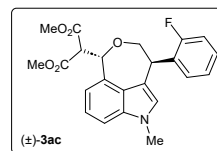

<sup>19</sup>F (376 MHz, CDCl<sub>3</sub>)

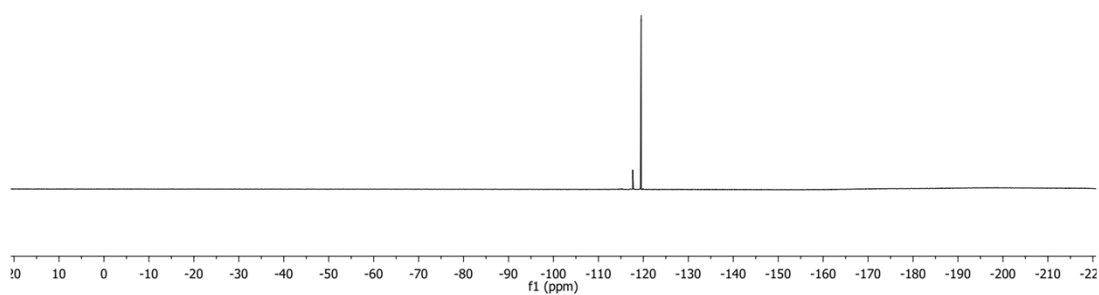

SK-N4-42-1H

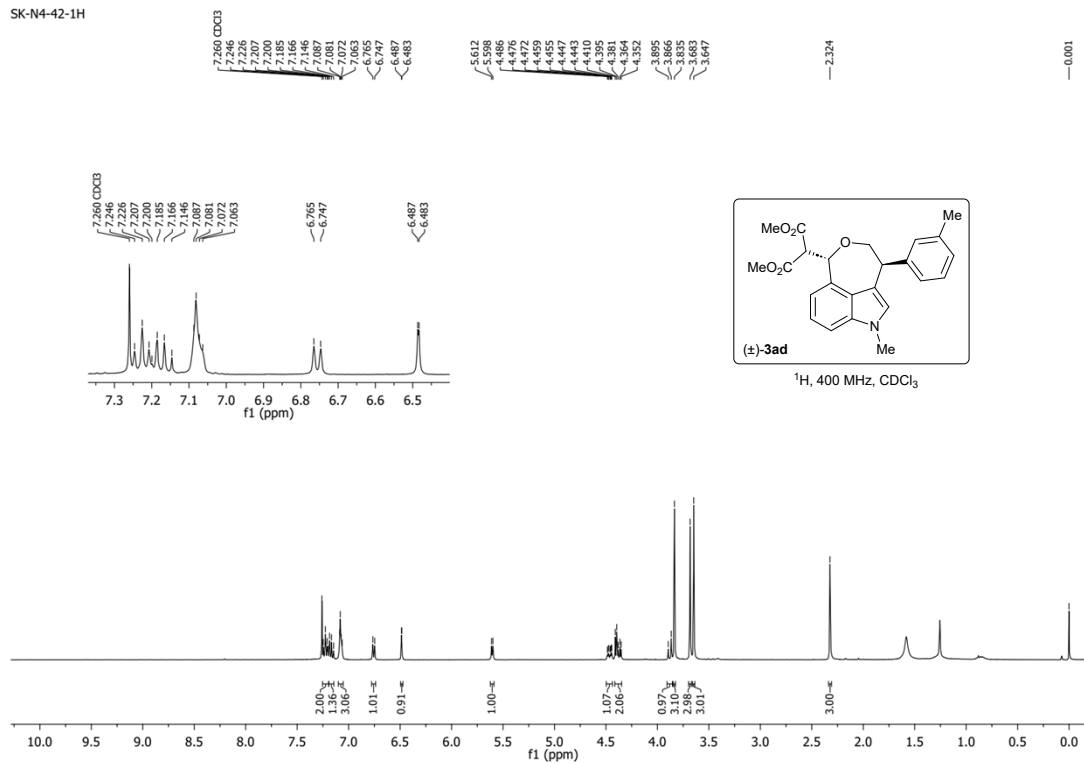

SK-N4-42-13C

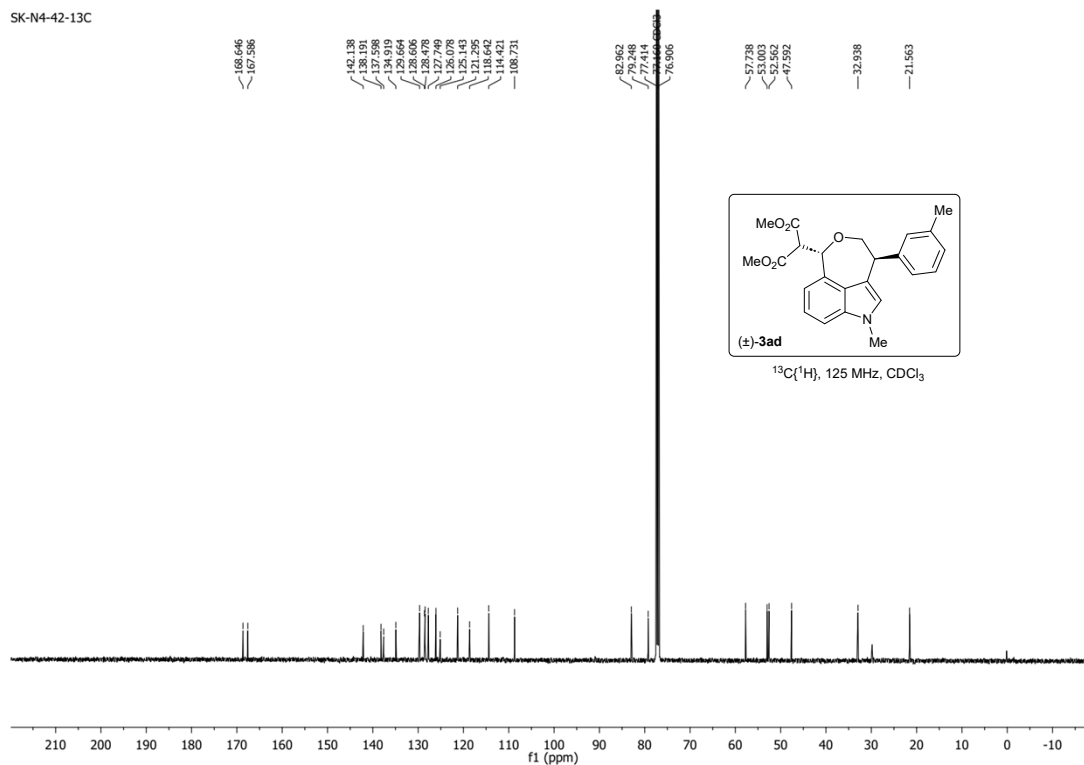

SK-N4-97-1H

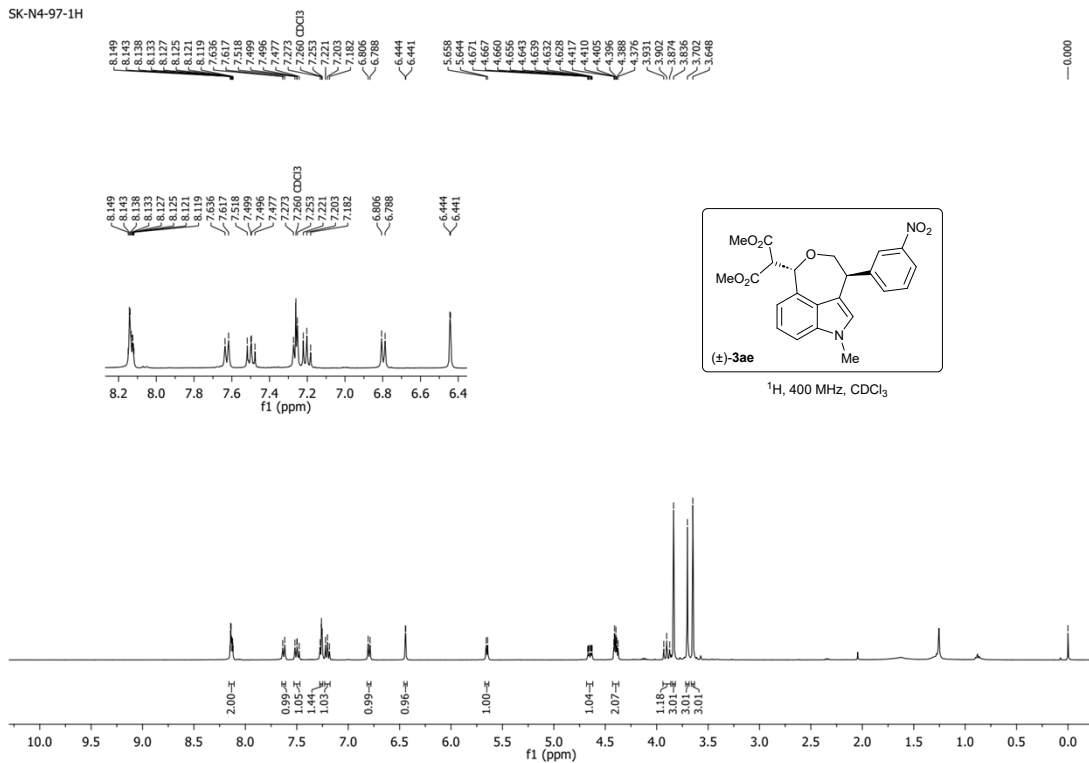

SK-N4-97-13C

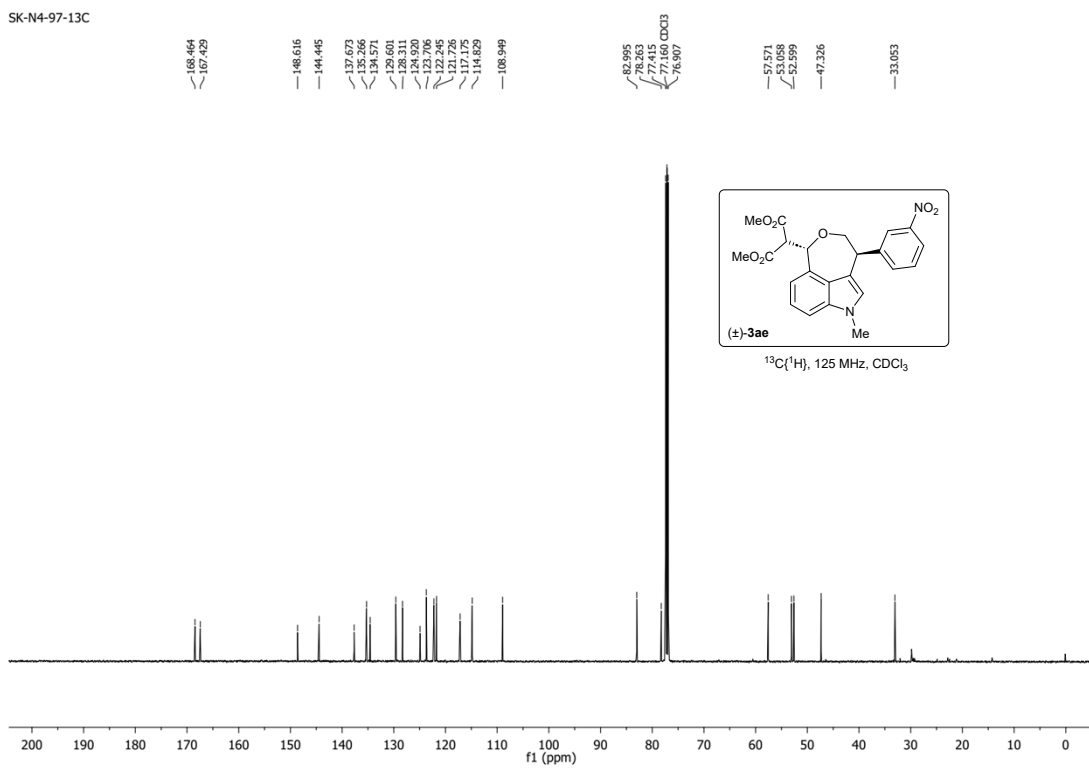

SK-N4-40-1H

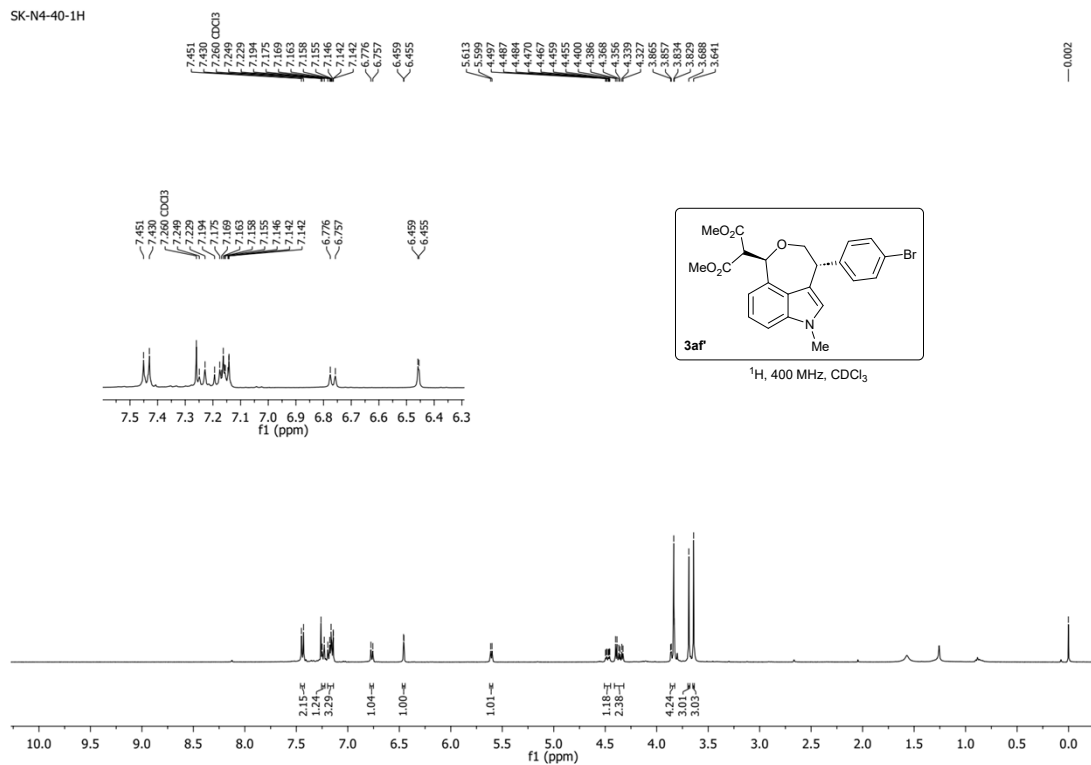

SK-N4-40-13C

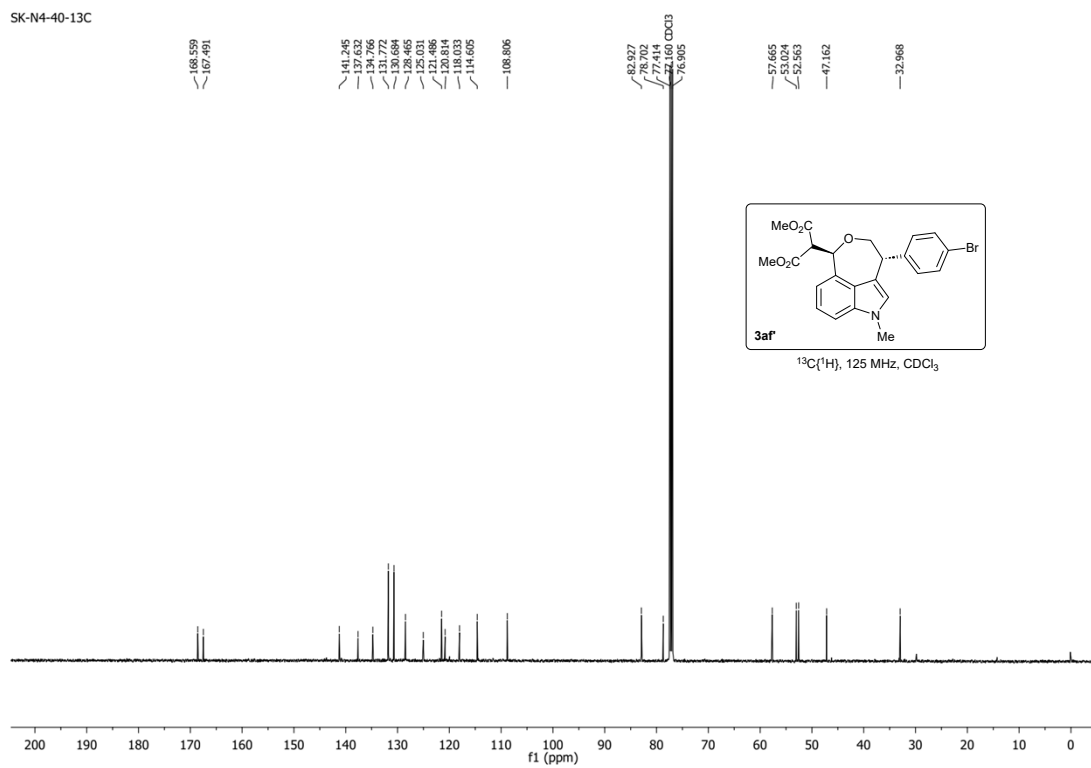

SK-N4-89-1H

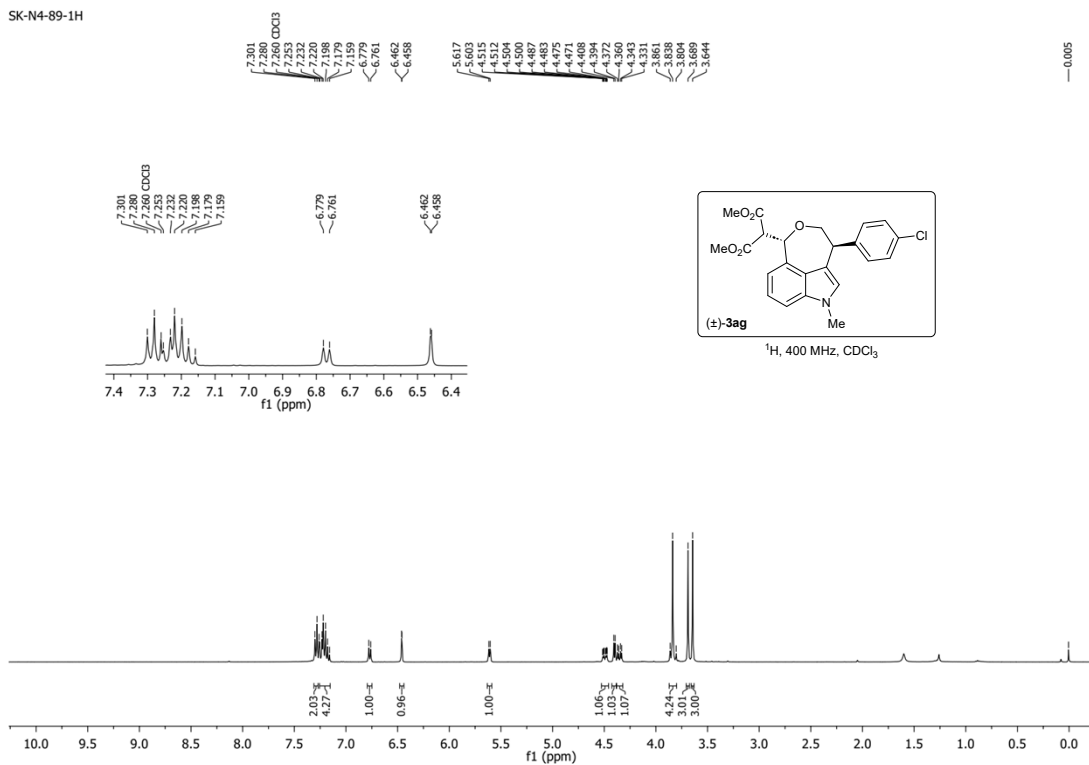

SK-N4-89-13C

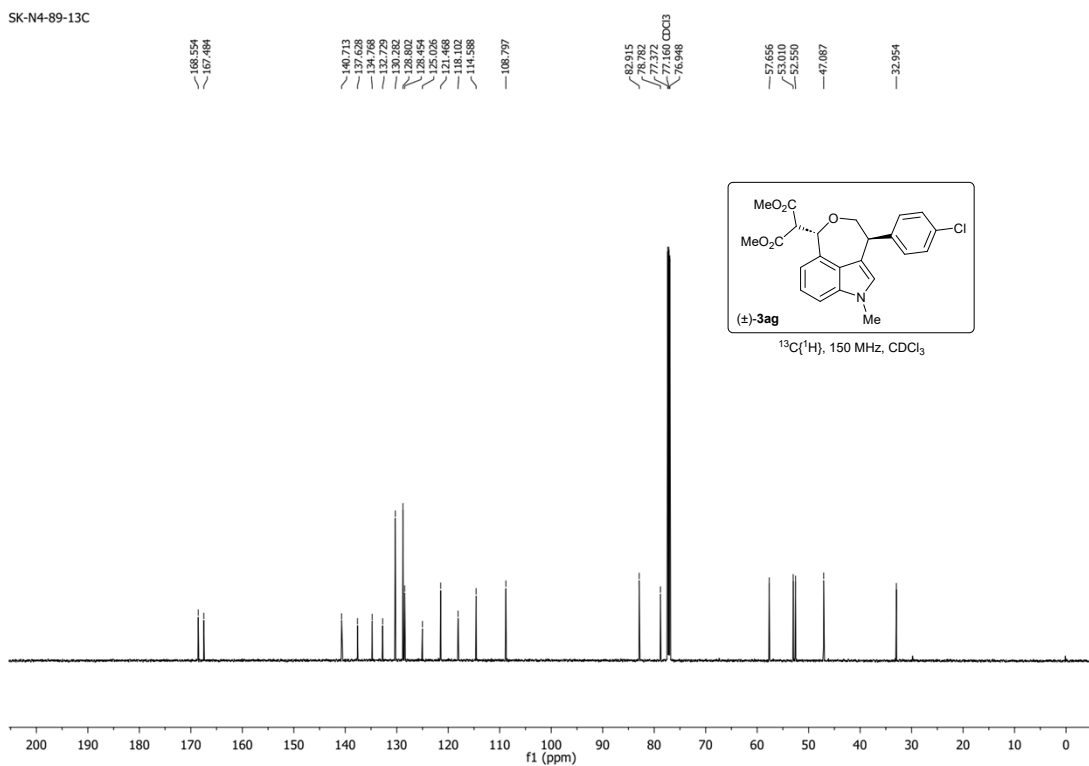

SK-N4-101-1H

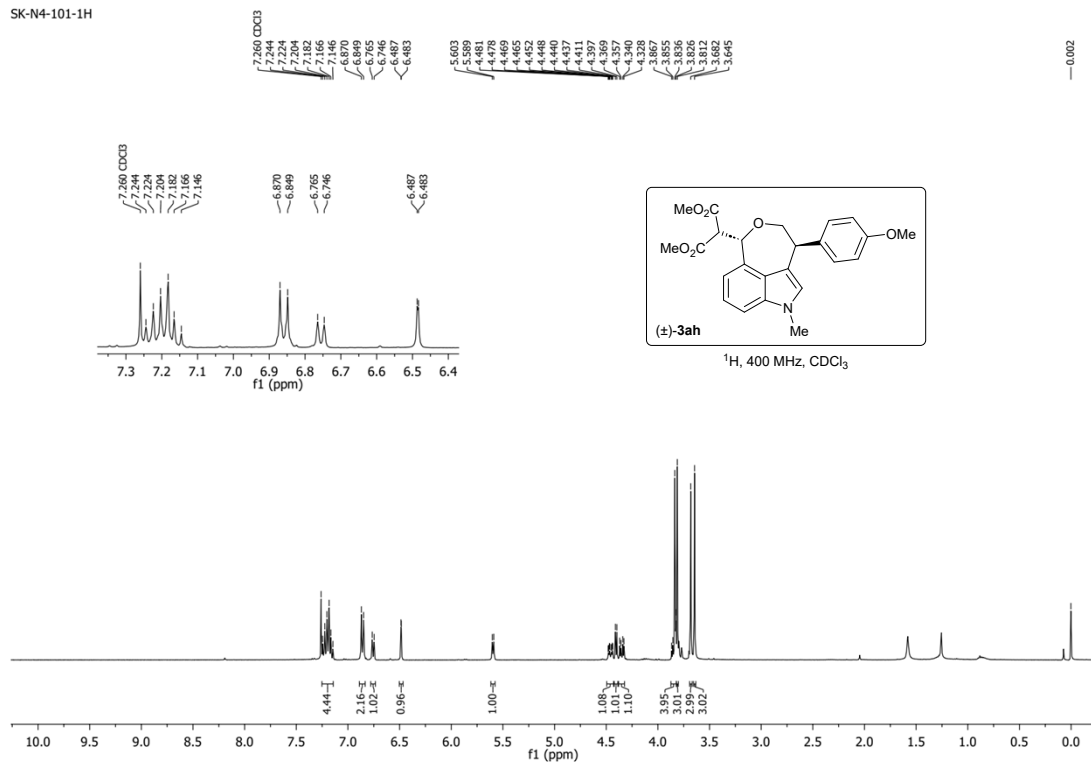

SK-N4-101-13C

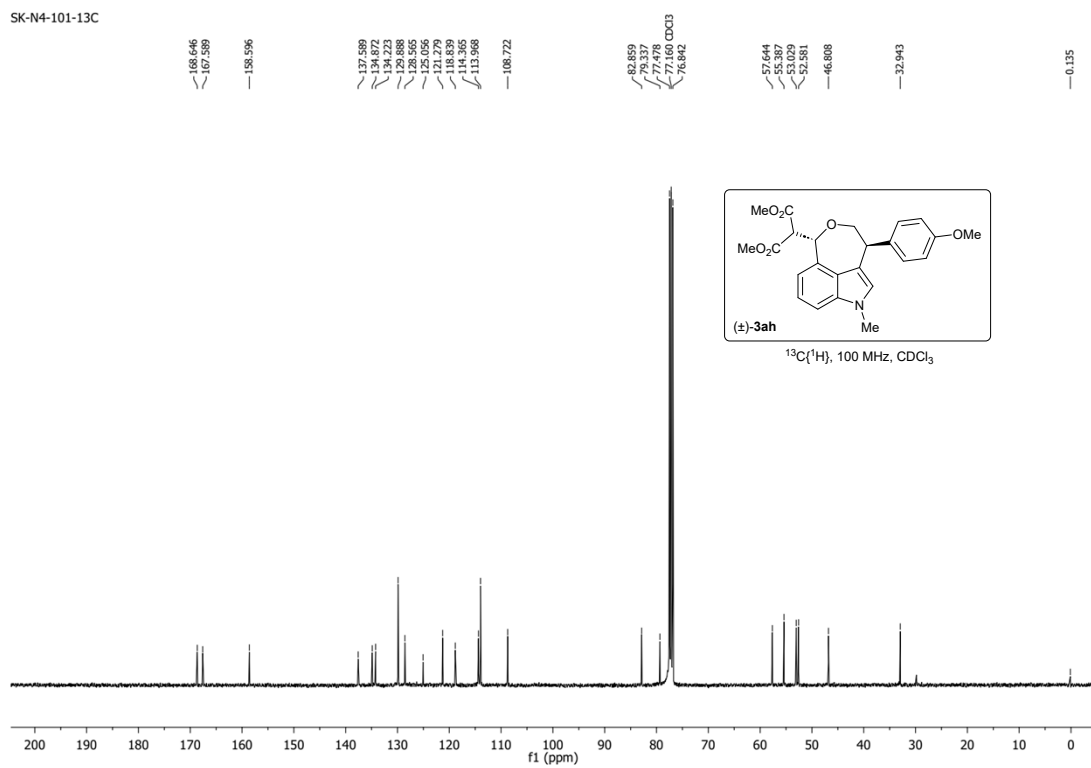

SK-N4-185-1H

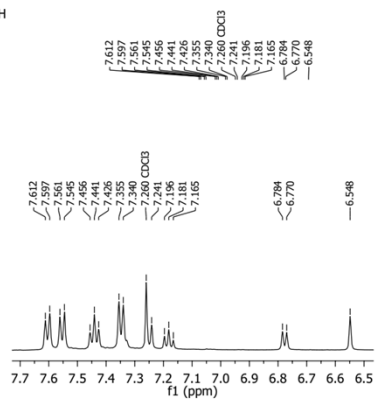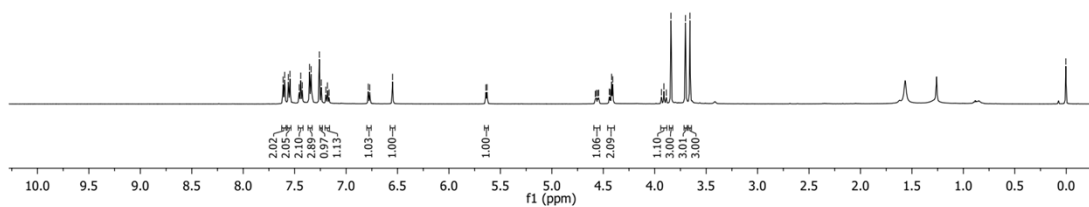

SK-N4-185-13C

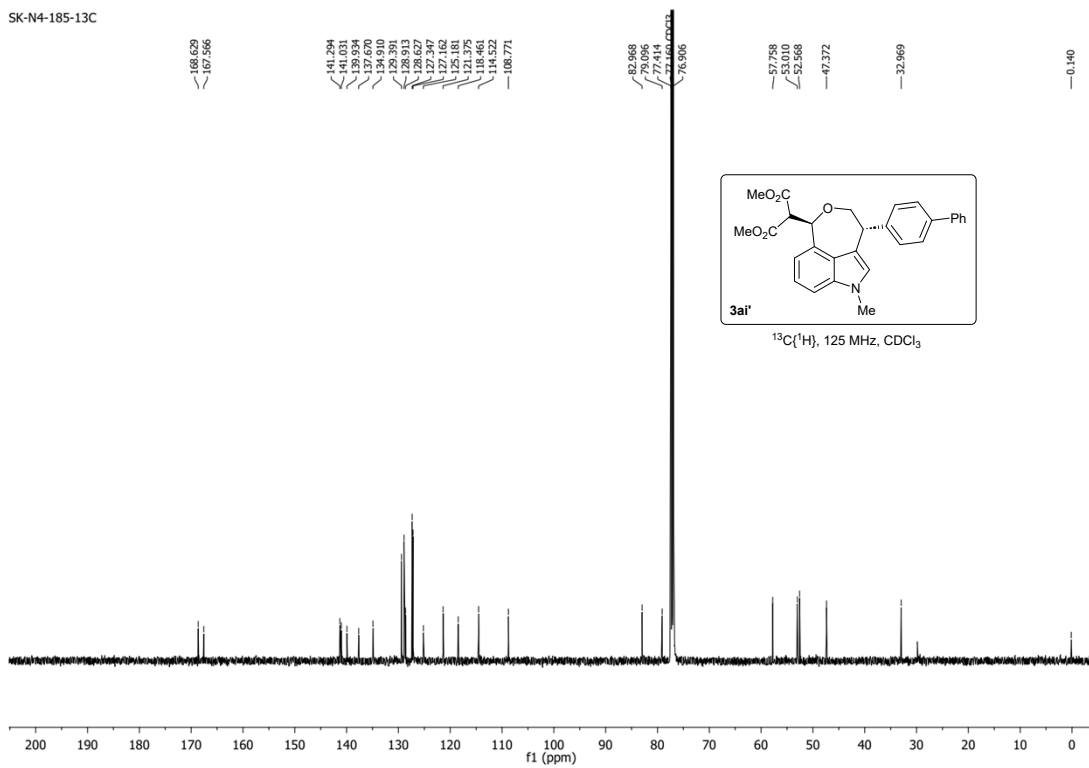

SK-N4-120-1H

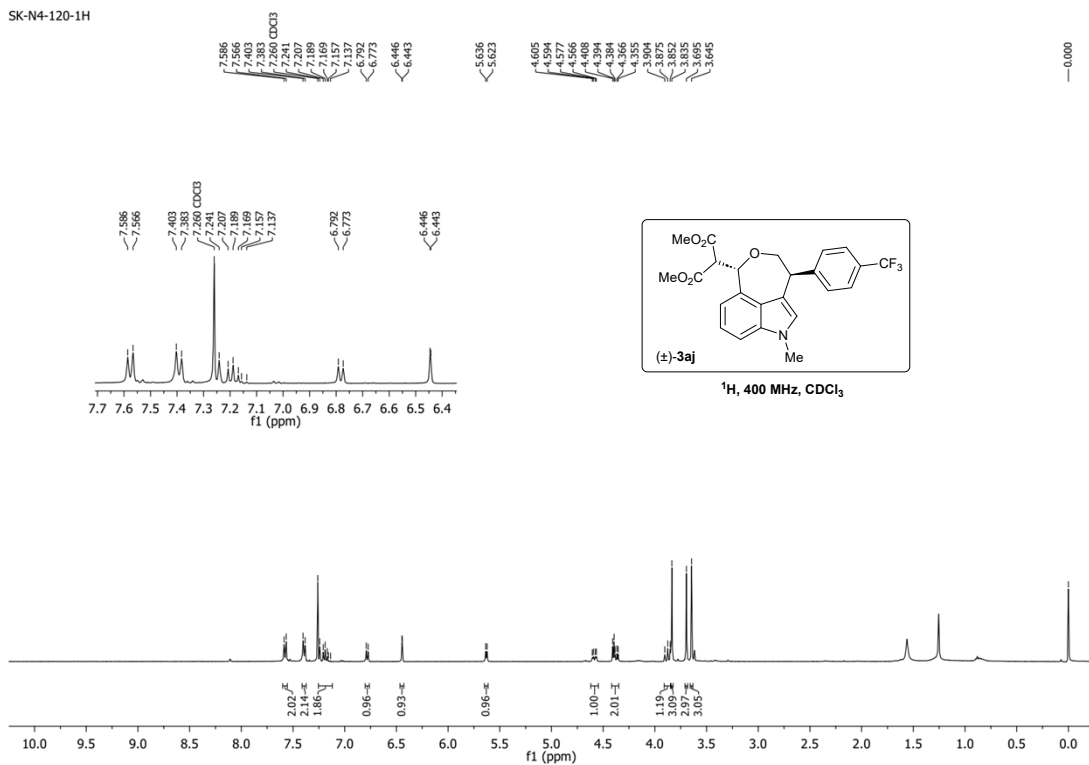

SK-N4-120-13C

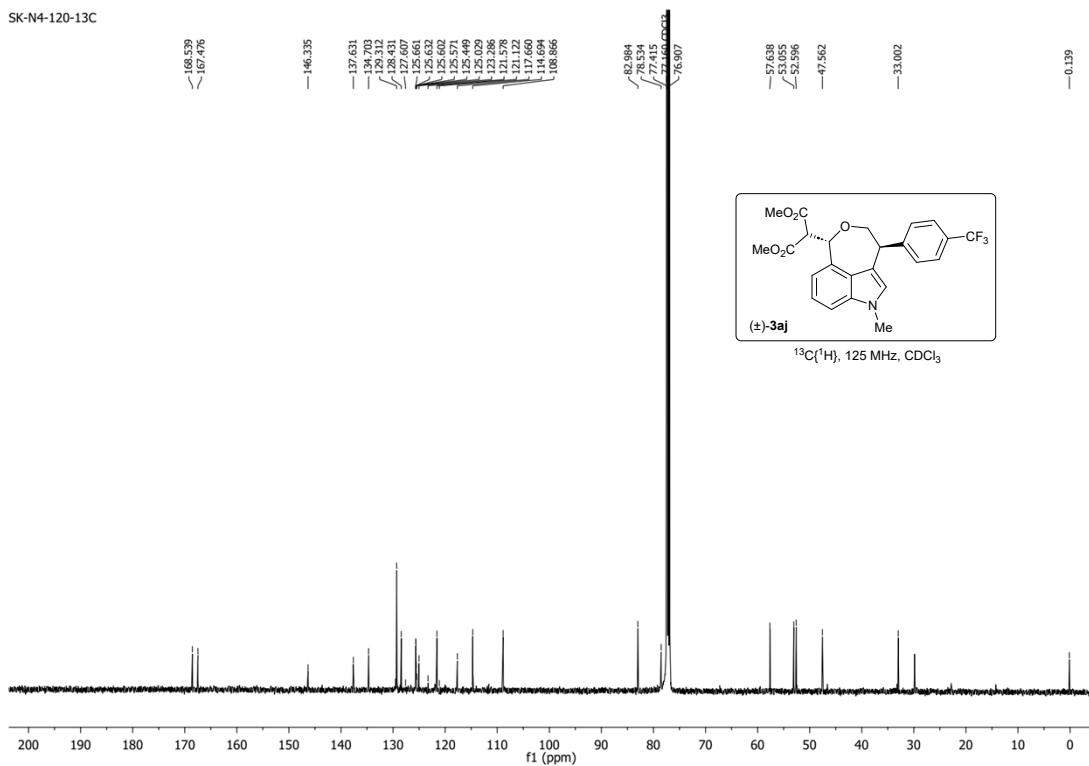

SK-N4-120-19F

—62.390

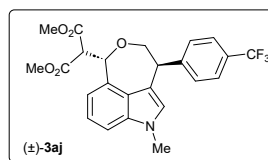

<sup>19</sup>F (470 MHz, CDCl<sub>3</sub>)

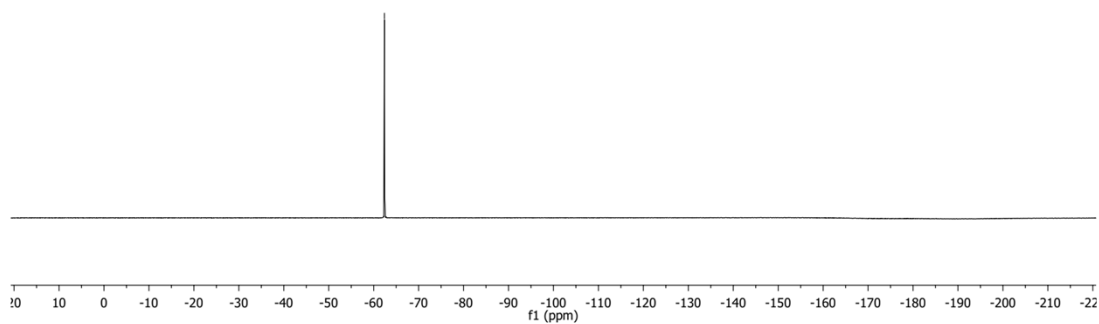

SK-N4-76-1H

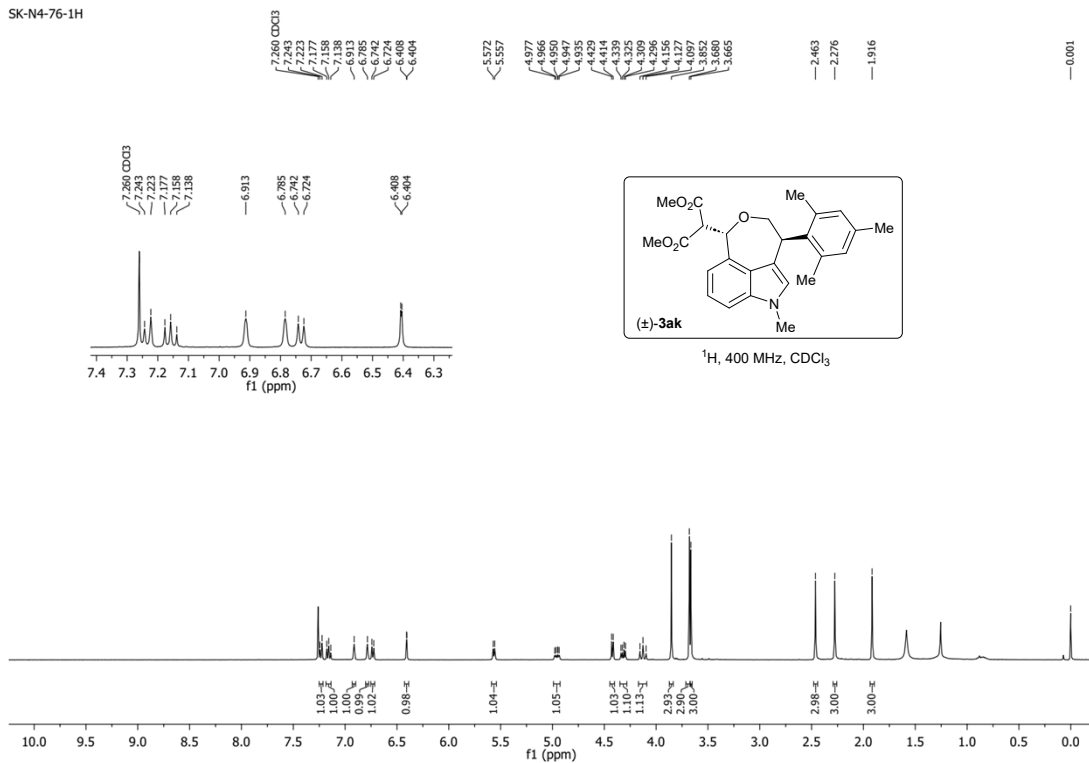

SK-N4-76-13C

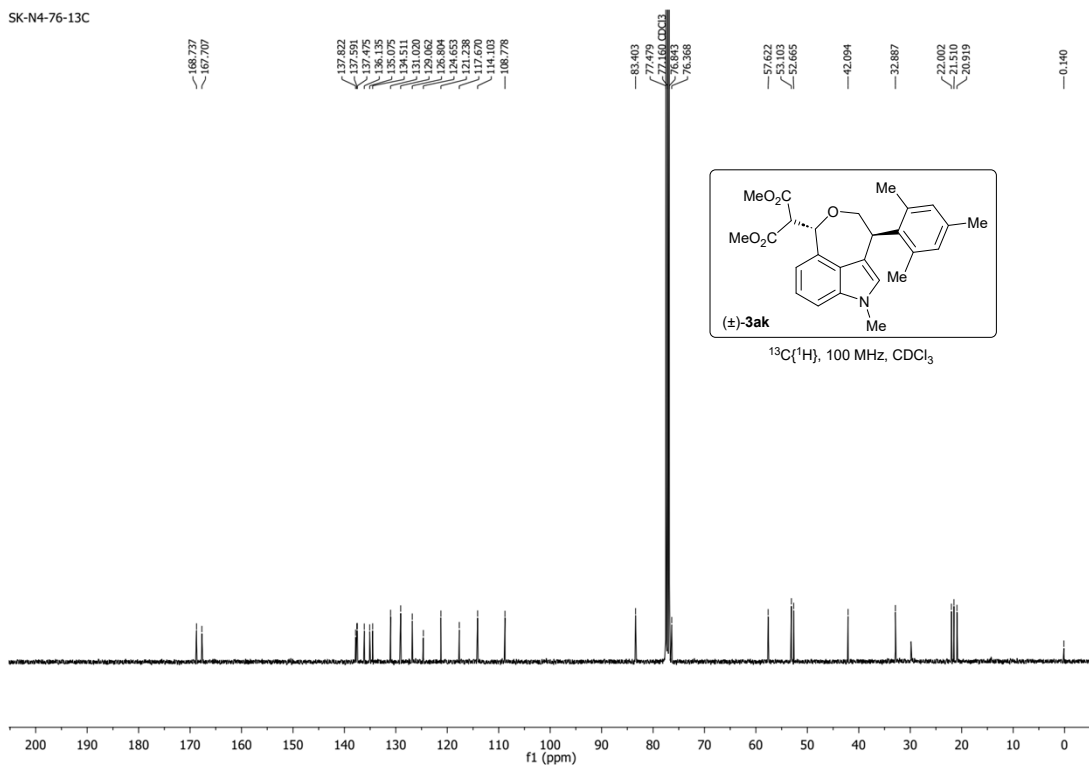

SK-N4-81-1H

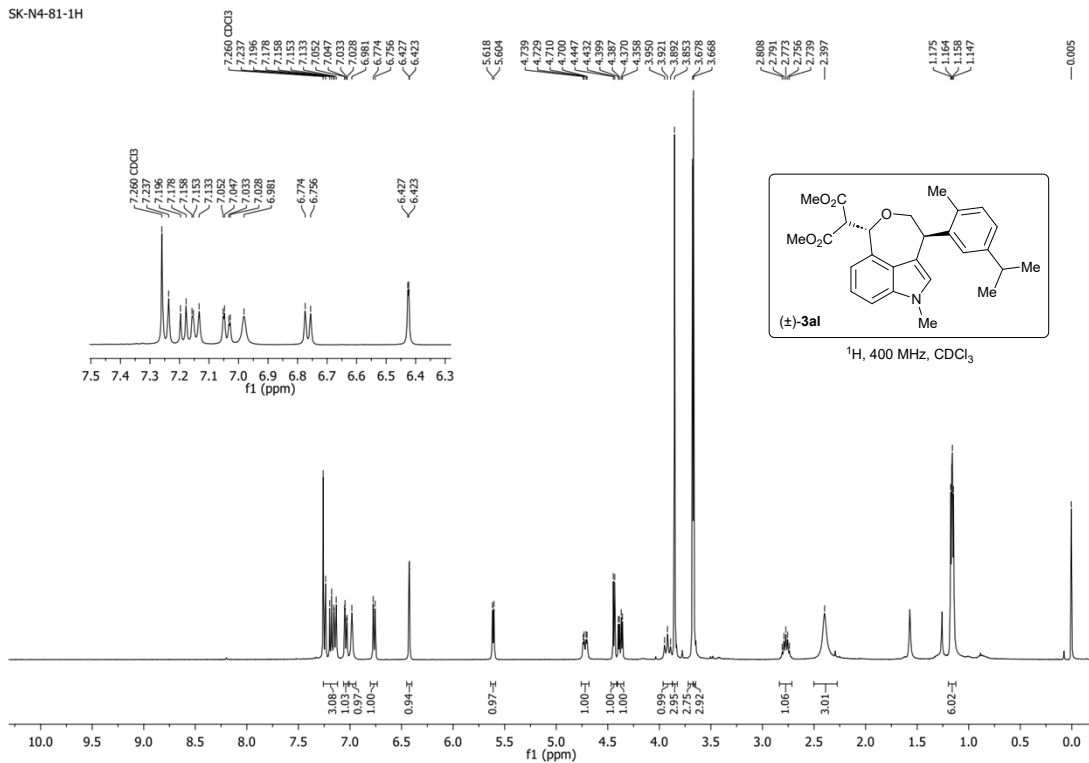

SK-N4-81-13C

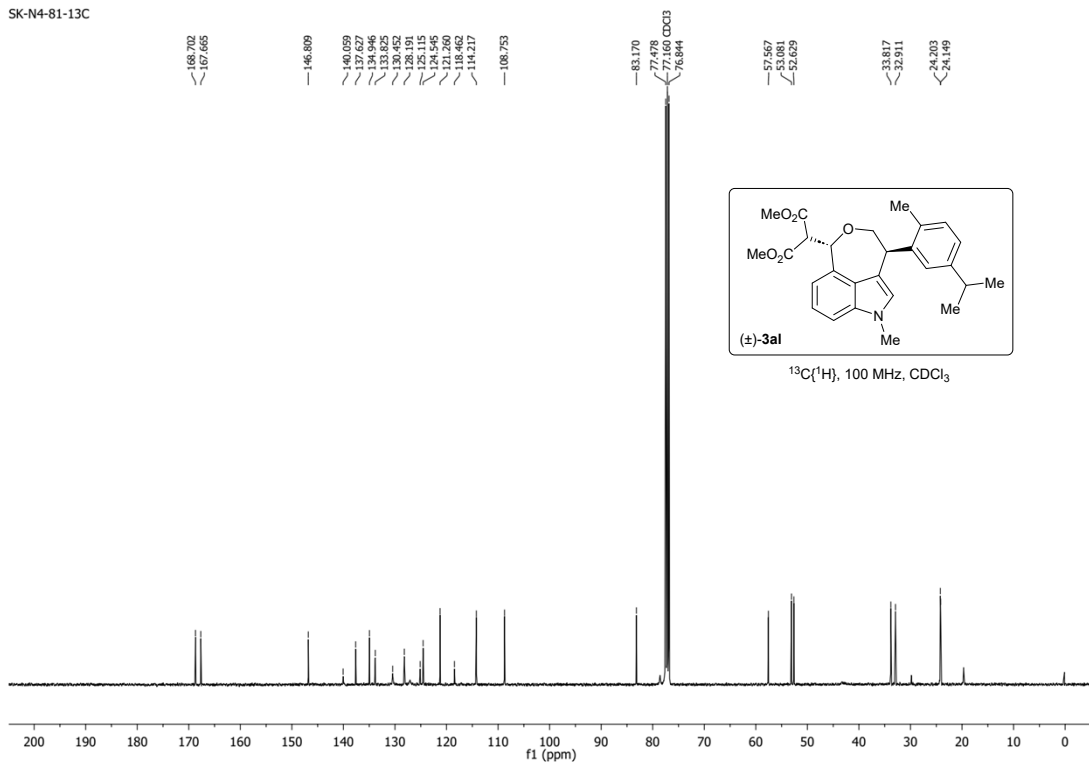

SK-N4-105-1H

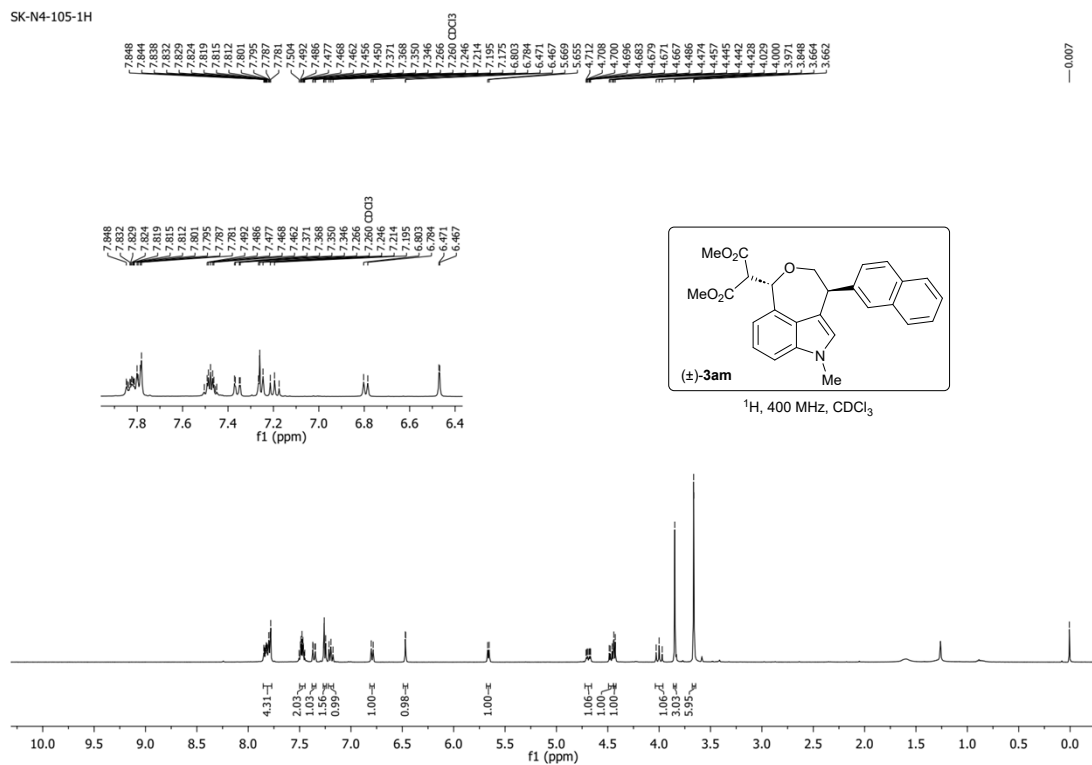

SK-N4-105-13C

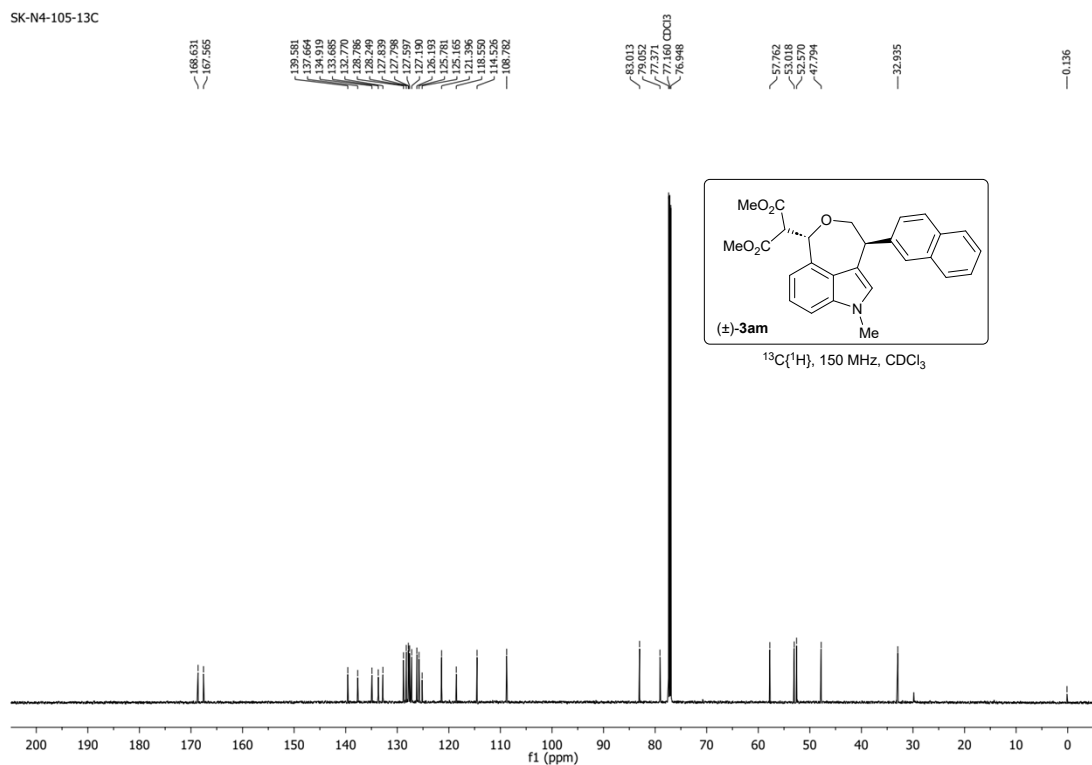

SK-N4-206-1H

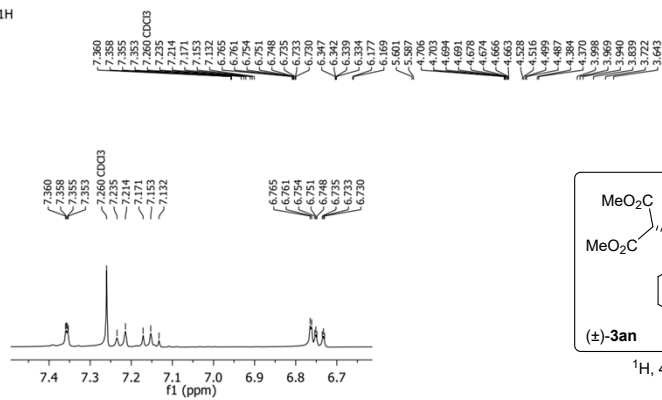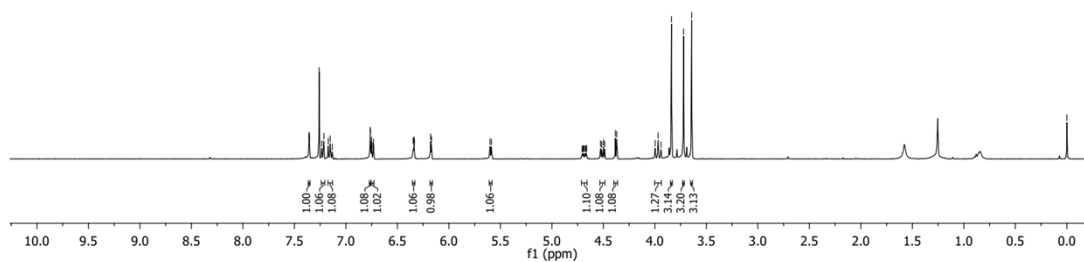

SK-N4-206-13C

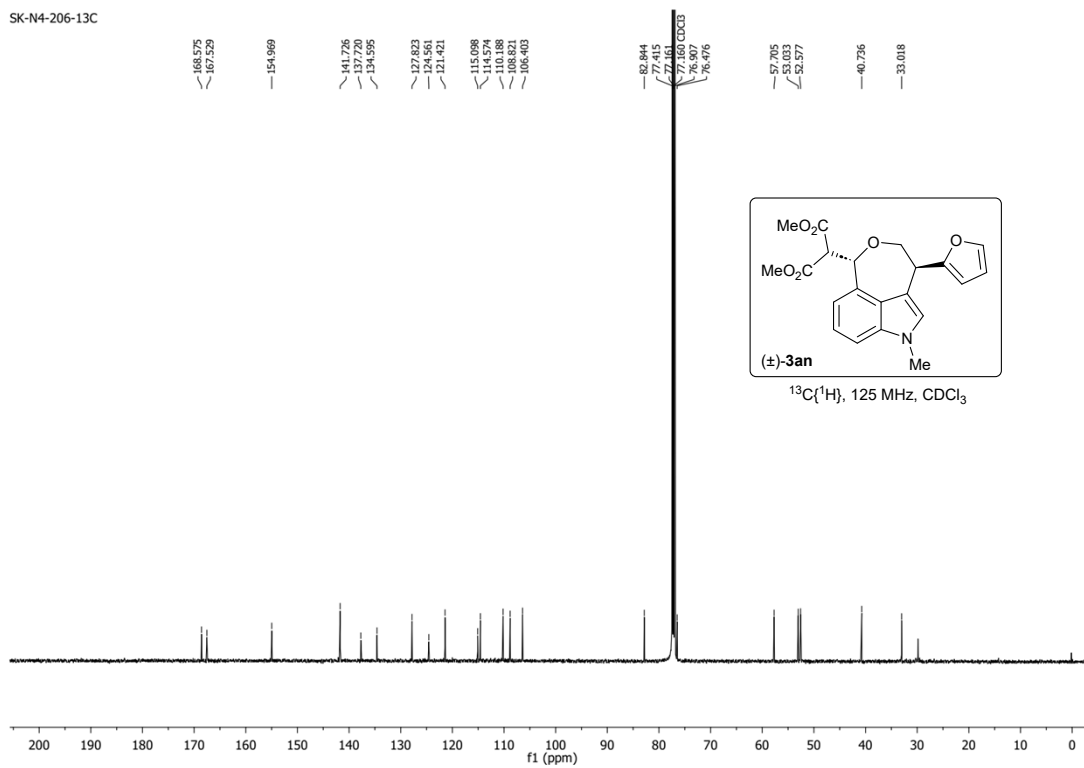

SK-N4-129-1H

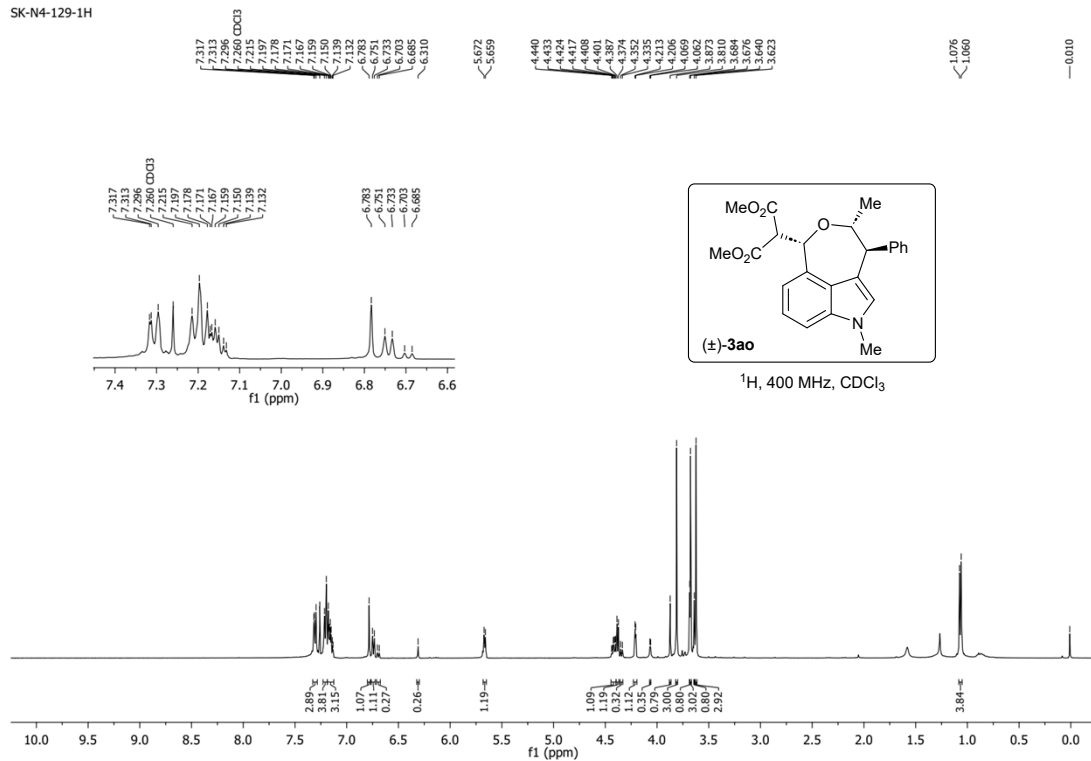

SK-N4-129-13C

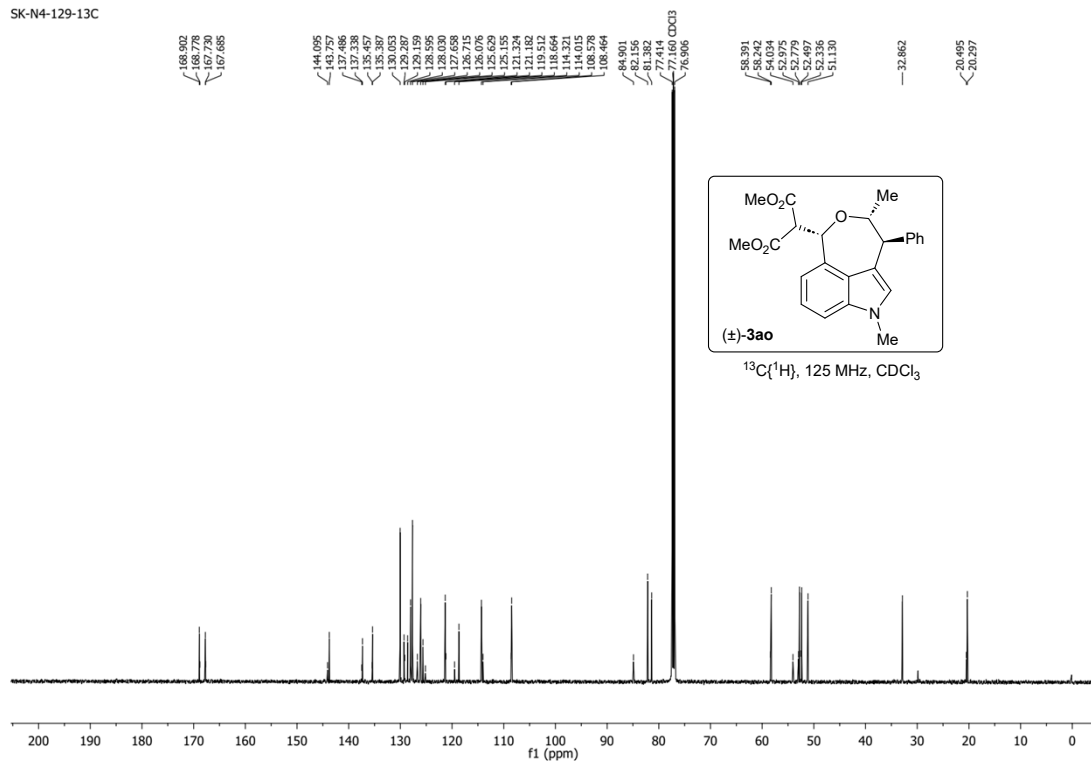

SK-N4-139-1H

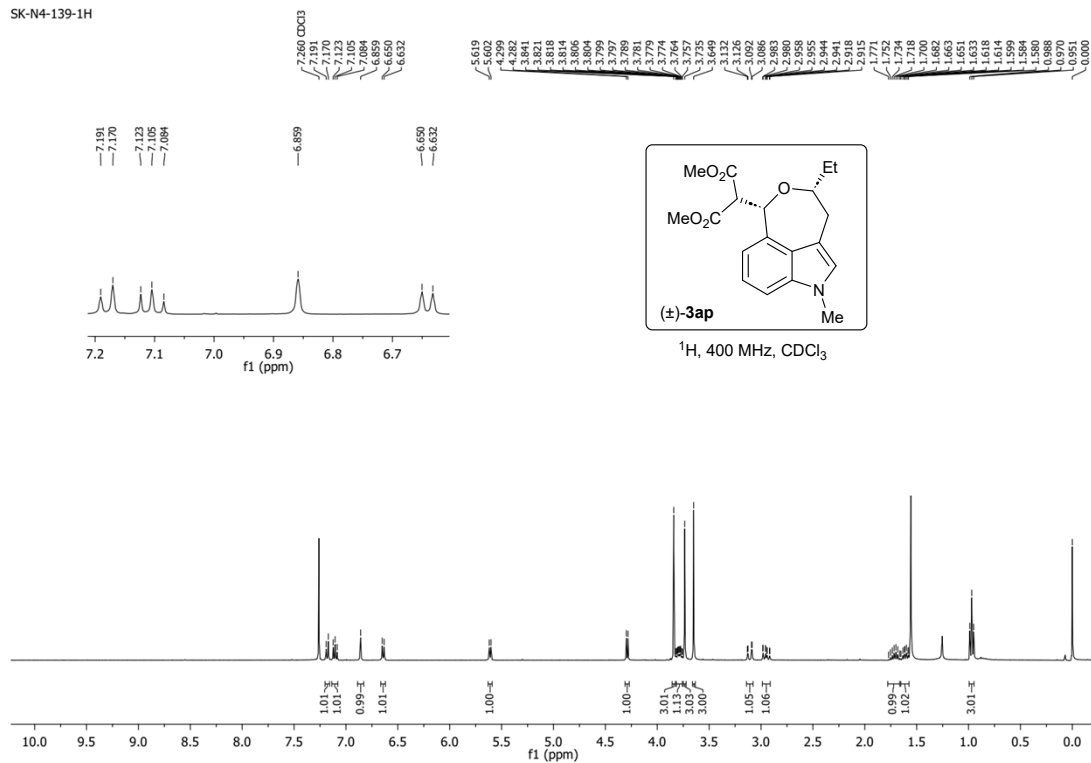

SK-N4-139-13C

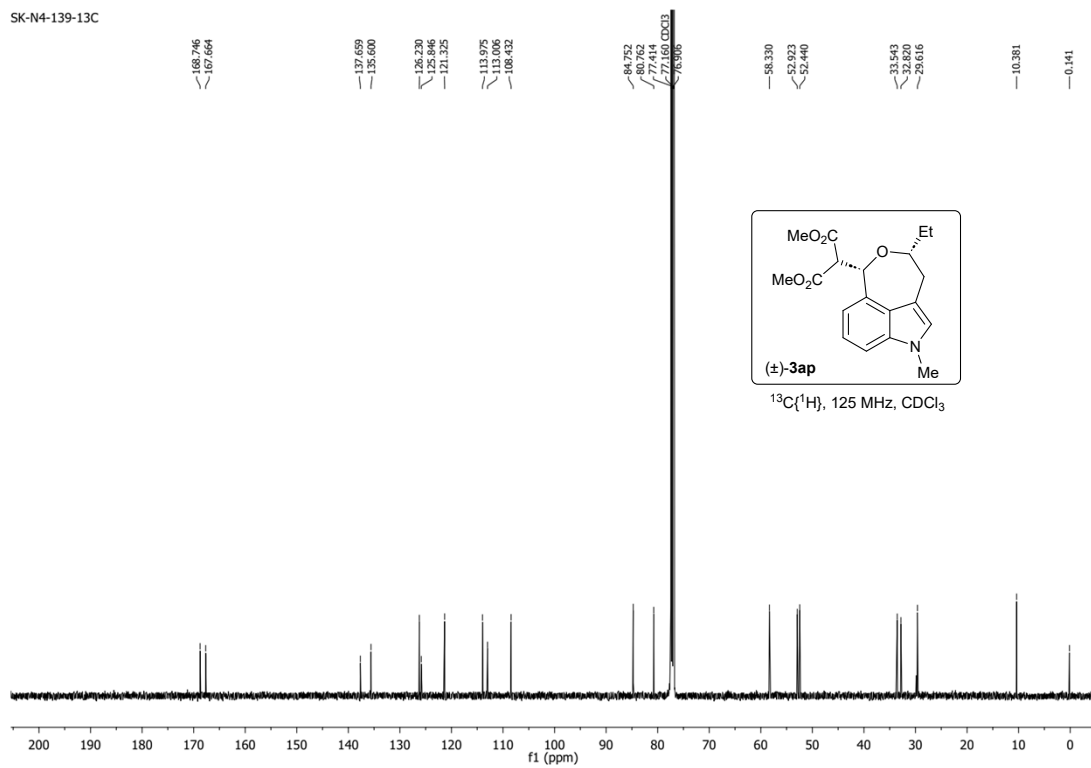

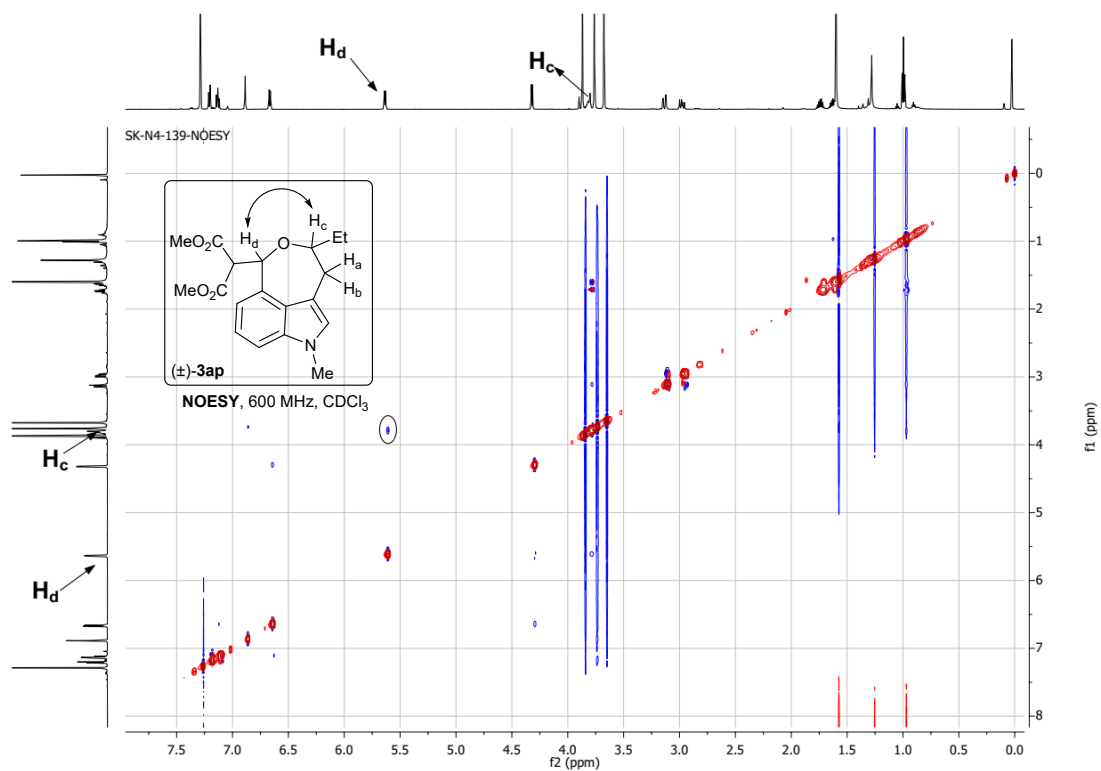

The figure displays the  $^1\text{H}$  NMR spectrum of compound **3ba\*** in  $\text{CDCl}_3$ . The spectrum shows peaks in the aromatic region (6.5–7.4 ppm) and a reference peak at 0.003 ppm. The chemical structure of **3ba\*** is shown, featuring a benzimidazole core with an ethyl group on the nitrogen, a phenyl group on the chiral carbon, and two methyl ester groups on the adjacent carbon.

**Chemical structure of 3ba\*:**

CCN1C=CC2=C1c3ccccc3C2[C@H](C(=O)OC)[C@@H](C(=O)OC)c4ccccc4

**$^1\text{H}$  NMR spectrum data (ppm):**

- 7.344, 7.341, 7.337, 7.336, 7.333, 7.313, 7.313, 7.306, 7.293, 7.293, 7.288, 7.284, 7.278, 7.276, 7.260, 7.170, 7.170, 7.151, 7.151, 6.757, 6.739, 6.537
- 5.611, 5.596, 4.528, 4.527, 4.517, 4.513, 4.500, 4.496, 4.488, 4.484, 4.413, 4.399, 4.389, 4.360, 4.098, 4.088, 4.083, 4.070, 4.062, 4.052, 4.044, 4.044, 3.894, 3.865, 3.837, 3.659
- 1.387, 1.369, 1.351
- 0.003

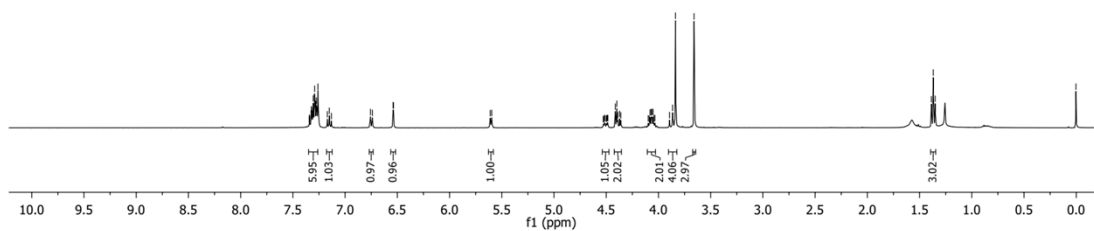

SK-N4-48-13C

169.656  
167.589

140.223

136.643  
134.961

129.020  
128.617  
128.485  
128.096  
125.304  
121.159  
118.577  
114.367

108.805

83.002  
79.290  
77.413  
77.160 CDCl<sub>3</sub>  
76.906

57.670  
57.013  
52.572  
47.803

41.052

15.539

-0.138

**3ba'**

<sup>13</sup>C{<sup>1</sup>H}, 125 MHz, CDCl<sub>3</sub>

COC(=O)[C@H]1Cc2ccc3c(c2)c(c[nH]3)C[C@@H](C1C(=O)OC)Cc1ccccc1

SK-N4-36-1H

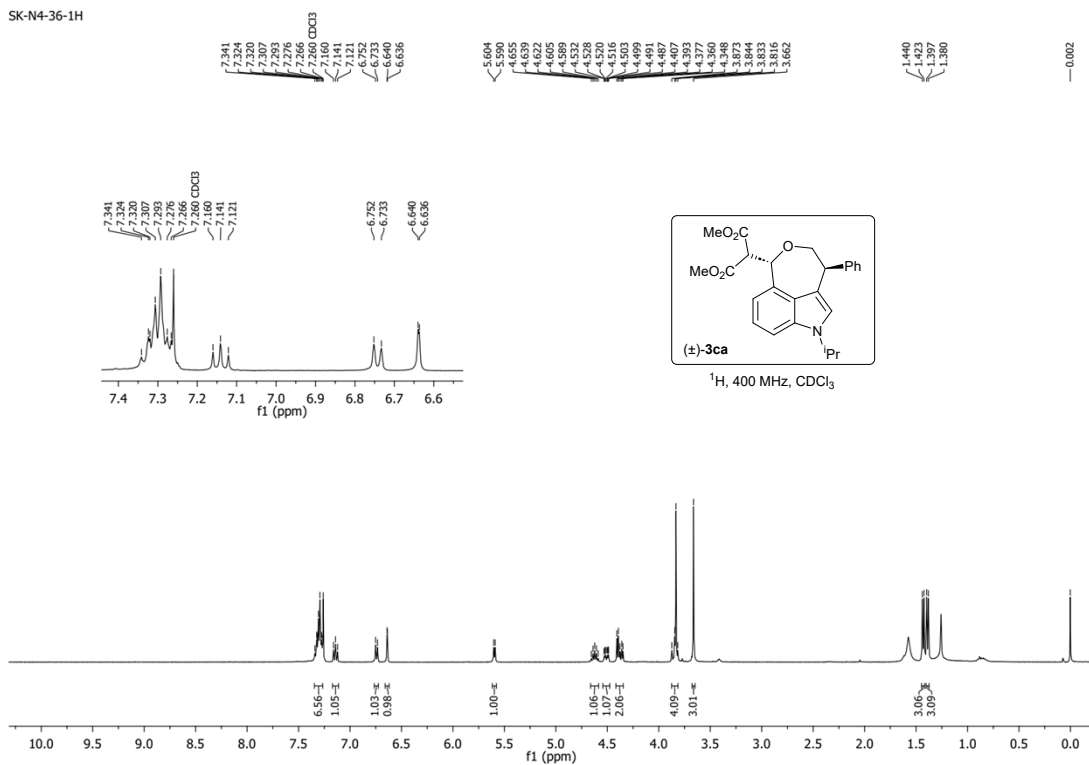

SK-N4-36-13C

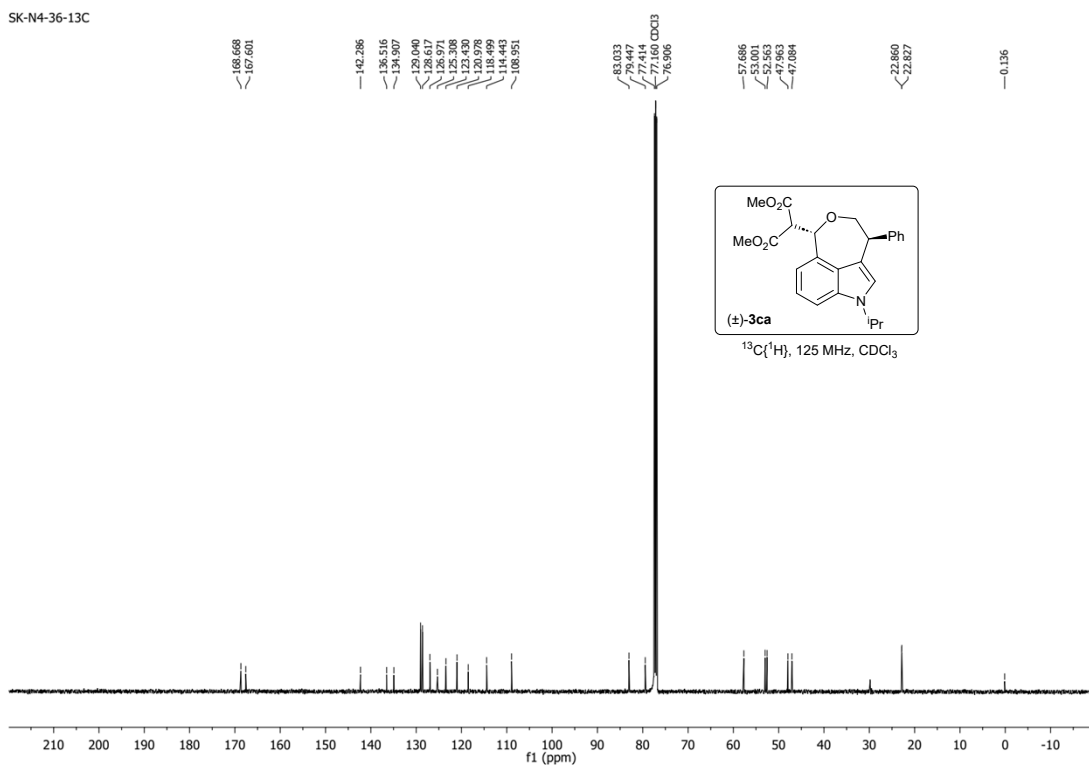

SK-N4-51-1H

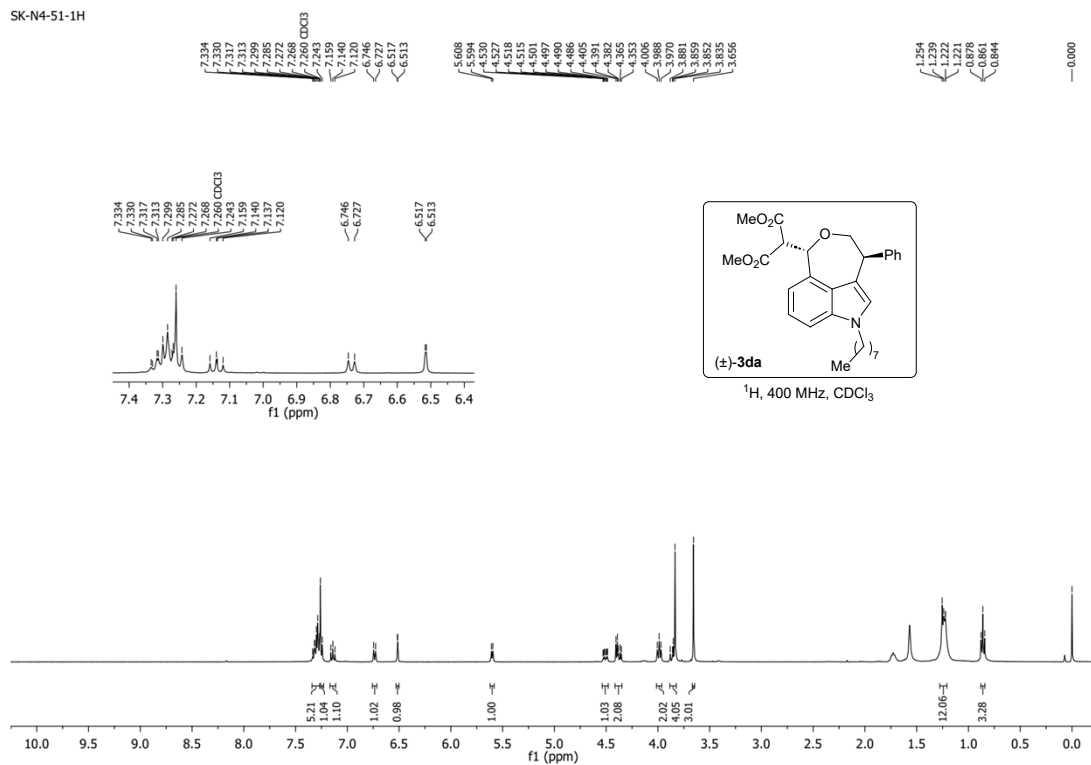

SK-N4-51-13C

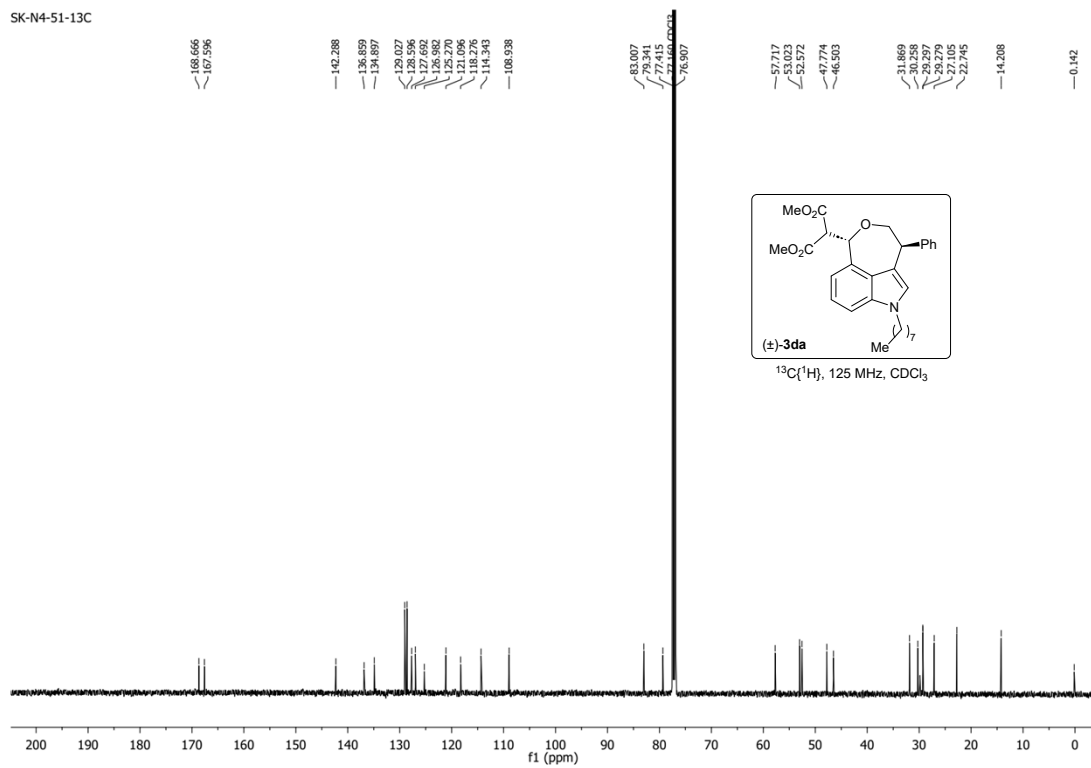

SK-N4-34-1H

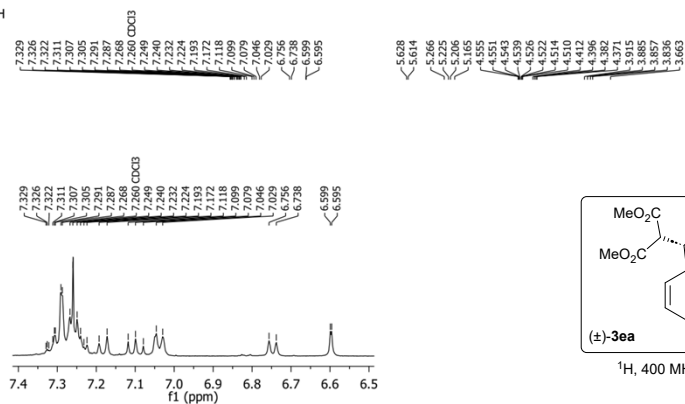

—0.001

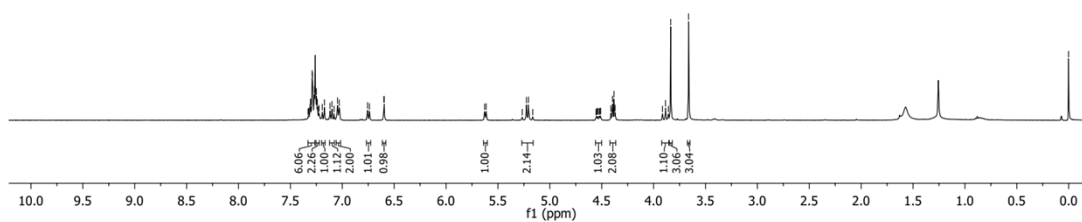

SK-N4-34-13C

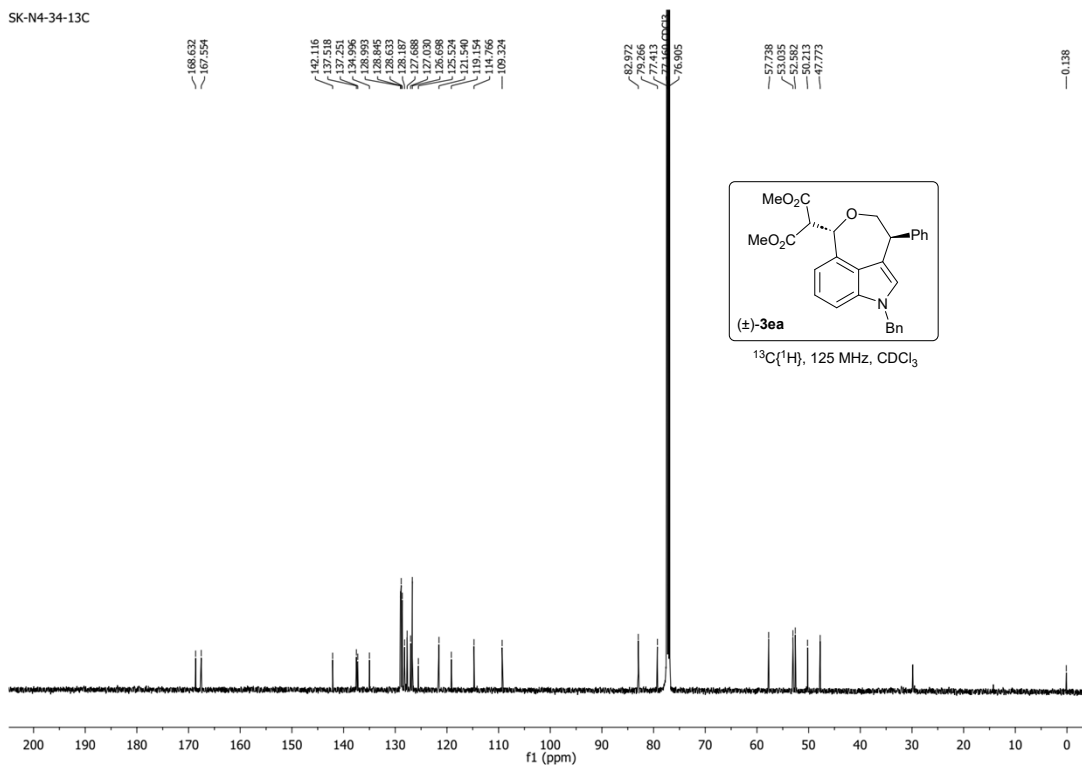

—0.138

SK-N4-50-1H

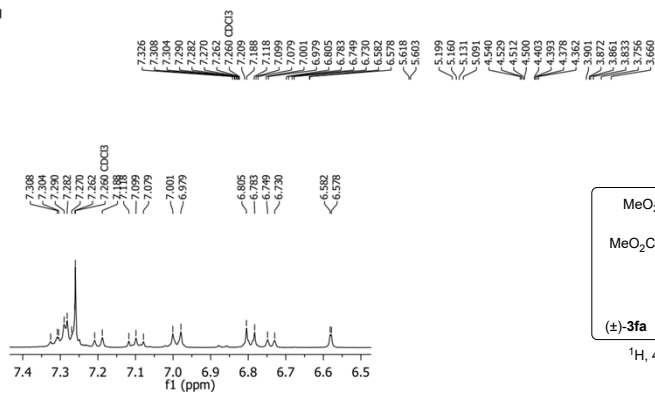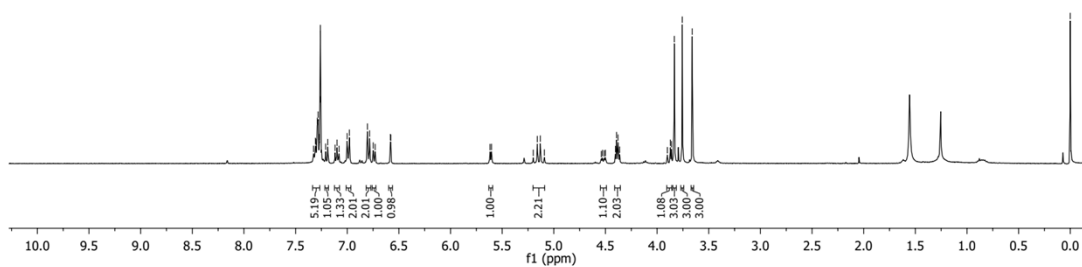

SK-N4-50-13C

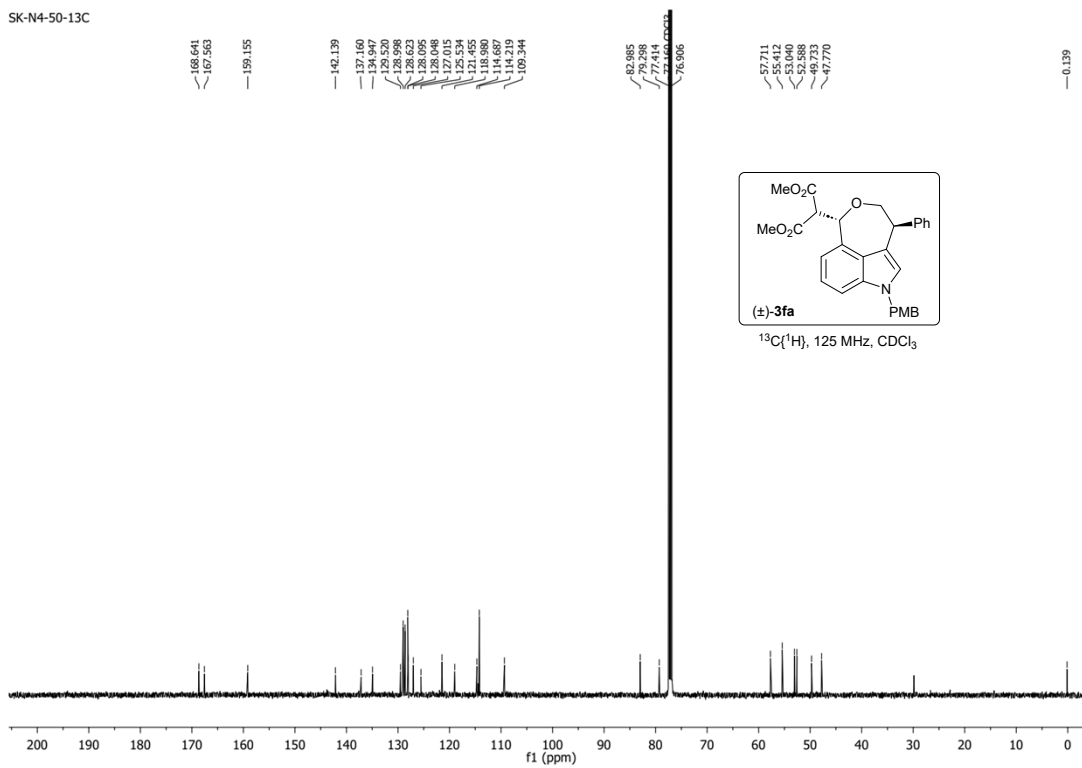

SK-N4-71-1H

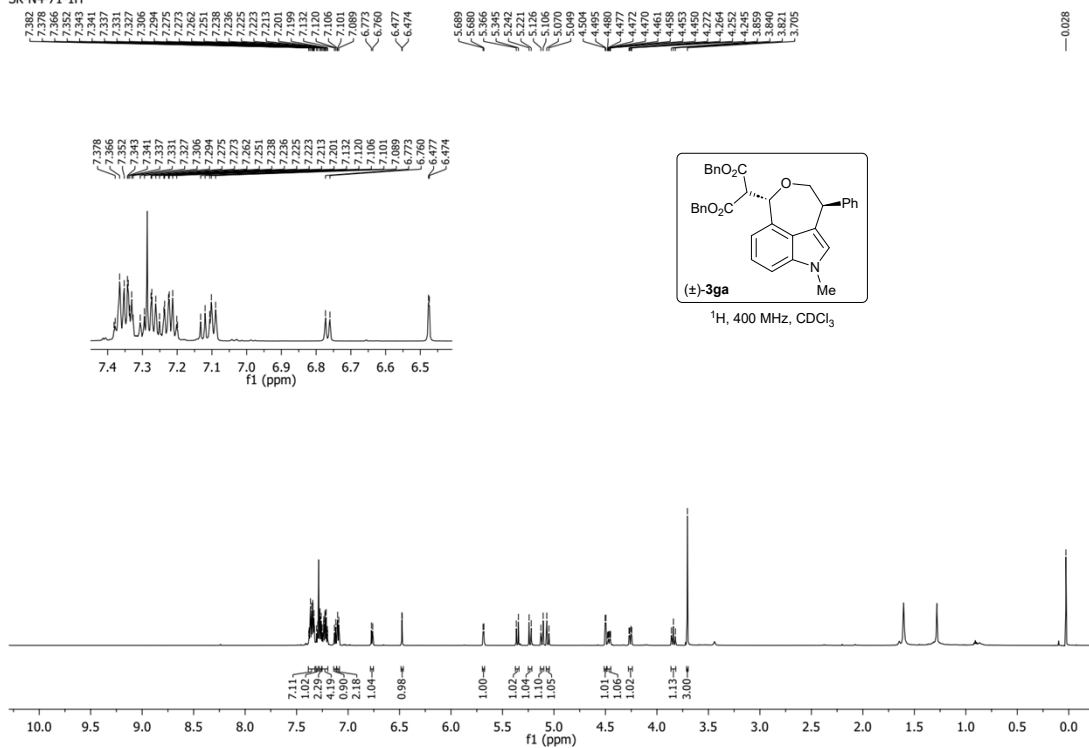

SK-N4-71-13C

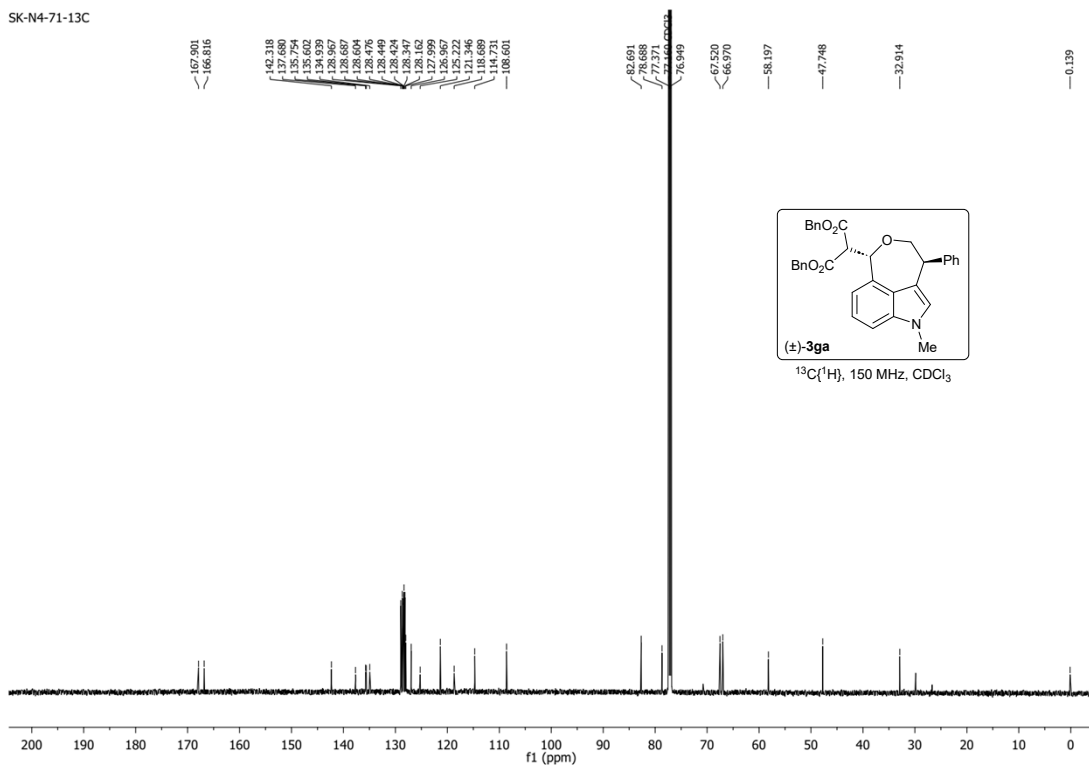

SK-N4-33-1H

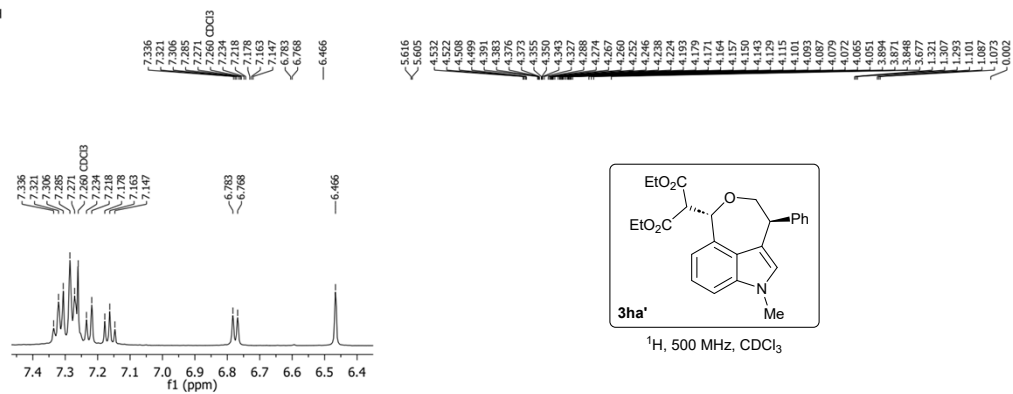

SK-N4-33-13C

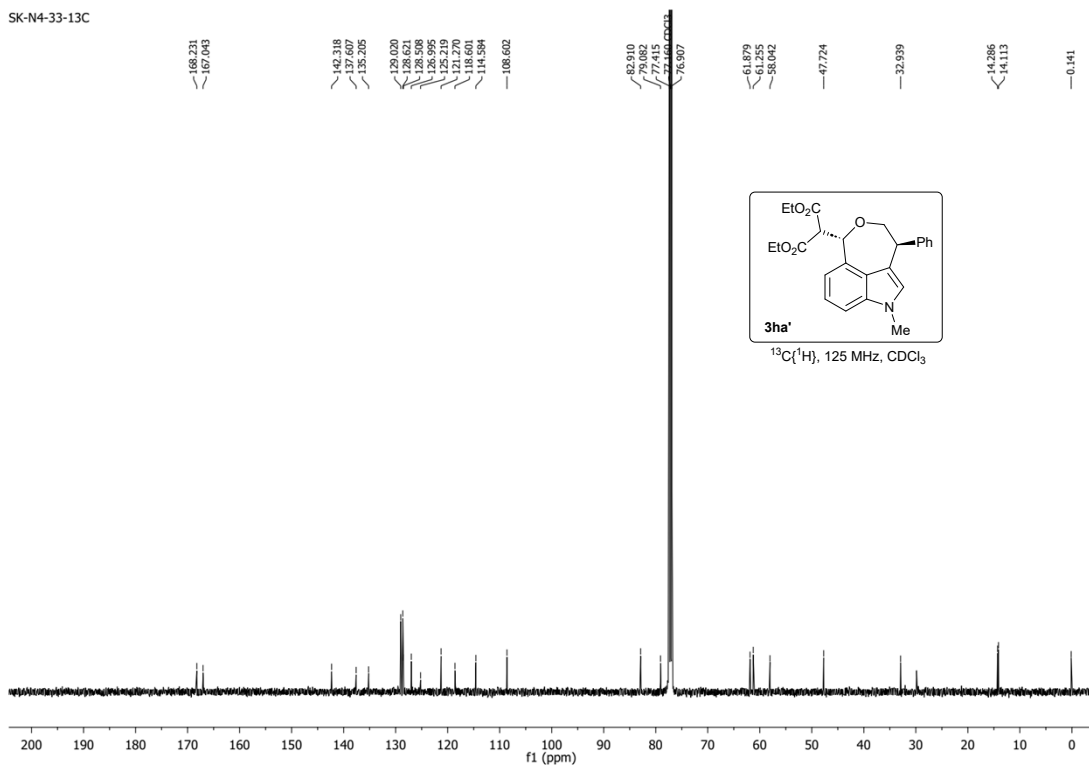

SK-N4-45-1H

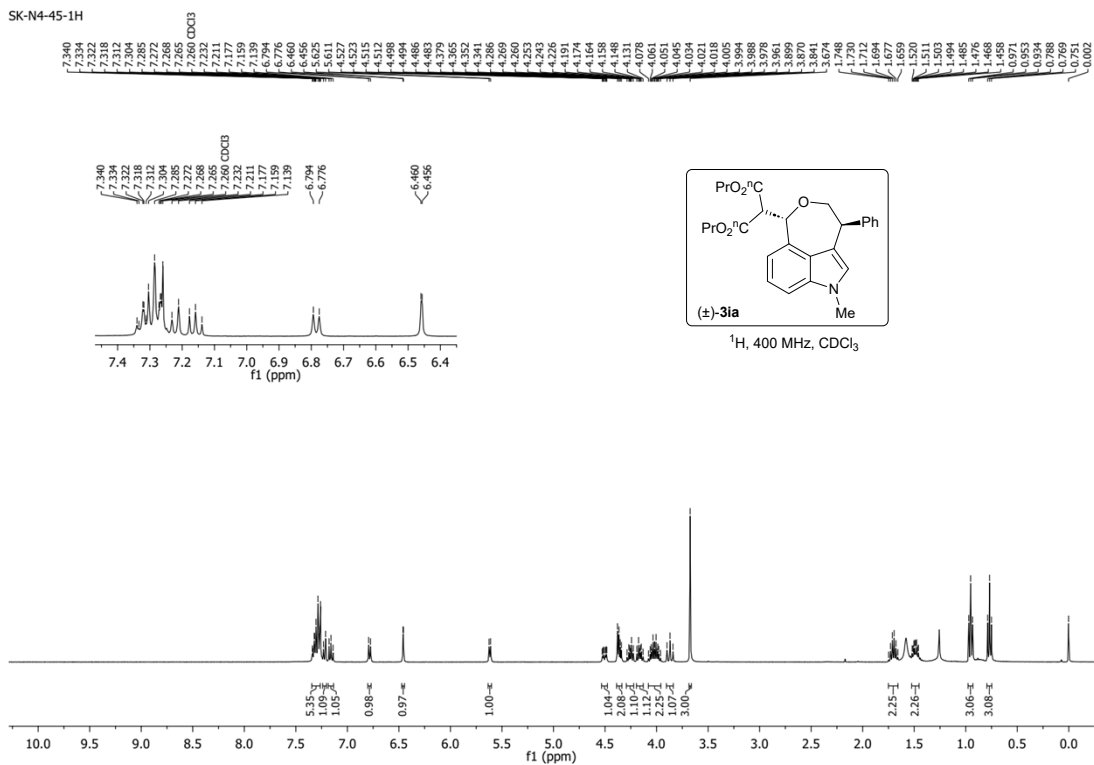

SK-N4-45-13C

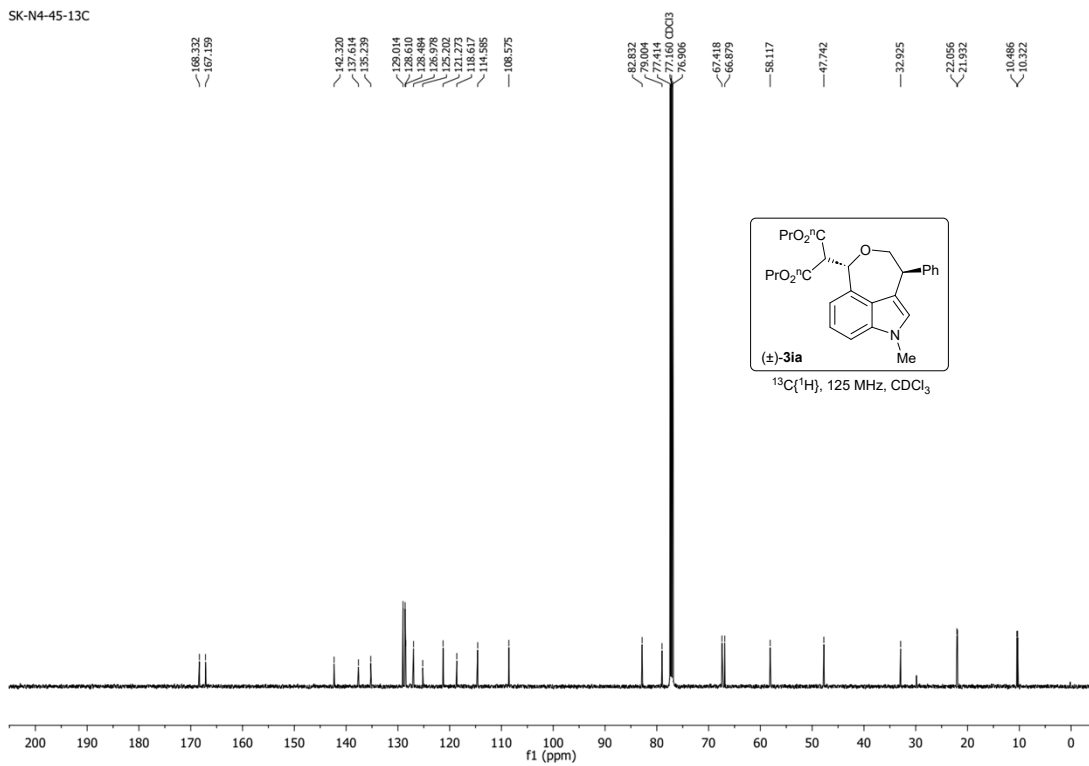

SK-N4-79-1H

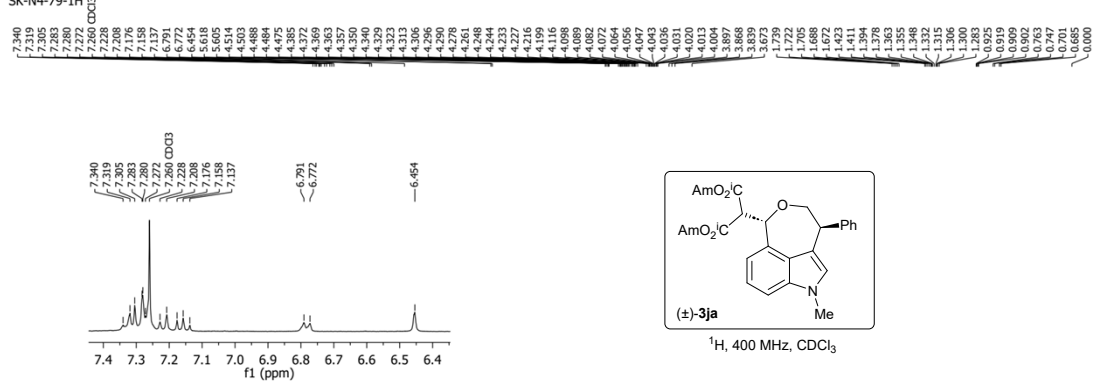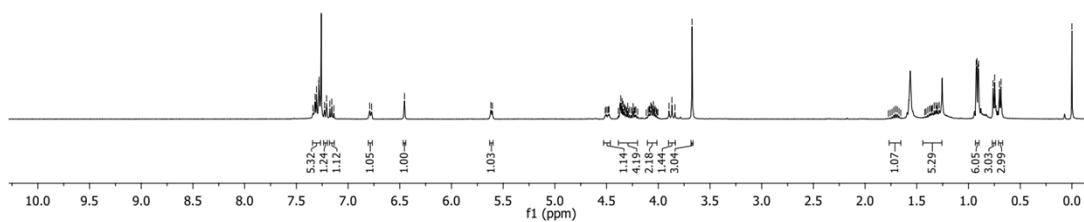

SK-N4-59-1H

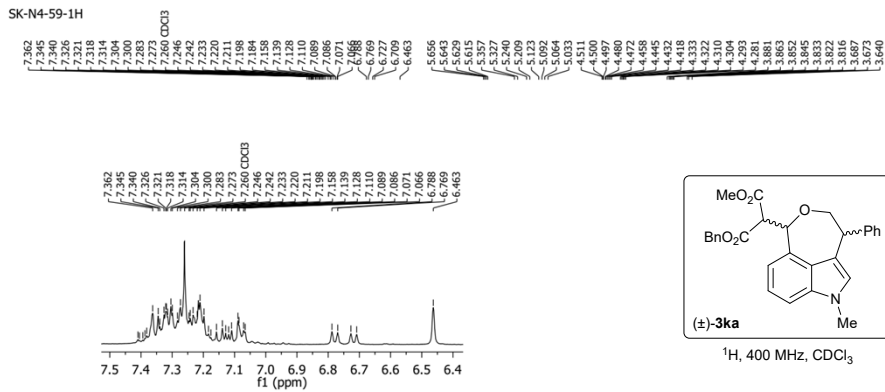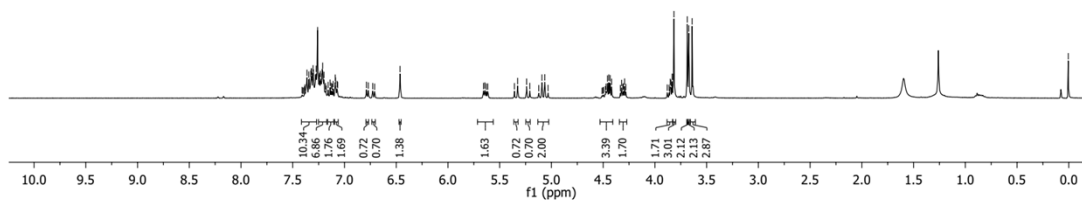

SK-N4-59-13C

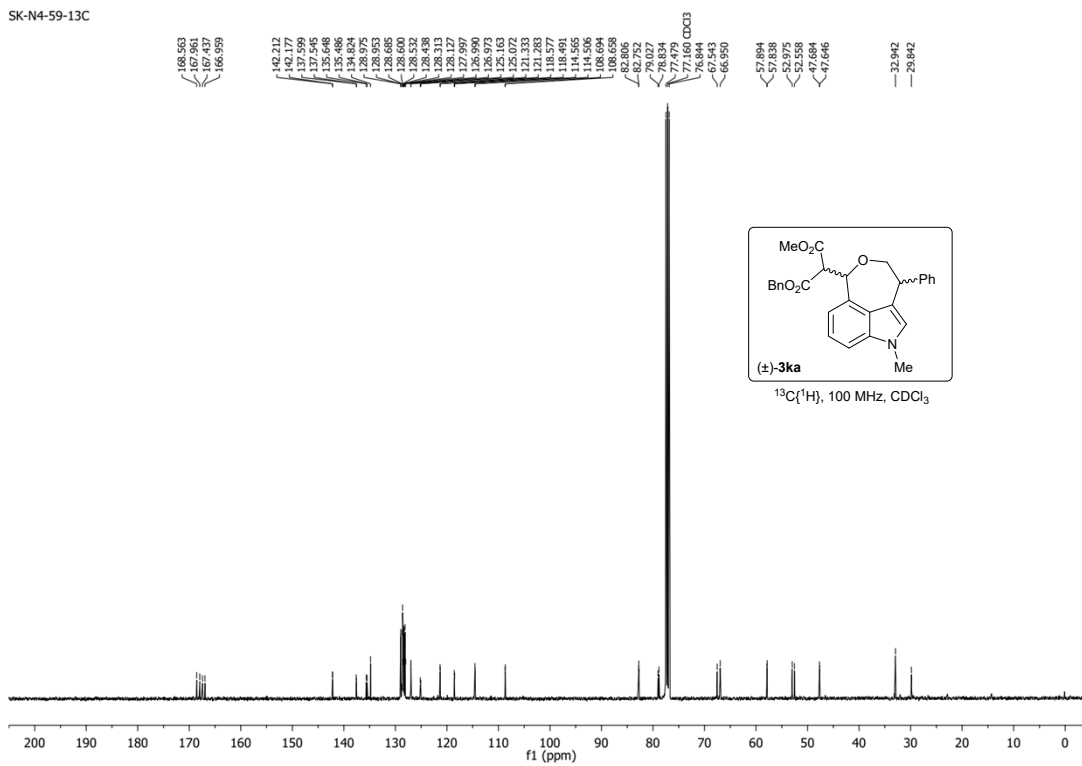

SK-N4-138-1H

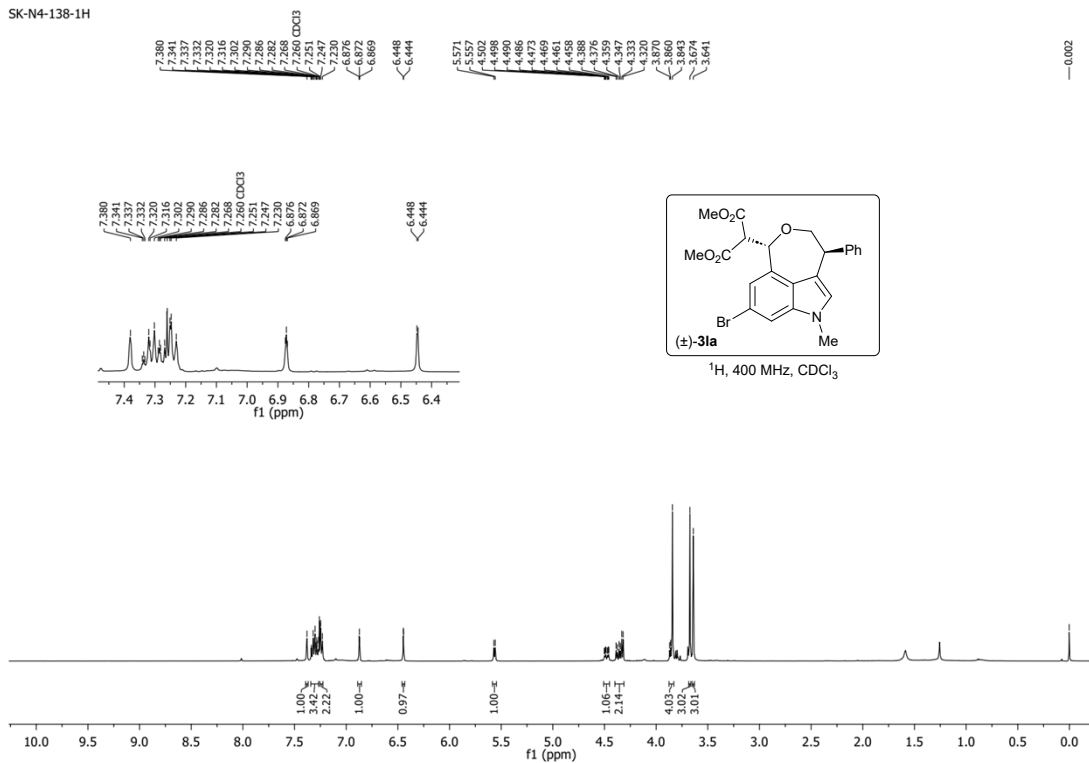

SK-N4-138-13C

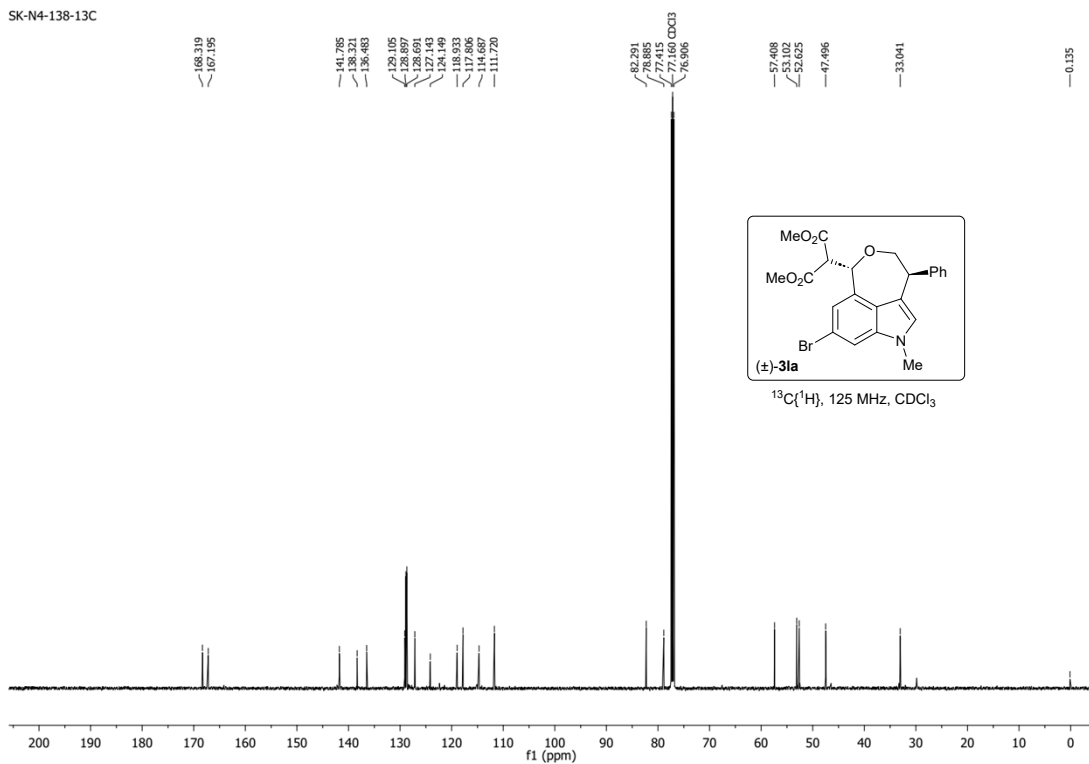

SK-N4-189-1H

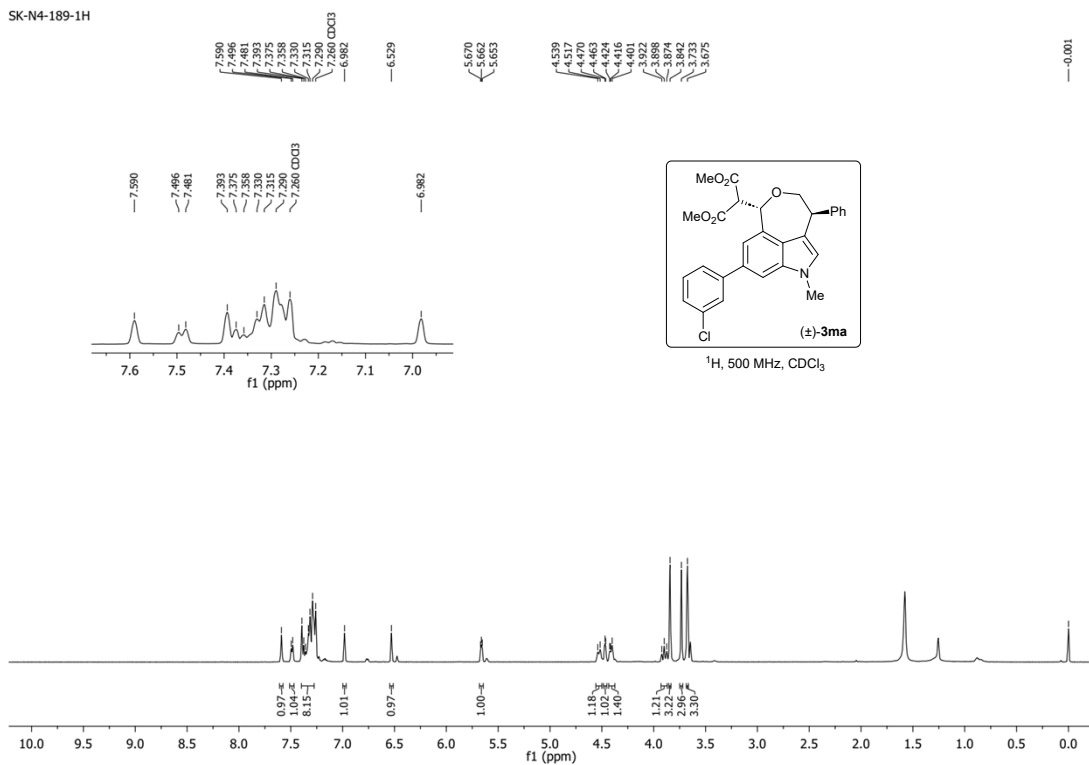

SK-N4-189-13C

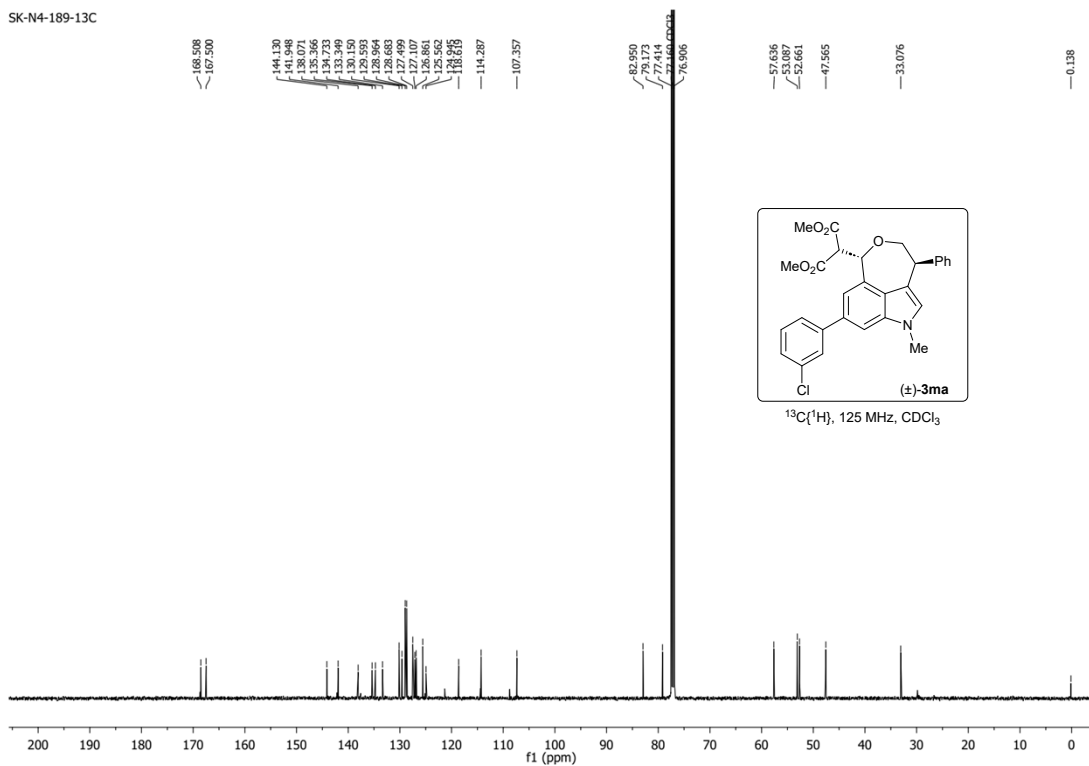

SK-N4-141-1H

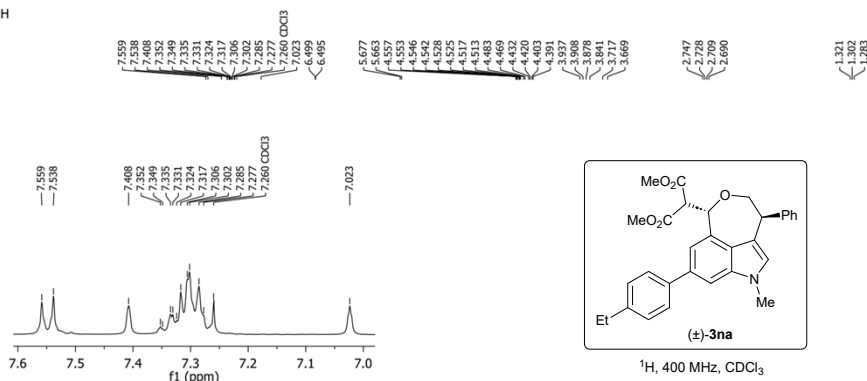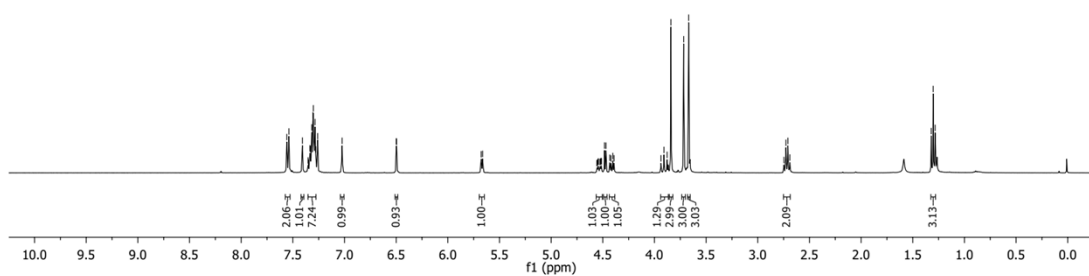

SK-N4-141-13C

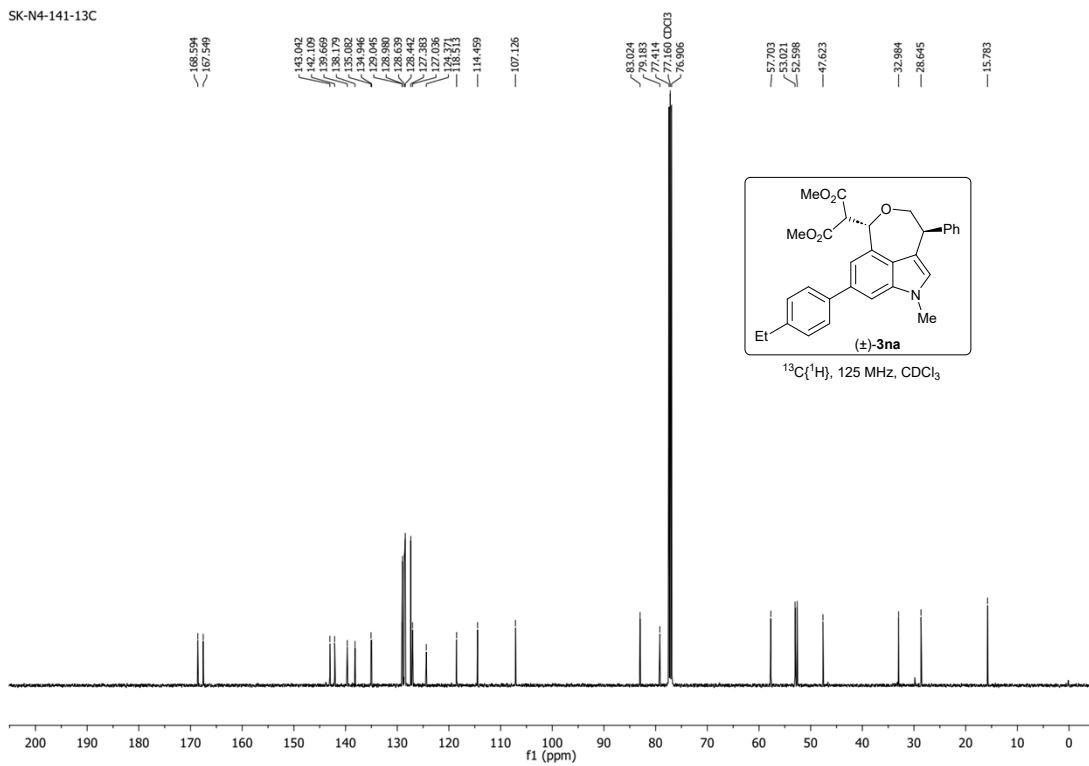

SK-N4-207-500-1H

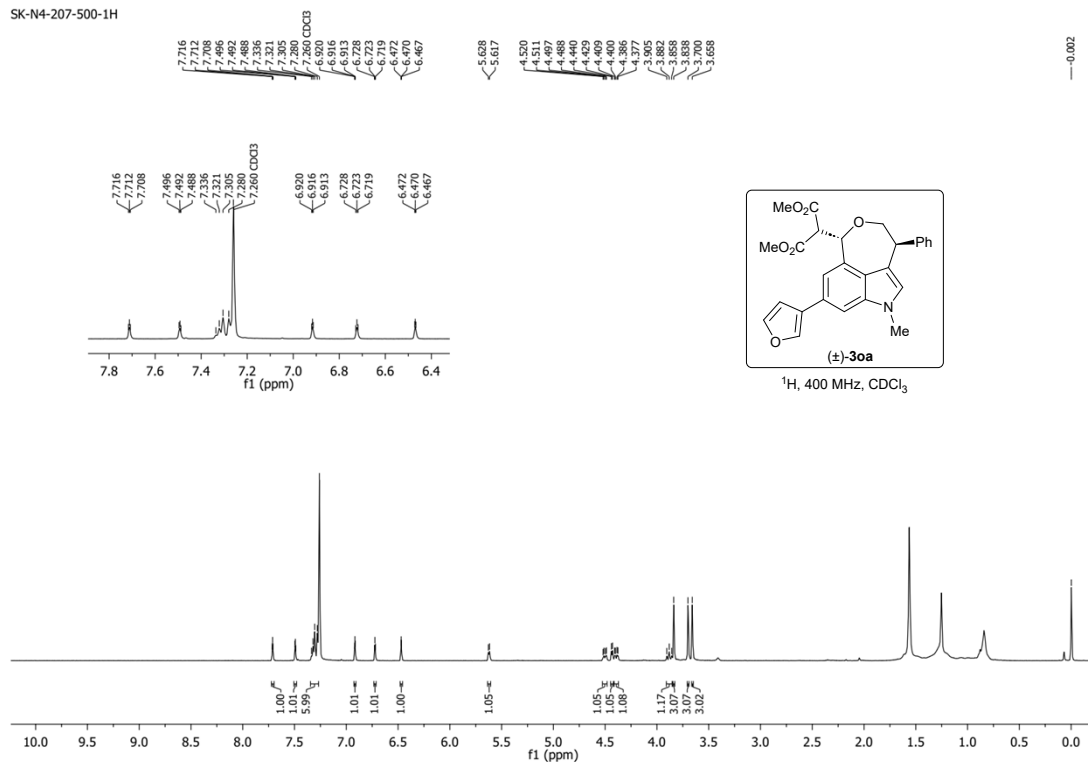

SK-N4-207-R-13C

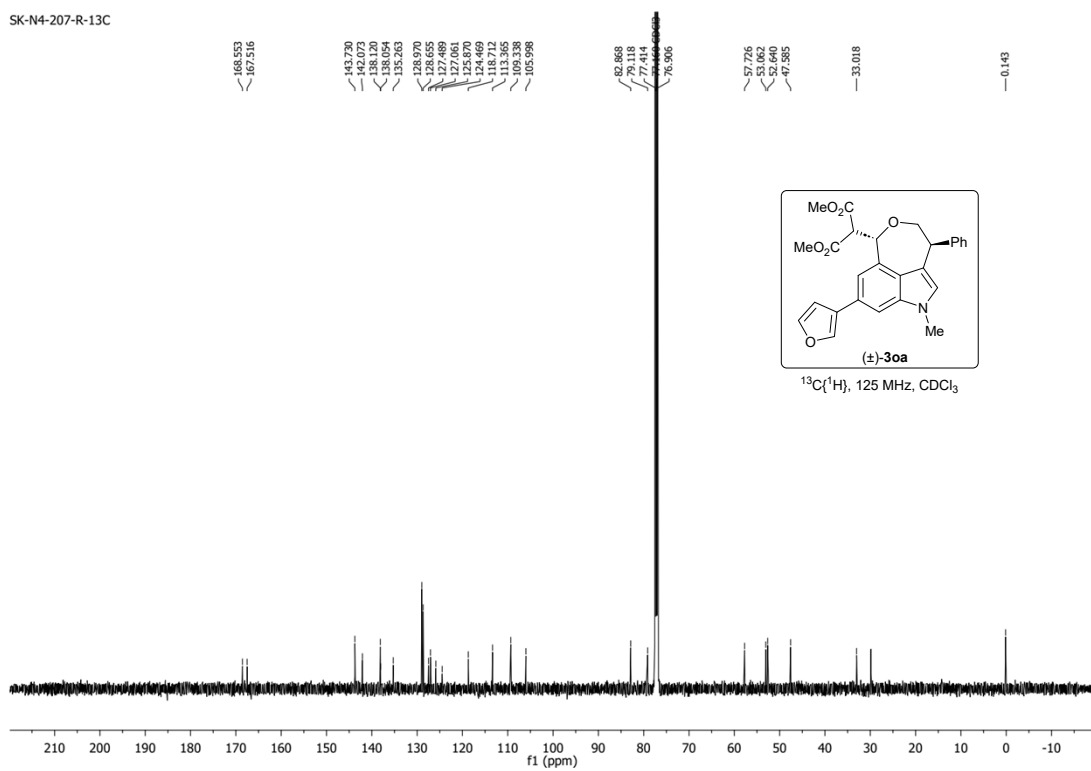

SK-N4-133-1H

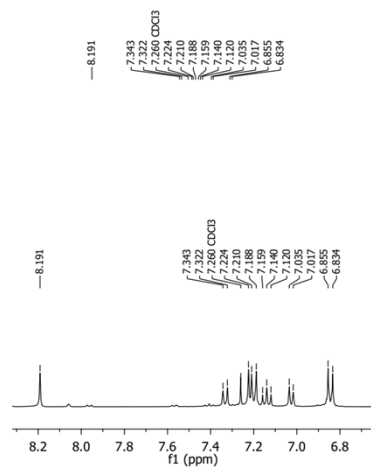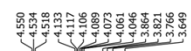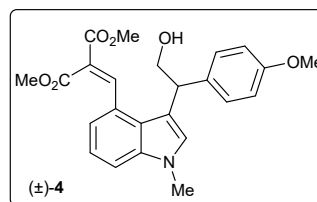

$^1\text{H}$ , 400 MHz,  $\text{CDCl}_3$

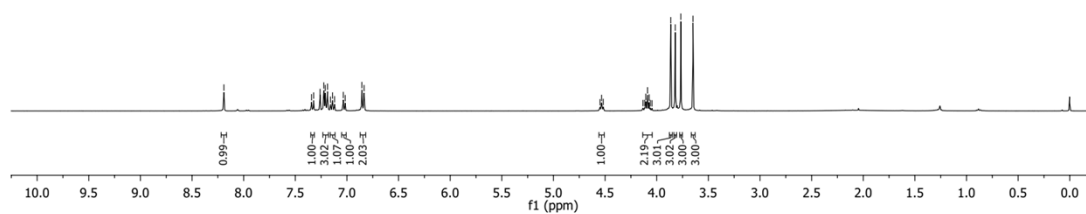

SK-N4-133-13C

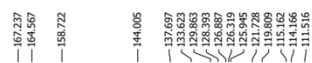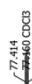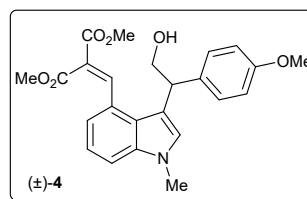

$^{13}\text{C}\{^1\text{H}\}$ , 125 MHz,  $\text{CDCl}_3$

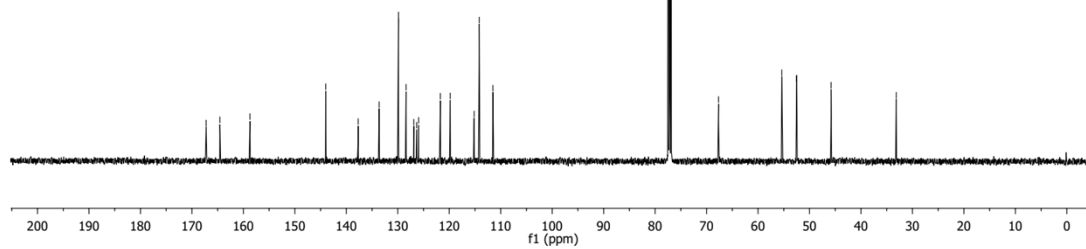

SK-N4-145-1H

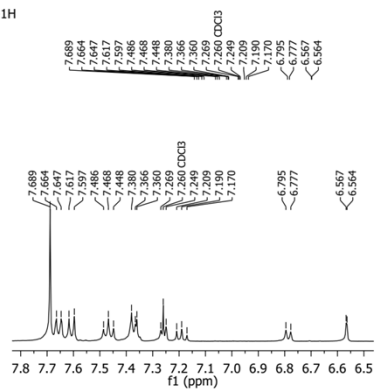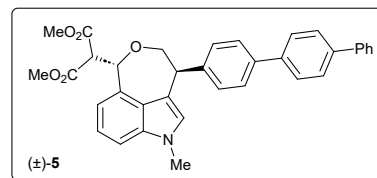

$^1\text{H}$ , 400 MHz,  $\text{CDCl}_3$

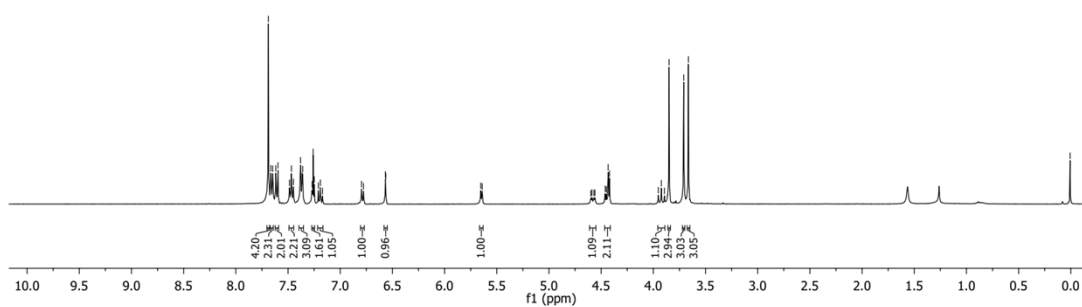

SK-N4-145-13C

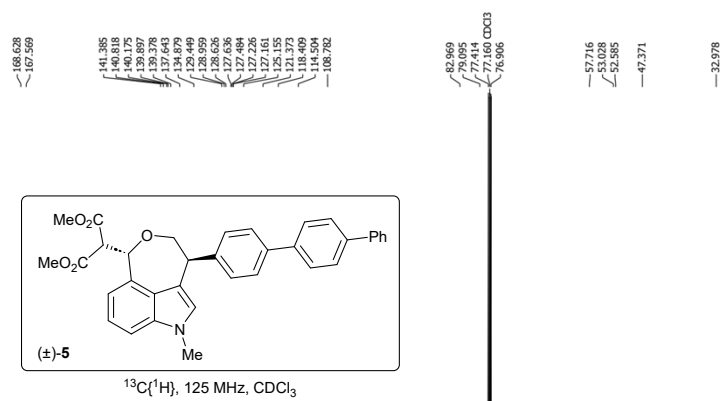

$^{13}\text{C}\{^1\text{H}\}$ , 125 MHz,  $\text{CDCl}_3$

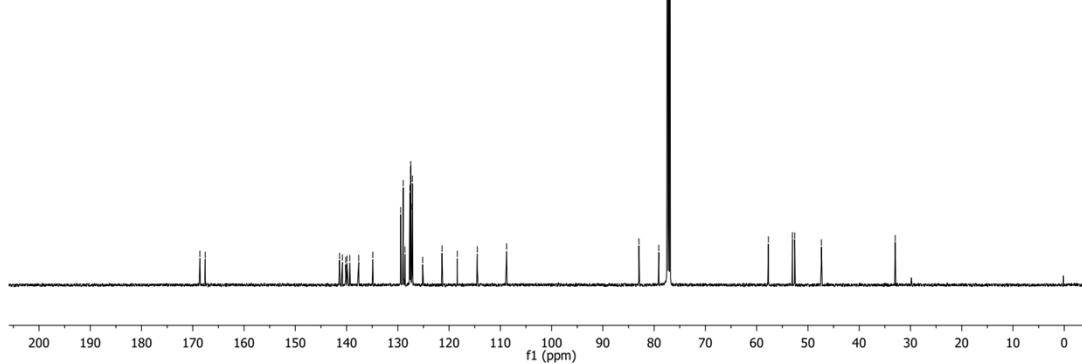

SK-N4-155-1H

7.842, 7.839, 7.832, 7.822, 7.812, 7.782, 7.768, 7.764, 7.762, 7.662, 7.541, 7.365, 7.355, 7.353, 7.353, 7.347, 7.342, 7.342, 7.335, 7.335, 7.332, 7.327, 7.327, 7.327, 7.321, 7.321, 7.313, 7.309, 7.260 CDCl<sub>3</sub>, 7.206, 7.187, 7.167, 6.791, 6.773, 6.773, 6.539, 6.539, 6.544, 6.530

7.842, 7.822, 7.786, 7.768, 7.764, 7.662, 7.541, 7.365, 7.355, 7.353, 7.347, 7.342, 7.342, 7.335, 7.335, 7.332, 7.327, 7.327, 7.327, 7.321, 7.321, 7.313, 7.309, 7.260 CDCl<sub>3</sub>, 7.206, 7.187, 7.167, 6.791, 6.773, 6.773, 6.543, 6.539

f1 (ppm)

CN1C=CC2=C1C(=C(C=C2)OC(=O)C)OC(=O)C[C@H]3C=C(C=C3)C4=CC=C(C=C4)C5=CC6=C(C=C5)SC6=C5

(±)-6

<sup>1</sup>H, 400 MHz, CDCl<sub>3</sub>

— 0.001

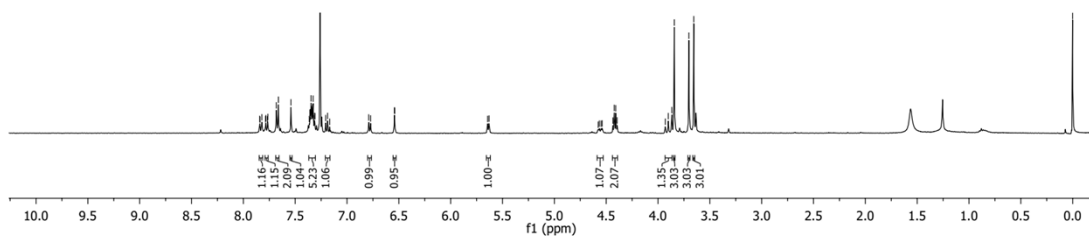

SK-N4-155-13C

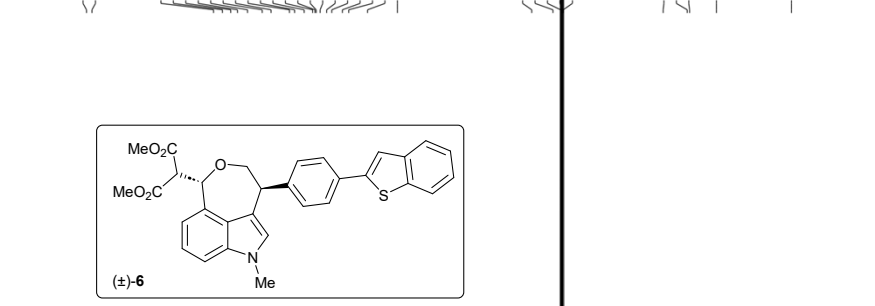CN1C=CC2=C1c3ccccc3OC2(C(=O)OC)C(=O)OC  
(±)-**6**  
 $^{13}\text{C}\{^1\text{H}\}$ , 125 MHz,  $\text{CDCl}_3$

168.617  
167.557  
144.172  
142.461  
140.876  
139.876  
137.638  
134.820  
133.114  
128.522  
128.593  
126.748  
125.104  
121.490  
119.752  
118.178  
114.548  
108.811  
82.862  
78.889  
77.164  
77.160 (CDCl<sub>3</sub>)  
76.906  
57.686  
53.055  
52.604  
47.438  
32.994  
0.140

[illegible]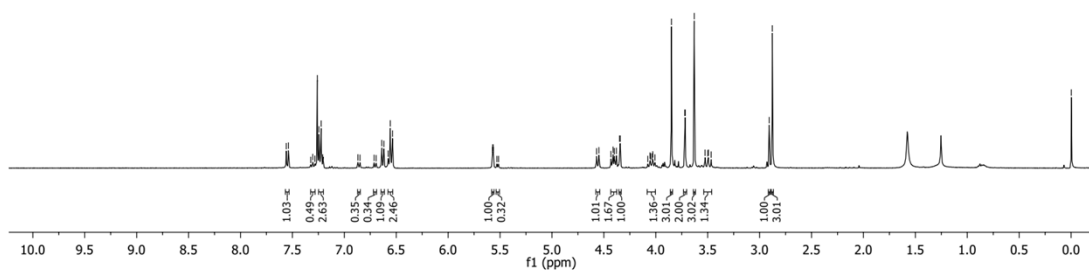[illegible]

SK-N4-191-1H

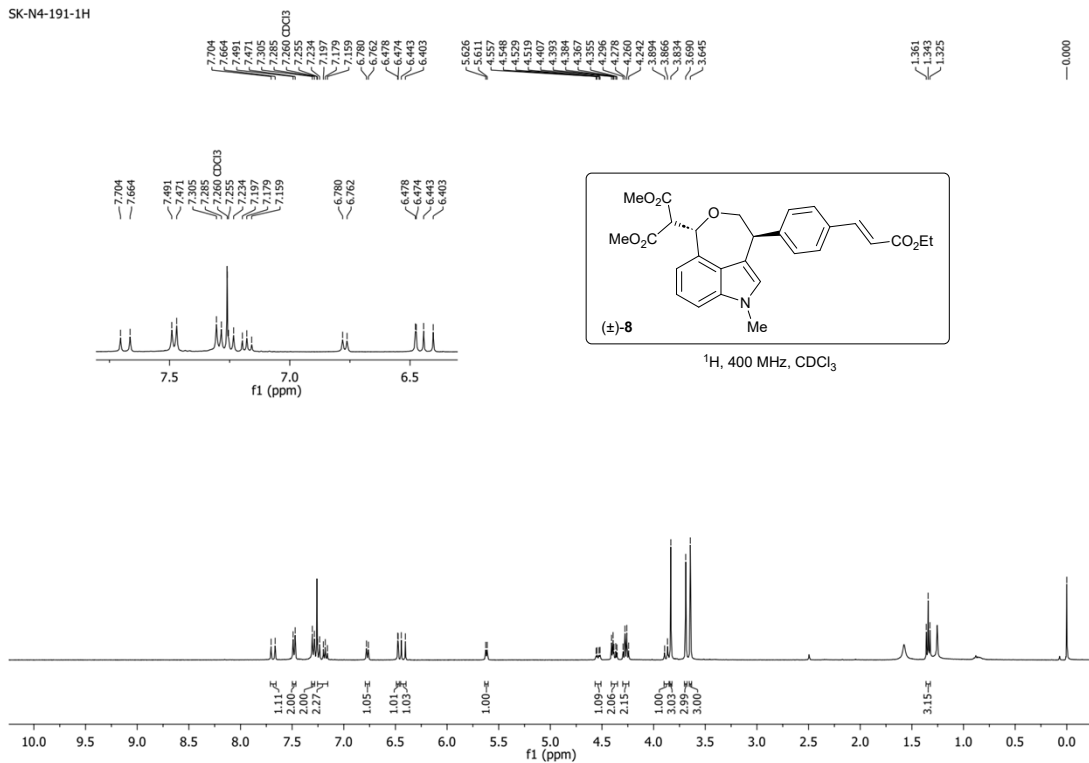

SK-N4-191-13C

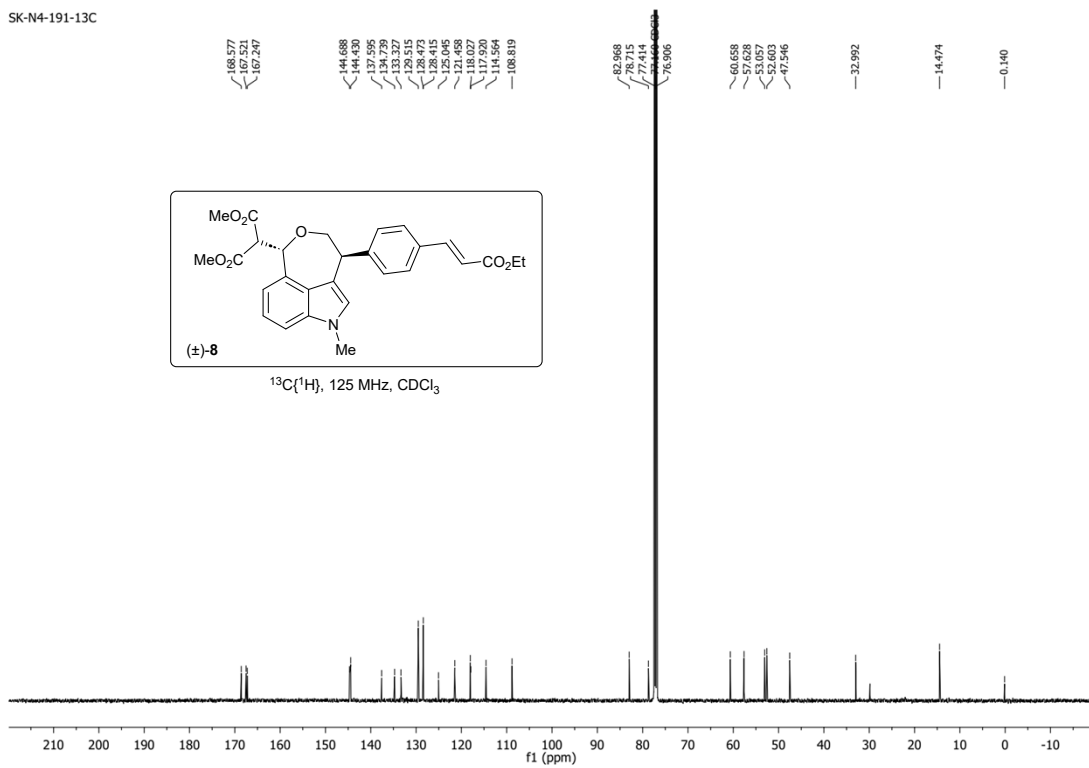

SK-N4-197-1H

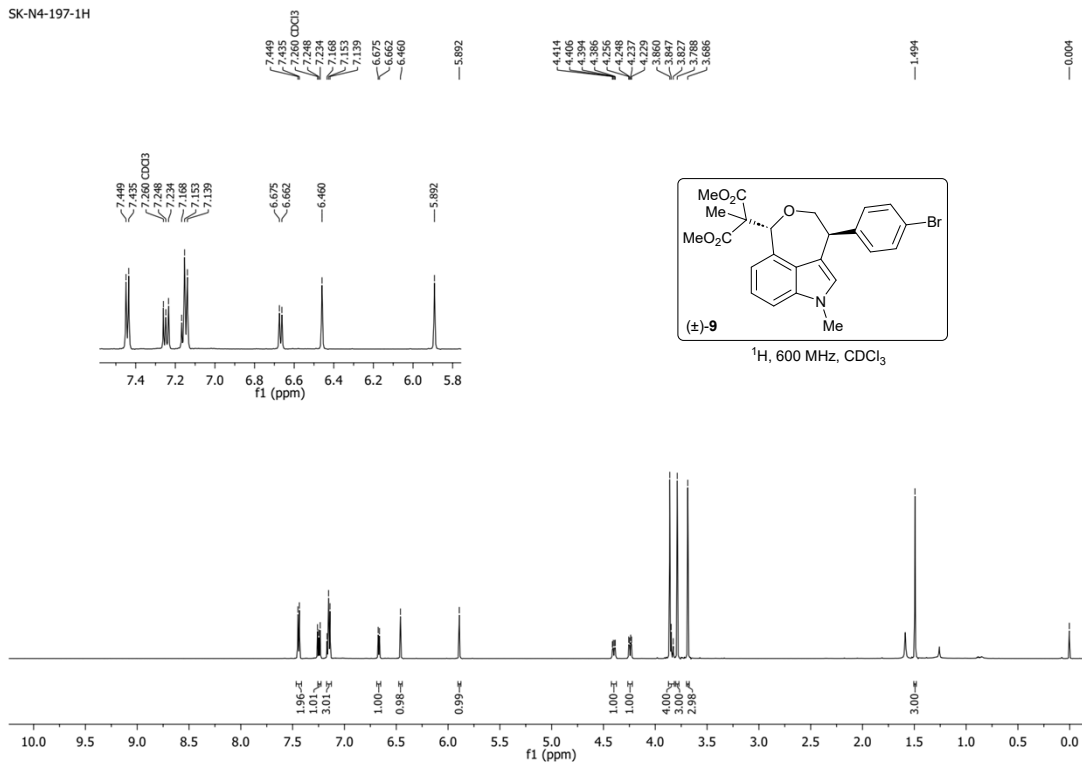

SK-N4-197-13C

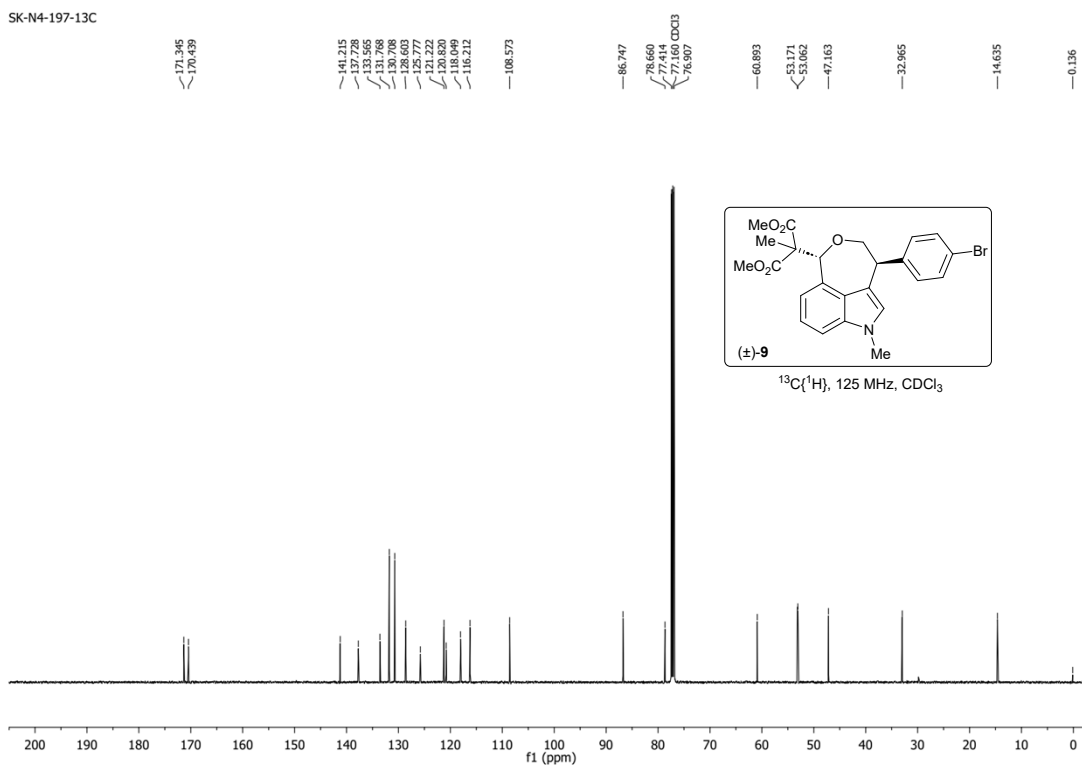

Supplement: d5cc06979c1.pdf [file d5cc06979c1.pdf]
